# Supplementary material for: Monoterpenoid coumarins and monoterpenoid phenylpropanoids from the root bark of Ailanthus altissima
Source: Royal Society of Chemistry journal article supplement (doi:10.1039/d0nj04872k), 2020-12-17
Supplement: d0nj04872k1.pdf [file d0nj04872k1.pdf]

**Monoterpenoid coumarins and monoterpenoid  
phenylpropanoids from the root barks of *Ailanthus altissima***

Zhi-Kang Duan<sup>a,1</sup>, Bin Lin<sup>b,1</sup>, Ye-Qin Du<sup>a</sup>, Chuan Li<sup>c</sup>, Xiao-Qi Yu<sup>a</sup>, Xiao-Bian Xue<sup>a</sup>,  
Qing-Bo Liu<sup>a</sup>, Shao-Jiang Song<sup>a</sup>, Xiao-Xiao Huang<sup>a\*</sup>

<sup>a</sup> *Key Laboratory of Computational Chemistry-Based Natural Antitumor Drug Research & Development, Liaoning Province, School of Traditional Chinese Materia Medica, Shenyang Pharmaceutical University, Shenyang 110016, China*

<sup>b</sup> *School of Pharmaceutical Engineering, Shenyang Pharmaceutical University, Shenyang 110016, People's Republic of China*

<sup>c</sup> *General Hospital of Northern Theater Command, Shenyang 110016, People's republic of China*

\*Corresponding author.

E-mail addresses: xiaoxiao270@163.com (X.-X. Huang)

<sup>1</sup> These authors contributed equally to this work.

## List of supplementary content

**Figure S1.1** UV spectrum of compound **1**

**Figure S1.2** HRESIMS spectrum of compound **1**

**Figure S1.3**  $^1\text{H}$  NMR spectrum (600 MHz,  $\text{CDCl}_3$ ) of compound **1**

**Figure S1.4**  $^{13}\text{C}$  NMR spectrum (150 MHz,  $\text{CDCl}_3$ ) of compound **1**

**Figure S1.5**  $^1\text{H}$  NMR spectrum (600 MHz,  $\text{CDCl}_3$ ) of compound **1a**

**Figure S1.6**  $^{13}\text{C}$  NMR spectrum (150 MHz,  $\text{CDCl}_3$ ) of compound **1a**

**Figure S1.7** HSQC spectrum (600 MHz,  $\text{CDCl}_3$ ) of compound **1a**

**Figure S1.8** HMBC spectrum (600 MHz,  $\text{CDCl}_3$ ) of compound **1a**

**Figure S1.9** NOESY spectrum of compound **1a**

**Figure S1.10**  $^1\text{H}$  NMR spectrum (600 MHz,  $\text{CDCl}_3$ ) of (*S*)-MTPA ester derivative of **1**

**Figure S1.11**  $^1\text{H}$  NMR spectrum (600 MHz,  $\text{CDCl}_3$ ) of (*R*)-MTPA ester derivative of **1**

**Figure S2.1** UV spectrum of compound **2**

**Figure S2.2** HRESIMS spectrum of compound **2**

**Figure S2.3**  $^1\text{H}$  NMR spectrum (600 MHz,  $\text{CDCl}_3$ ) of compound **2**

**Figure S2.4**  $^{13}\text{C}$  NMR spectrum (150 MHz,  $\text{CDCl}_3$ ) of compound **2**

**Figure S2.5** HSQC spectrum (600 MHz,  $\text{CDCl}_3$ ) of compound **2**

**Figure S2.6** HMBC spectrum (600 MHz,  $\text{CDCl}_3$ ) of compound **2**

**Figure S2.7**  $^1\text{H}$ - $^1\text{H}$  COSY spectrum of compound **2**

**Figure S2.8**  $^1\text{H}$  NMR spectrum (600 MHz,  $\text{CDCl}_3$ ) of compound **2a**

**Figure S2.9**  $^{13}\text{C}$  NMR spectrum (150 MHz,  $\text{CDCl}_3$ ) of compound **2a**

**Figure S2.10** HSQC spectrum (600 MHz,  $\text{CDCl}_3$ ) of compound **2a**

**Figure S2.11** HMBC spectrum (600 MHz,  $\text{CDCl}_3$ ) of compound **2a**

**Figure S2.12** NOESY spectrum of compound **2a**

**Figure S3.1** UV spectrum of compound **3**

**Figure S3.2** HRESIMS spectrum of compound **3**

**Figure S3.3**  $^1\text{H}$  NMR spectrum (600 MHz,  $\text{CDCl}_3$ ) of compound **3**

**Figure S3.4**  $^{13}\text{C}$  NMR spectrum (150 MHz,  $\text{CDCl}_3$ ) of compound **3**

**Figure S3.5**  $^1\text{H}$  NMR spectrum (600 MHz,  $\text{DMSO-}d_6$ ) of compound **3**

**Figure S3.6**  $^{13}\text{C}$  NMR spectrum (150 MHz,  $\text{DMSO-}d_6$ ) of compound **3**

**Figure S3.7** HSQC spectrum (600 MHz,  $\text{DMSO-}d_6$ ) of compound **3**

**Figure S3.8** HMBC spectrum (600 MHz,  $\text{DMSO-}d_6$ ) of compound **3**

**Figure S3.9**  $^1\text{H-}^1\text{H}$  COSY spectrum (600 MHz,  $\text{DMSO-}d_6$ ) of compound **3**

**Figure S3.10** Results of DP4+ analysis of compound **3**

**Figure S3.11** The low-energy conformers of the **3a**

**Figure S3.12** The low-energy conformers of the **3b**

**Figure S4.1** UV spectrum of compound **4**

**Figure S4.2** HRESIMS spectrum of compound **4**

**Figure S4.3**  $^1\text{H}$  NMR spectrum (600 MHz,  $\text{CDCl}_3$ ) of compound **4**

**Figure S4.4**  $^{13}\text{C}$  NMR spectrum (150 MHz,  $\text{CDCl}_3$ ) of compound **4**

**Figure S4.5**  $^1\text{H}$  NMR spectrum (600 MHz,  $\text{DMSO-}d_6$ ) of compound **4**

**Figure S4.6**  $^{13}\text{C}$  NMR spectrum (150 MHz,  $\text{DMSO-}d_6$ ) of compound **4**

**Figure S4.7** HSQC spectrum (600 MHz,  $\text{DMSO-}d_6$ ) of compound **4**

**Figure S4.8** HMBC spectrum (600 MHz,  $\text{DMSO-}d_6$ ) of compound **4**

**Figure S4.9**  $^1\text{H-}^1\text{H}$  COSY spectrum (600 MHz,  $\text{DMSO-}d_6$ ) of compound **4**

**Figure S4.10** Results of DP4+ analysis of compound **4**

**Figure S4.11** The low-energy conformers of the **4a**

**Figure S4.12** The low-energy conformers of the **4b**

**Figure S5.1** UV spectrum of compound **5**

**Figure S5.2** HRESIMS spectrum of compound **5**

**Figure S5.3**  $^1\text{H}$  NMR spectrum (600 MHz,  $\text{CDCl}_3$ ) of compound **5**

**Figure S5.4**  $^{13}\text{C}$  NMR spectrum (150 MHz,  $\text{CDCl}_3$ ) of compound **5**

**Figure S5.5** HSQC spectrum (600 MHz,  $\text{CDCl}_3$ ) of compound **5**

**Figure S5.6** HMBC spectrum (600 MHz,  $\text{CDCl}_3$ ) of compound **5**

**Figure S5.7**  $^1\text{H}$  NMR spectrum (600 MHz,  $\text{DMSO-}d_6$ ) of compound **5**

**Figure S5.8**  $^{13}\text{C}$  NMR spectrum (150 MHz,  $\text{DMSO-}d_6$ ) of compound **5**

**Figure S5.9** HSQC spectrum (600 MHz,  $\text{DMSO-}d_6$ ) of compound **5**

**Figure S5.10** HMBC spectrum (600 MHz,  $\text{DMSO-}d_6$ ) of compound **5**

**Figure S5.11**  $^1\text{H}$ - $^1\text{H}$  COSY spectrum (600 MHz,  $\text{DMSO-}d_6$ ) of compound **5**

**Figure S5.12** 1D NOESY spectrum (600 MHz,  $\text{DMSO-}d_6$ ) of compound **5**: selective excitation at  $\delta_{\text{H}}$  5.12 (5'-OH), full spectrum

**Figure S5.13** Results of DP4+ analysis of compound **5**

**Figure S5.14** The low-energy conformers of the **5a**

**Figure S5.15** The low-energy conformers of the **5b**

**Figure S6.1** UV spectrum of compound **6**

**Figure S6.2** HRESIMS spectrum of compound **6**

**Figure S6.3**  $^1\text{H}$  NMR spectrum (600 MHz,  $\text{DMSO-}d_6$ ) of compound **6**

**Figure S6.4**  $^{13}\text{C}$  NMR spectrum (125 MHz,  $\text{DMSO-}d_6$ ) of compound **6**

**Figure S6.5** HSQC spectrum (600 MHz,  $\text{DMSO-}d_6$ ) of compound **6**

**Figure S6.6** HMBC spectrum (600 MHz,  $\text{DMSO-}d_6$ ) of compound **6**

**Figure S6.7**  $^1\text{H}$ - $^1\text{H}$  COSY spectrum of compound **6**

**Figure S6.8**  $^1\text{H}$  NMR spectrum (600 MHz,  $\text{DMSO-}d_6$ ) of compound **6a**

**Figure S6.9**  $^{13}\text{C}$  NMR spectrum (150 MHz,  $\text{DMSO-}d_6$ ) of compound **6a**

**Figure S6.10** HSQC spectrum (600 MHz,  $\text{DMSO-}d_6$ ) of compound **6a**

**Figure S6.11** HMBC spectrum (600 MHz,  $\text{DMSO-}d_6$ ) of compound **6a**

**Figure S6.12** NOESY spectrum of compound **6a**

**Table S1**  $^1\text{H}$  NMR spectroscopic data for compounds **1, 5, 7, 8**

**Table S2**  $^{13}\text{C}$  NMR spectroscopic data for compounds **1, 5, 7, 8**

**Table S3**  $^1\text{H}$  NMR (600 MHz) and  $^{13}\text{C}$  NMR (150 MHz) spectroscopic data for compounds **1a, 2a** (in  $\text{CDCl}_3$ )

**Table S4**  $^1\text{H}$  NMR (600MHz) and  $^{13}\text{C}$  NMR (150MHz) spectroscopic data for compound **6a** (in  $\text{DMSO-}d_6$ ).

**Table S5** Cytotoxicity of compounds **1-8** against two human cancer cell lines.

**Table S6** DFT B3LYP/6-311+G(d, p) relative free energies and population for the most relevant conformers of **3a**

**Table S7** DFT B3LYP/6-311+G(d, p) relative free energies and population for the most relevant conformers of **3b**

**Table S8** DFT B3LYP/6-311+G(d, p) relative free energies and population for the most

relevant conformers of **4a**

**Table S9** DFT B3LYP/6-311+G(d, p) relative free energies and population for the most relevant conformers of **4b**

**Table S10** DFT B3LYP/6-311+G(d, p) relative free energies and population for the most relevant conformers of **5a**

**Table S11** DFT B3LYP/6-311+G(d, p) relative free energies and population for the most relevant conformers of **5b**

**Table S12** Calculated  $^{13}\text{C}$  chemical shift values (cal.) of structure **3a-5a, 3b-5b**

# Spectrum Peak Pick Report

FIELD FIELD TEXT

Data Set: 没有

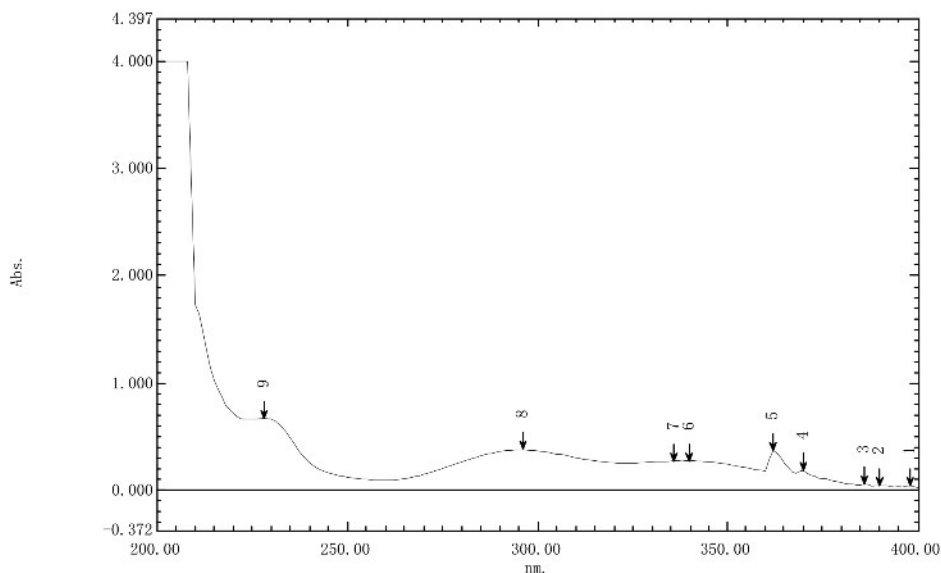

测定属性  
 波长范围 (nm.): 200.00到400.00  
 扫描速度: 中速  
 采样间隔: 1.0  
 自动采样间隔: 停用  
 扫描模式: 单一的

试样准备属性  
 重量:  
 体积:  
 稀释:  
 光程长:  
 附加信息:

仪器属性  
 仪器类型: UV-1700  
 测定方式: 吸收值  
 狭缝宽: 1.0 nm  
 光源改变波长: 360.0 nm  
 S/R 转换: 标准

附件属性  
 附件: 无

| No. | P/V | Wavelength | Abs. | 描述 |
|-----|-----|------------|------|----|
| 1   | ●   | 398.00     | .041 |    |
| 2   | ●   | 390.00     | .044 |    |
| 3   | ●   | 386.00     | .055 |    |
| 4   | ●   | 370.00     | .182 |    |
| 5   | ●   | 362.00     | .370 |    |
| 6   | ●   | 340.00     | .275 |    |
| 7   | ●   | 336.00     | .273 |    |
| 8   | ●   | 296.00     | .376 |    |
| 9   | ●   | 228.00     | .669 |    |
| 10  | ●   | 394.00     | .028 |    |
| 11  | ●   | 388.00     | .039 |    |
| 12  | ●   | 384.00     | .047 |    |
| 13  | ●   | 368.00     | .158 |    |
| 14  | ●   | 360.00     | .178 |    |
| 15  | ●   | 338.00     | .272 |    |
| 16  | ●   | 322.00     | .250 |    |
| 17  | ●   | 259.00     | .092 |    |
| 18  | ●   | 225.00     | .661 |    |

FIELD TEXT

Figure S1.1 UV spectrum of compound 1

Single Mass Analysis

Tolerance = 10.0 PPM / DBE: min = -1.5, max = 50.0

Element prediction: Off

Number of isotope peaks used for i-FIT = 3

Monoisotopic Mass, Even Electron Ions

17 formula(e) evaluated with 1 results within limits (up to 50 closest results for each mass)

Elements Used:

C: 21-21 H: 0-50 O: 0-8 S: 0-1

DZK-23 84 (0.481)

1: TOF MS ES+

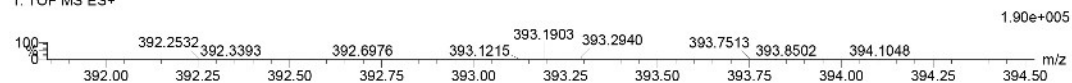

Minimum: -1.5  
Maximum: 50.0

| Mass     | Calc. Mass | mDa  | PPM  | DBE | i-FIT | Norm | Conf(%) | Formula    |
|----------|------------|------|------|-----|-------|------|---------|------------|
| 393.1903 | 393.1913   | -1.0 | -2.5 | 7.5 | 345.6 | n/a  | n/a     | C21 H29 O7 |

DZK-23 84 (0.481)

100

393.1903

1: TOF MS ES+

1.90e5

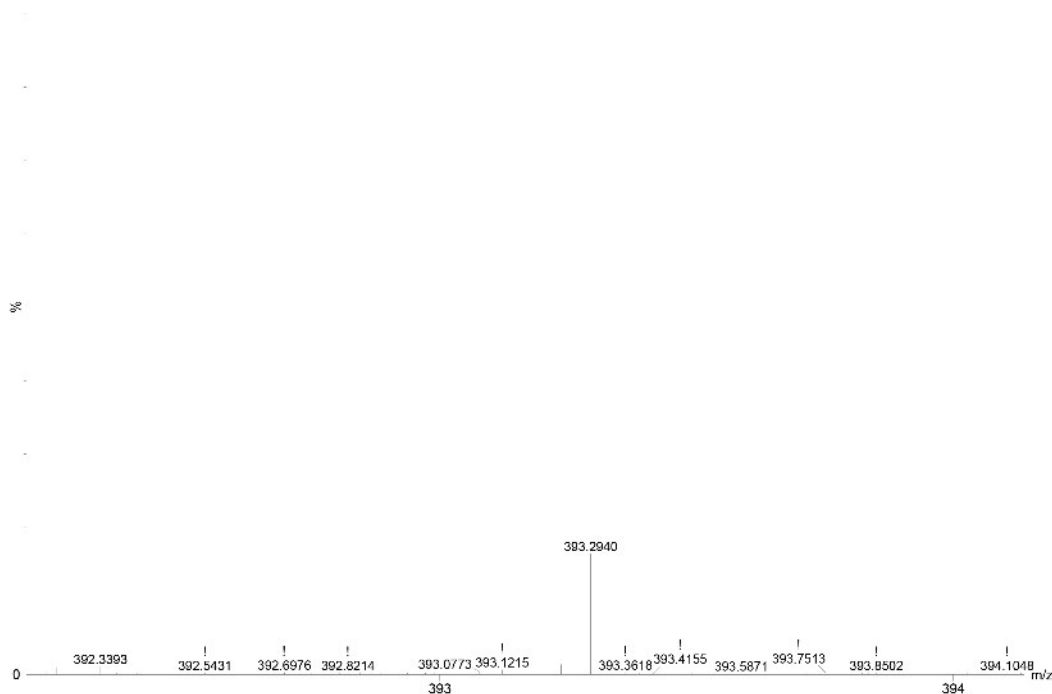

Figure S1.2 HRESIMS spectrum of compound 1

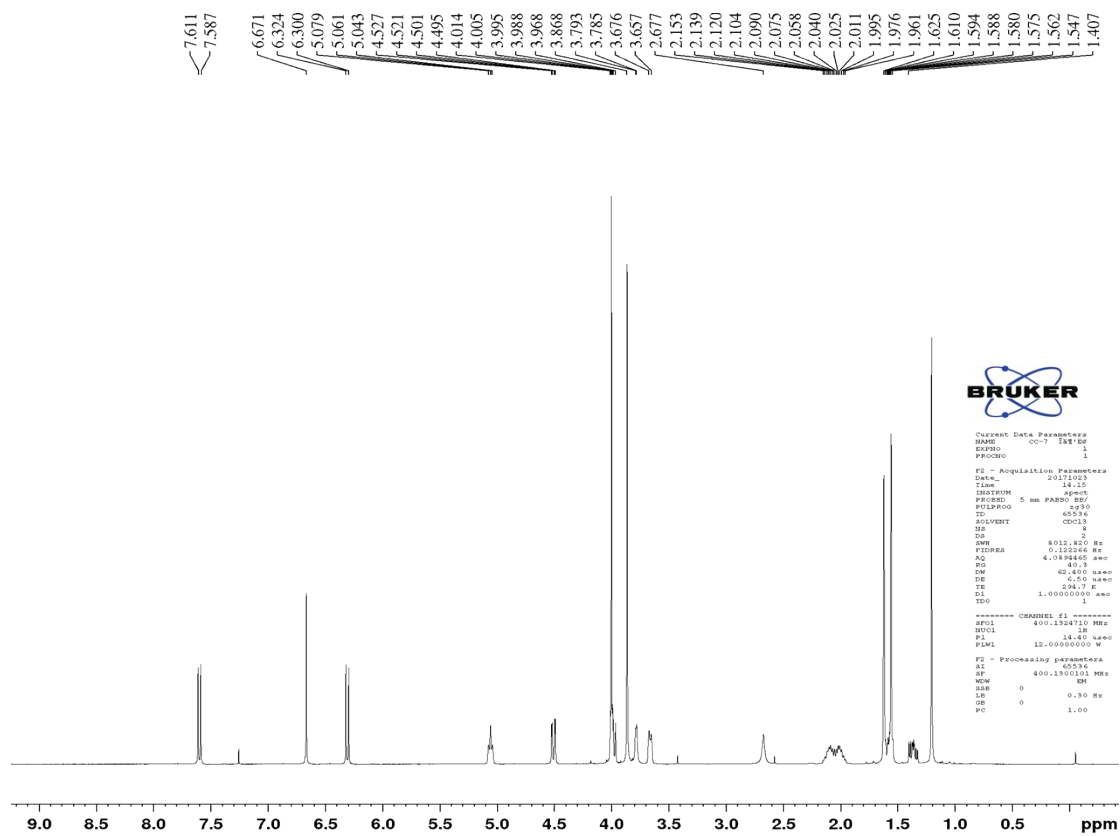

Figure S1.3  $^1\text{H}$  NMR spectrum (600 MHz,  $\text{CDCl}_3$ ) of compound 1

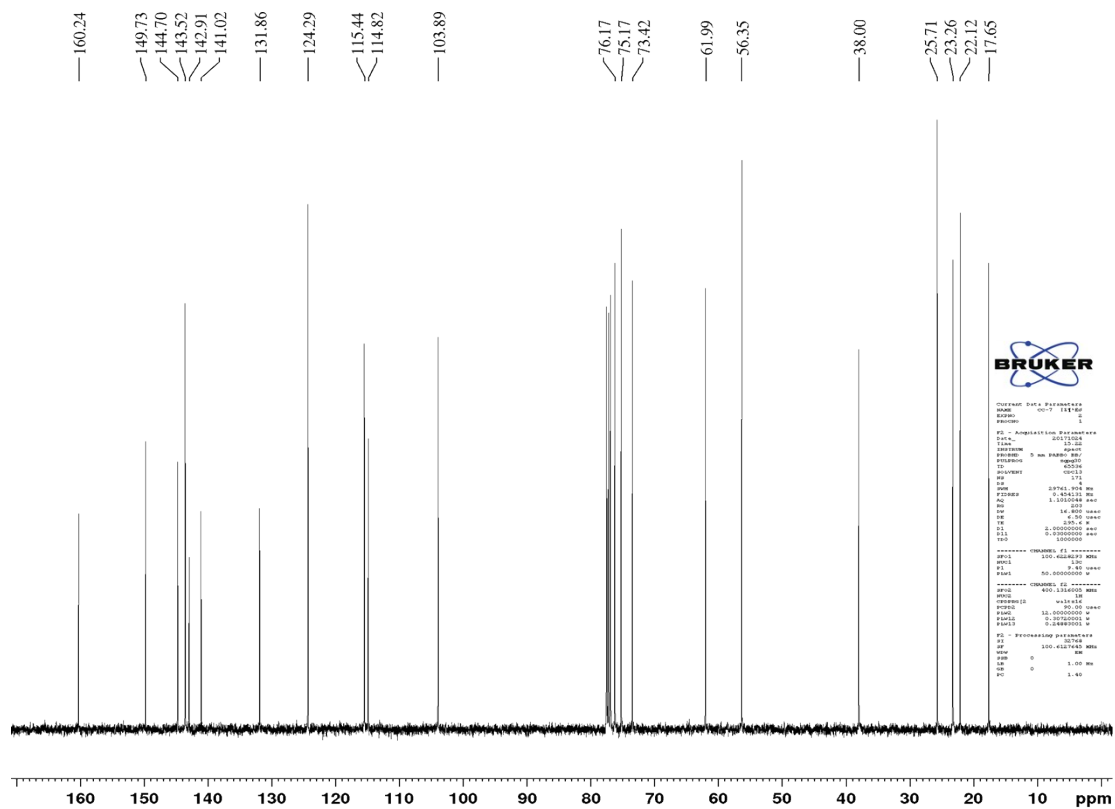

Figure S1.4  $^{13}\text{C}$  NMR spectrum (150 MHz,  $\text{CDCl}_3$ ) of compound 1



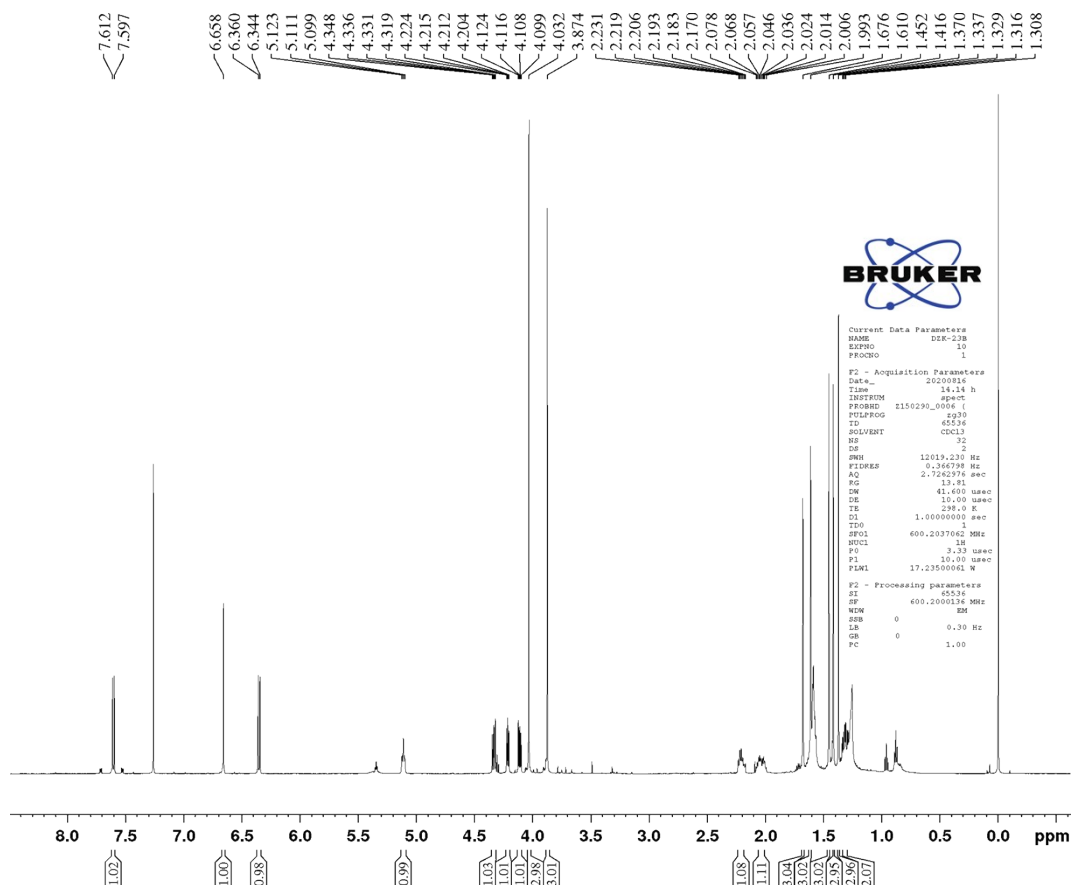

Figure S1.5  $^1\text{H}$  NMR spectrum (600 MHz,  $\text{CDCl}_3$ ) of compound 1a

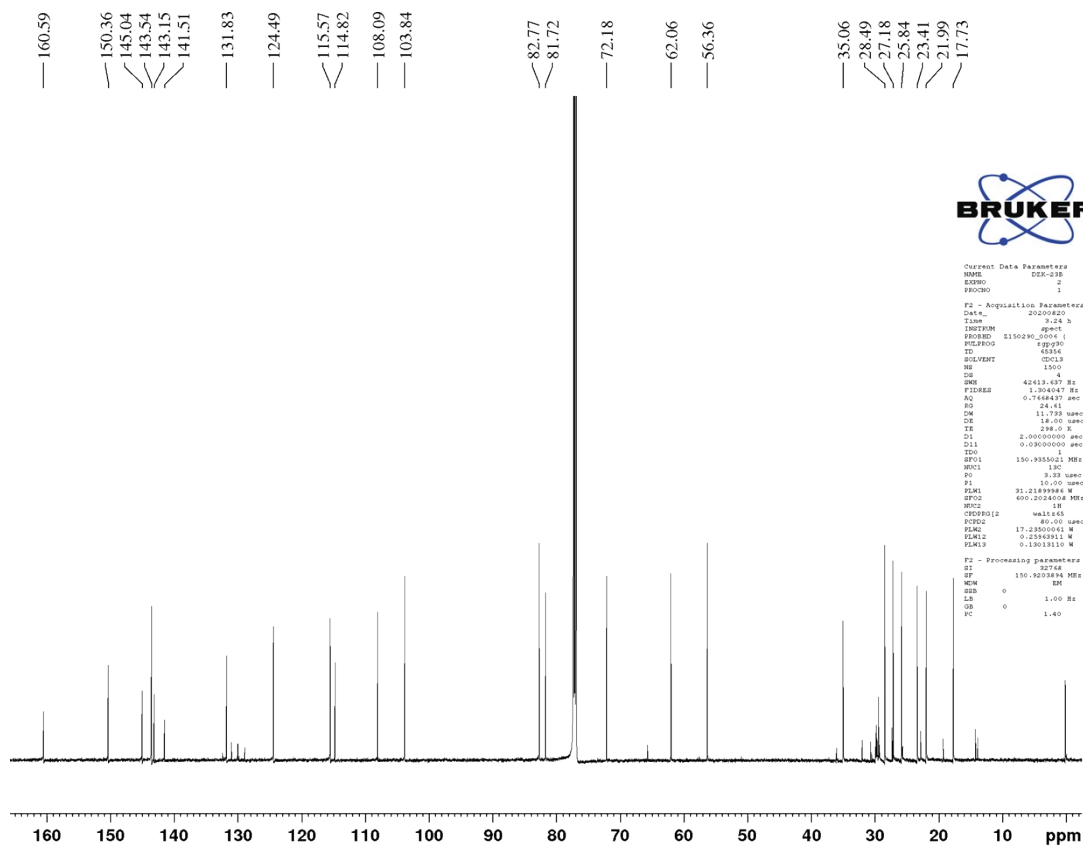

Figure S1.6  $^{13}\text{C}$  NMR spectrum (150 MHz,  $\text{CDCl}_3$ ) of compound 1a

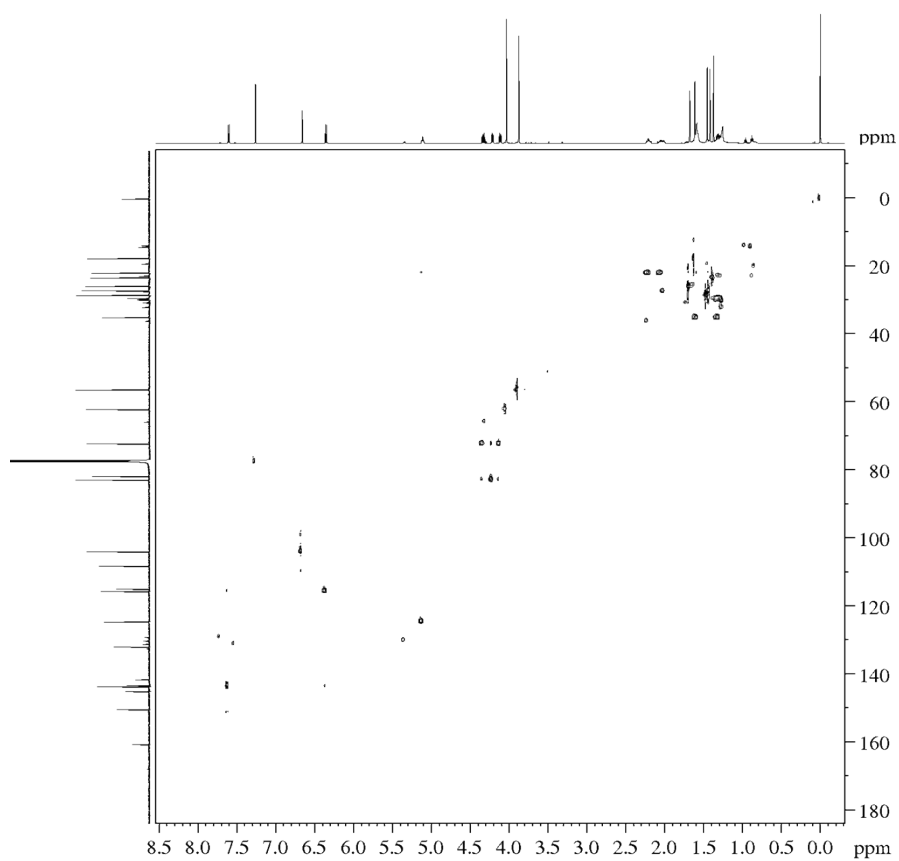

**Figure S1.7** HSQC spectrum (600 MHz, CDCl<sub>3</sub>) of compound **1a**

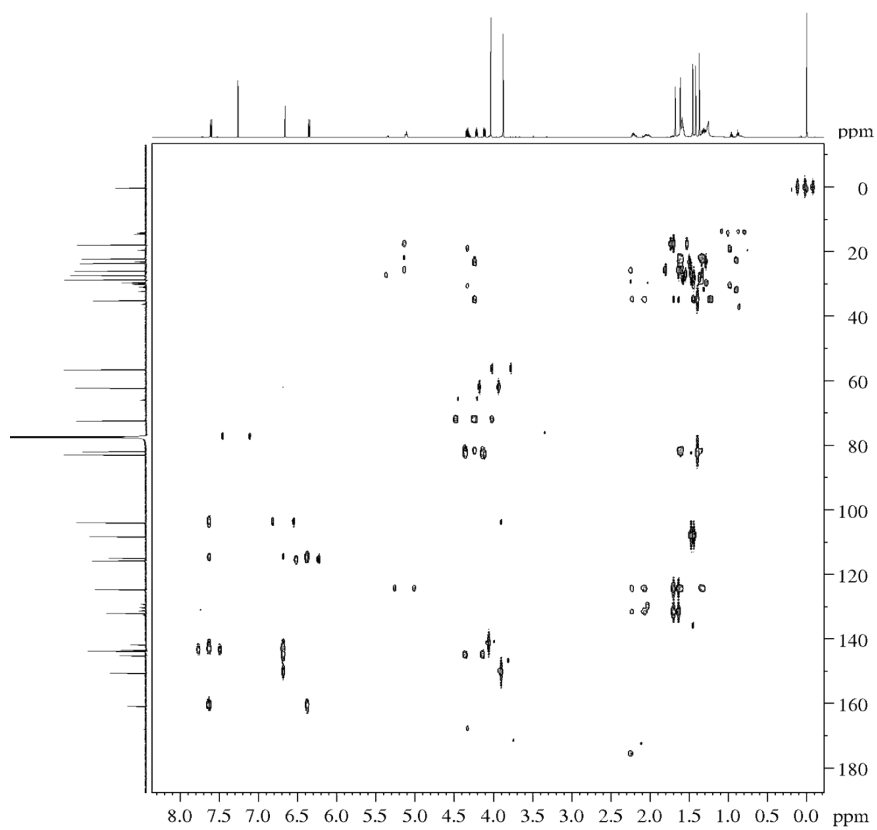

**Figure S1.8** HMBC spectrum (600 MHz, CDCl<sub>3</sub>) of compound **1a**

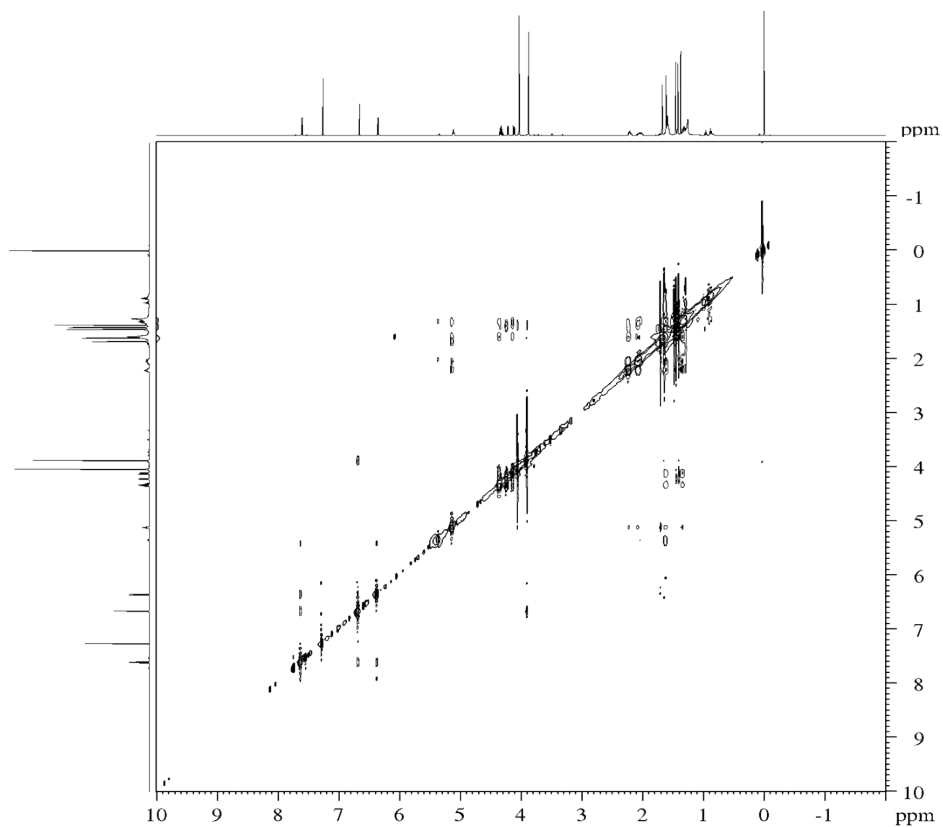

Figure S1.9 NOESY spectrum of compound 1a

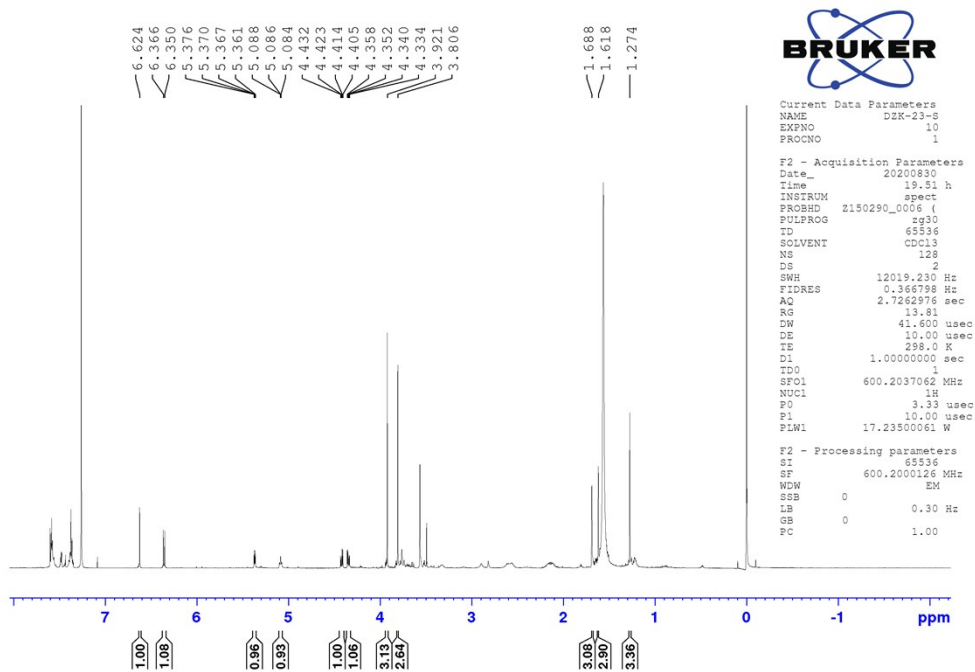

Figure S1.10  $^1\text{H}$  NMR spectrum (600 MHz,  $\text{CDCl}_3$ ) of (*S*)-MTPA ester derivative of 1

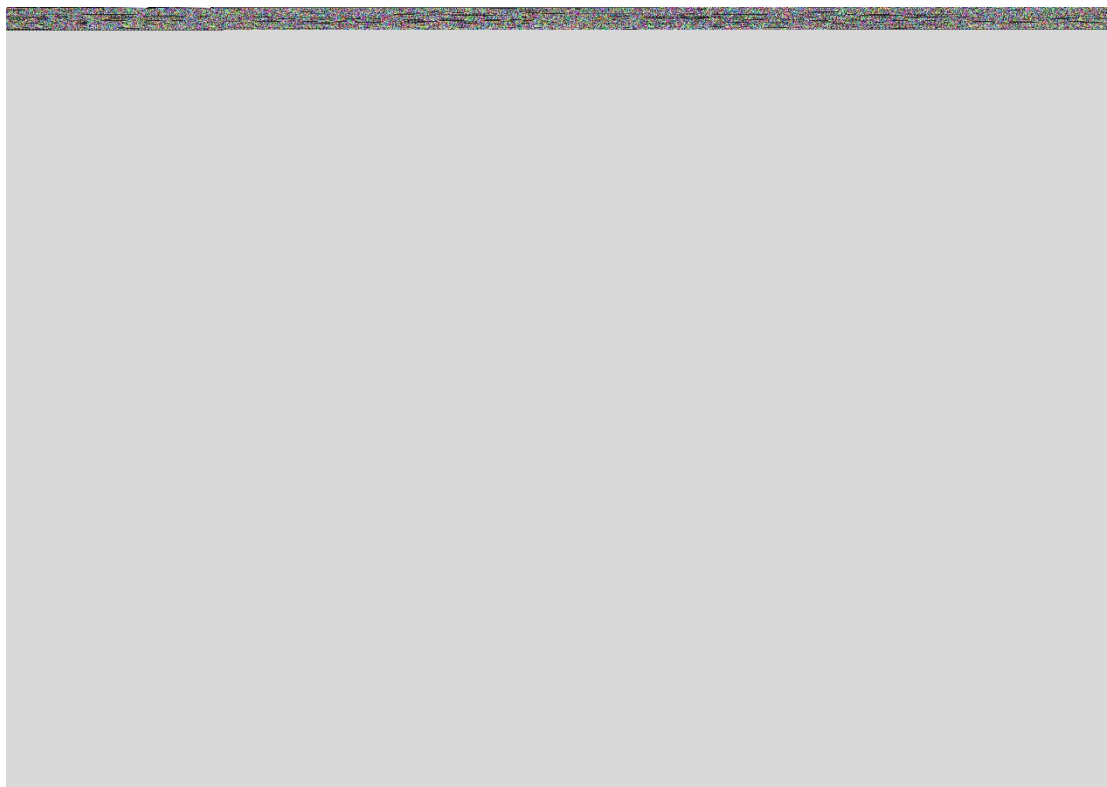

**Figure S1.11** <sup>1</sup>H NMR spectrum (600 MHz, CDCl<sub>3</sub>) of (*R*)-MTPA ester derivative of **1**

# Spectrum Peak Pick Report

FIELD FIELD TEXT

Data Set: 没有

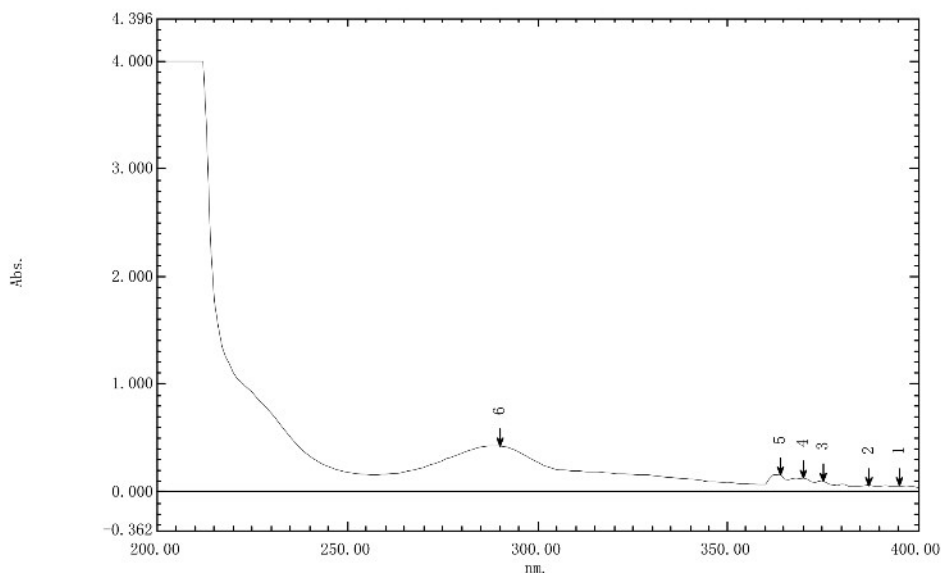

测定属性  
 波长范围 (nm.): 200.00到400.00  
 扫描速度: 中速  
 采样间隔: 1.0  
 自动采样间隔: 停用  
 扫描模式: 单一的

试样准备属性  
 重量:  
 体积:  
 稀释:  
 光程长:  
 附加信息:

仪器属性  
 仪器类型: UV-1700  
 测定方式: 吸收值  
 狭缝宽: 1.0 nm  
 光源改变波长: 360.0 nm  
 S/R 转换: 标准

附件属性  
 附件: 无

| No. | P/V | Wavelength | Abs. | 描述 |
|-----|-----|------------|------|----|
| 1   | ●   | 395.00     | .046 |    |
| 2   | ●   | 387.00     | .057 |    |
| 3   | ●   | 375.00     | .097 |    |
| 4   | ●   | 370.00     | .118 |    |
| 5   | ●   | 364.00     | .156 |    |
| 6   | ●   | 290.00     | .420 |    |
| 7   | ⬇   | 389.00     | .040 |    |
| 8   | ⬇   | 384.00     | .043 |    |
| 9   | ⬇   | 373.00     | .079 |    |
| 10  | ⬇   | 366.00     | .104 |    |
| 11  | ⬇   | 358.00     | .062 |    |
| 12  | ⬇   | 257.00     | .152 |    |

FIELD TEXT

Figure S2.1 UV spectrum of compound 2

## Mass Spectrum SmartFormula Report

### Analysis Info

Analysis Name D:\Data\20191218-CEYANG\DKZK-25\_1-A,8\_01\_14757.d  
 Method 20191205yezhi.m  
 Sample Name DKZK-25  
 Comment

Acquisition Date 12/18/2019 12:34:06 PM

Operator Bruker Customer  
 Instrument / Ser# micrOTOF-Q 125

### Acquisition Parameter

|             |          |                       |           |                  |           |
|-------------|----------|-----------------------|-----------|------------------|-----------|
| Source Type | ESI      | Ion Polarity          | Positive  | Set Nebulizer    | 1.2 Bar   |
| Focus       | Active   | Set Capillary         | 4500 V    | Set Dry Heater   | 180 °C    |
| Scan Begin  | 50 m/z   | Set End Plate Offset  | -500 V    | Set Dry Gas      | 8.0 l/min |
| Scan End    | 1500 m/z | Set Collision Cell RF | 400.0 Vpp | Set Divert Valve | Source    |

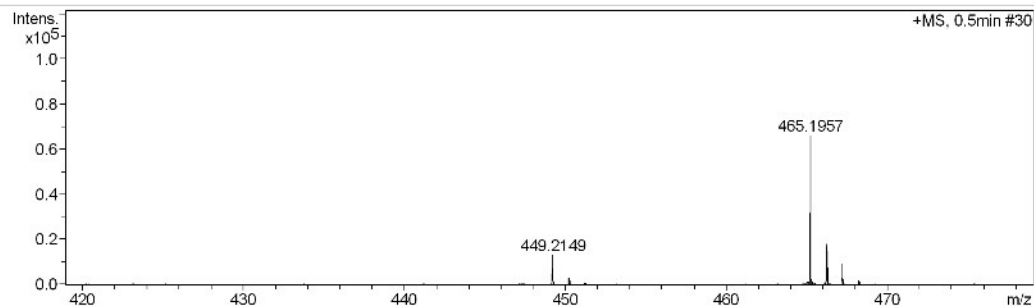

| Meas. m/z | # | Formula                                          | m/z      | err [ppm] | Mean err [ppm] | rdb | N-Rule | e <sup>-</sup> Conf | mSigma | Std I  | Std Mean m/z | Std I VarNorm | Std m/z Diff | Std Comb Dev |
|-----------|---|--------------------------------------------------|----------|-----------|----------------|-----|--------|---------------------|--------|--------|--------------|---------------|--------------|--------------|
| 449.2149  | 1 | C <sub>22</sub> H <sub>34</sub> NaO <sub>8</sub> | 449.2146 | -0.8      | 3.7            | 5.5 | ok     | even                | 16.03  | 0.0370 | 0.0067       | 0.0149        | 0.0167       | 0.8427       |

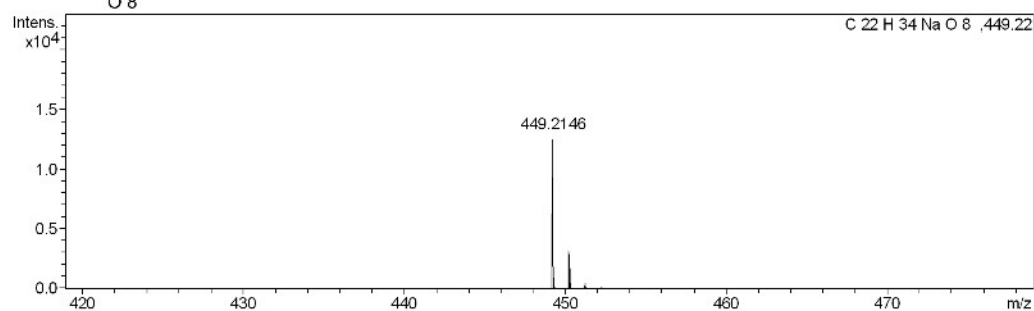

| Meas. m/z | # | Formula | m/z | err [ppm] | Mean err [ppm] | rdb | N-Rule | e <sup>-</sup> Conf | mSigma | Std I | Std Mean m/z | Std I VarNorm | Std m/z Diff | Std Comb Dev |
|-----------|---|---------|-----|-----------|----------------|-----|--------|---------------------|--------|-------|--------------|---------------|--------------|--------------|
| 449.2146  |   |         |     |           |                |     |        |                     |        |       |              |               |              |              |

**Figure S2.2** HRESIMS spectrum of compound **2**

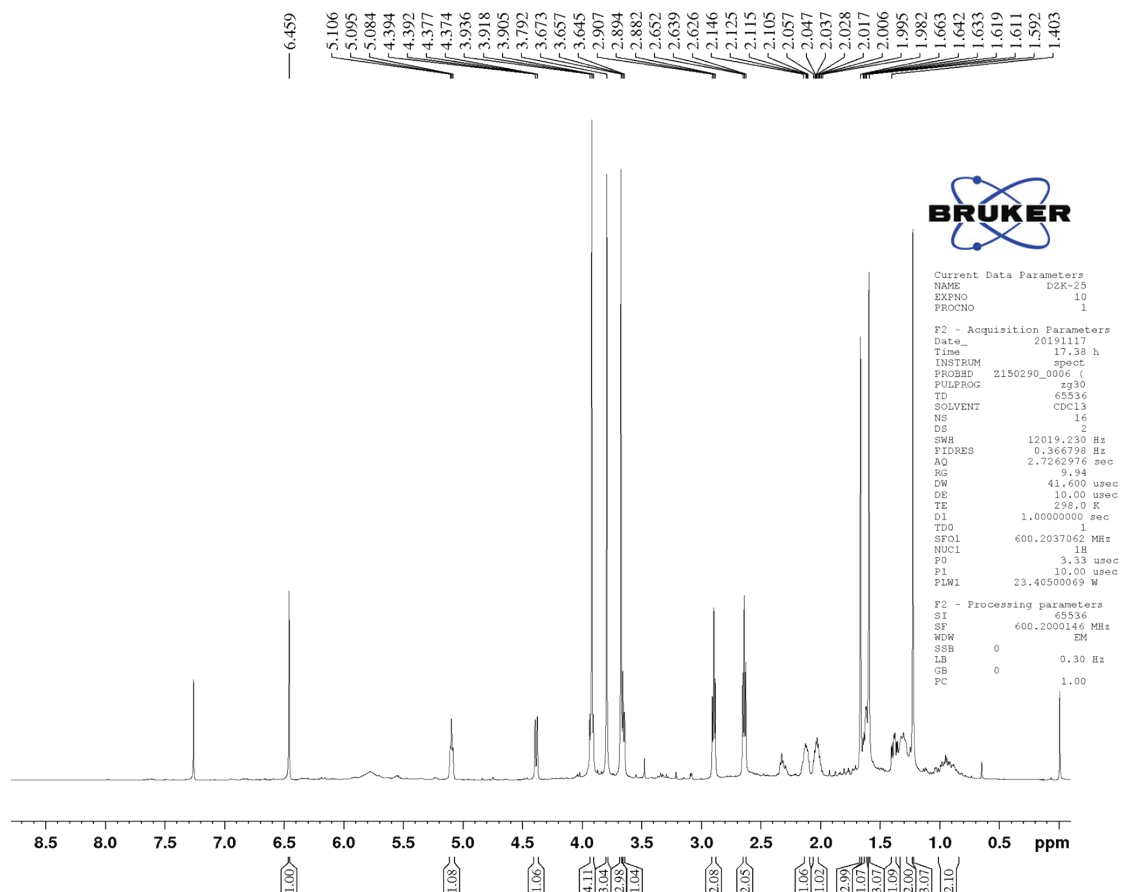

Figure S2.3 <sup>1</sup>H NMR spectrum (600 MHz, CDCl<sub>3</sub>) of compound 2

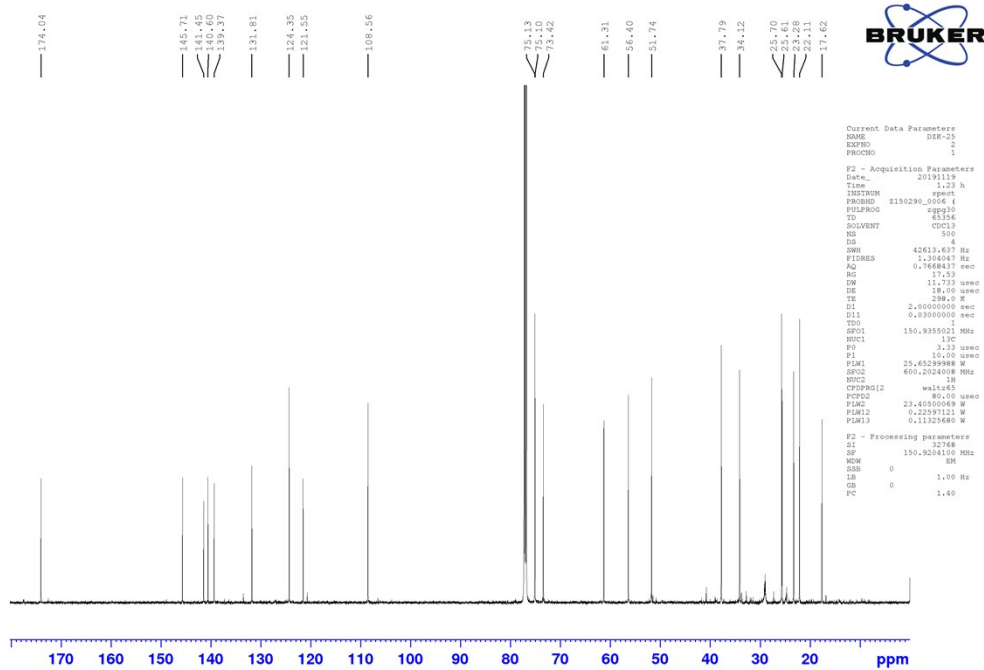

Figure S2.4 <sup>13</sup>C NMR spectrum (125 MHz, CDCl<sub>3</sub>) of compound 2

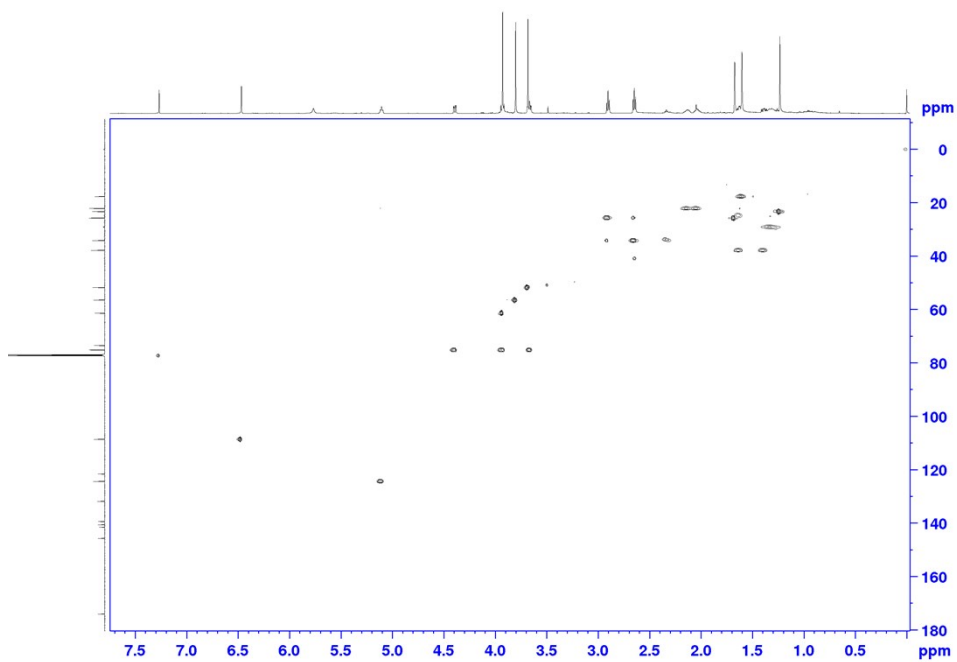

**Figure S2.5** HSQC spectrum (600 MHz,  $\text{CDCl}_3$ ) of compound **2**

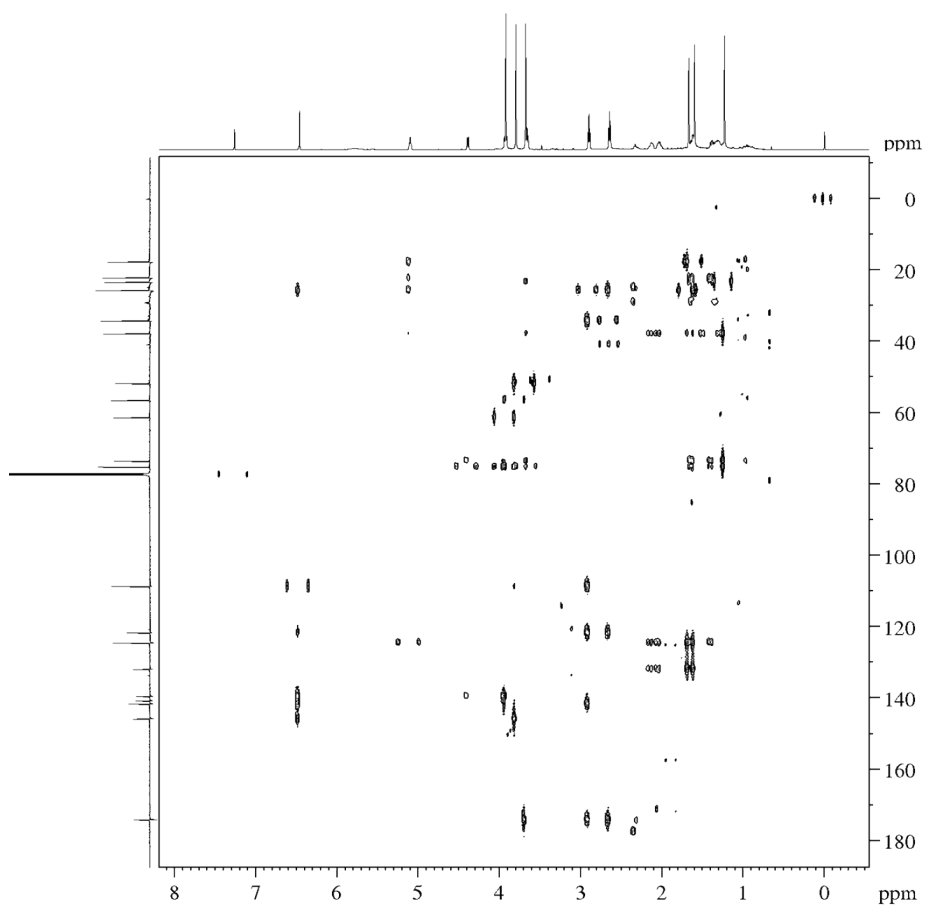

**Figure S2.6** HMBC spectrum (600 MHz,  $\text{CDCl}_3$ ) of compound **2**



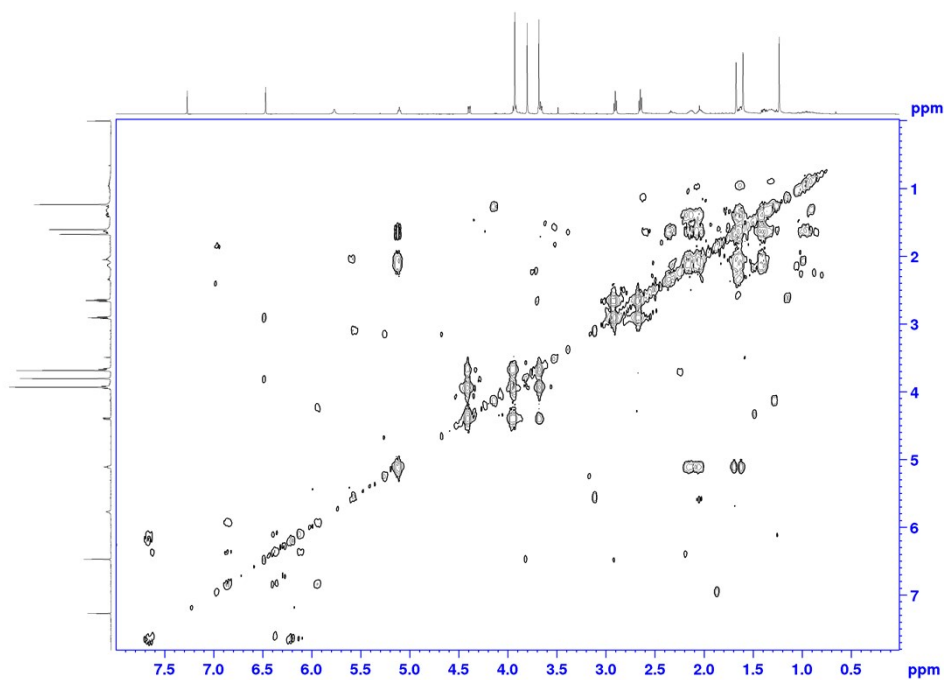

Figure S2.7  $^1\text{H}$ - $^1\text{H}$  COSY spectrum of compound **2**

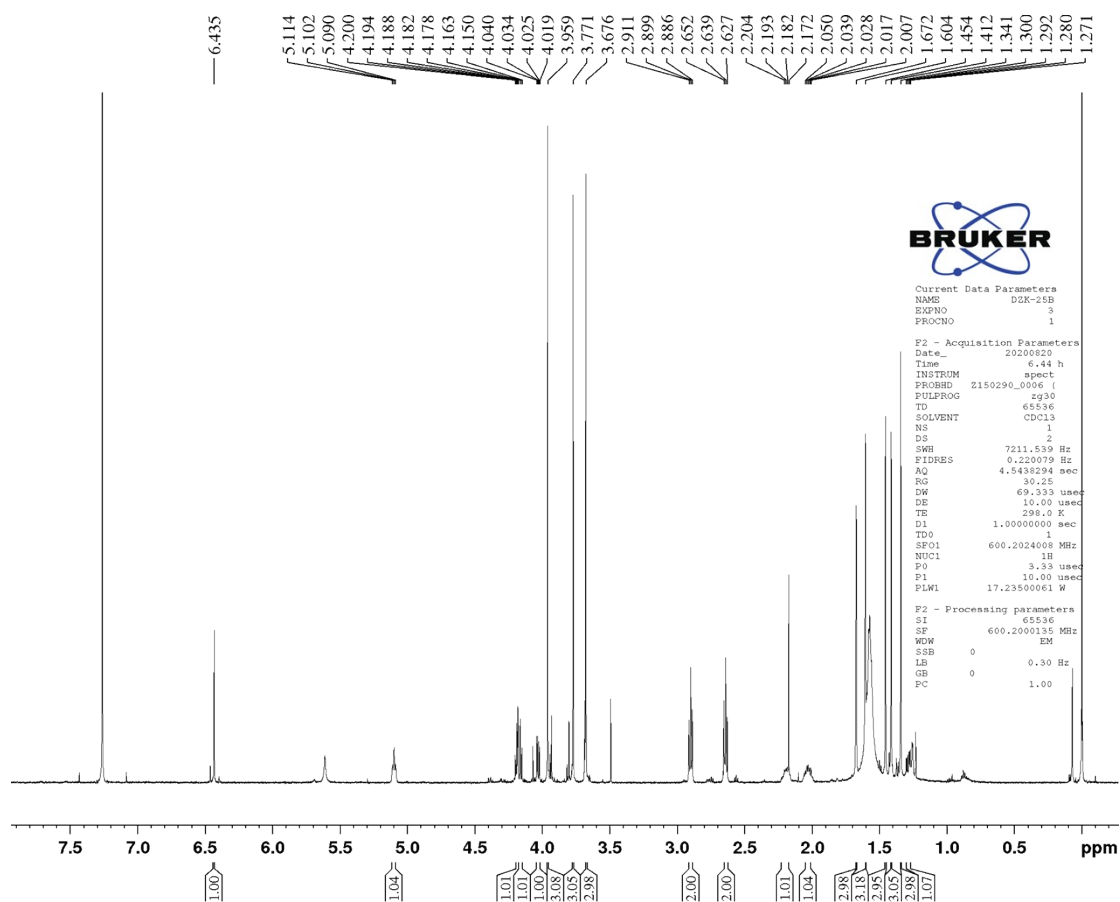

Figure S2.8  $^1\text{H}$  NMR spectrum (600 MHz,  $\text{CDCl}_3$ ) of compound **2a**

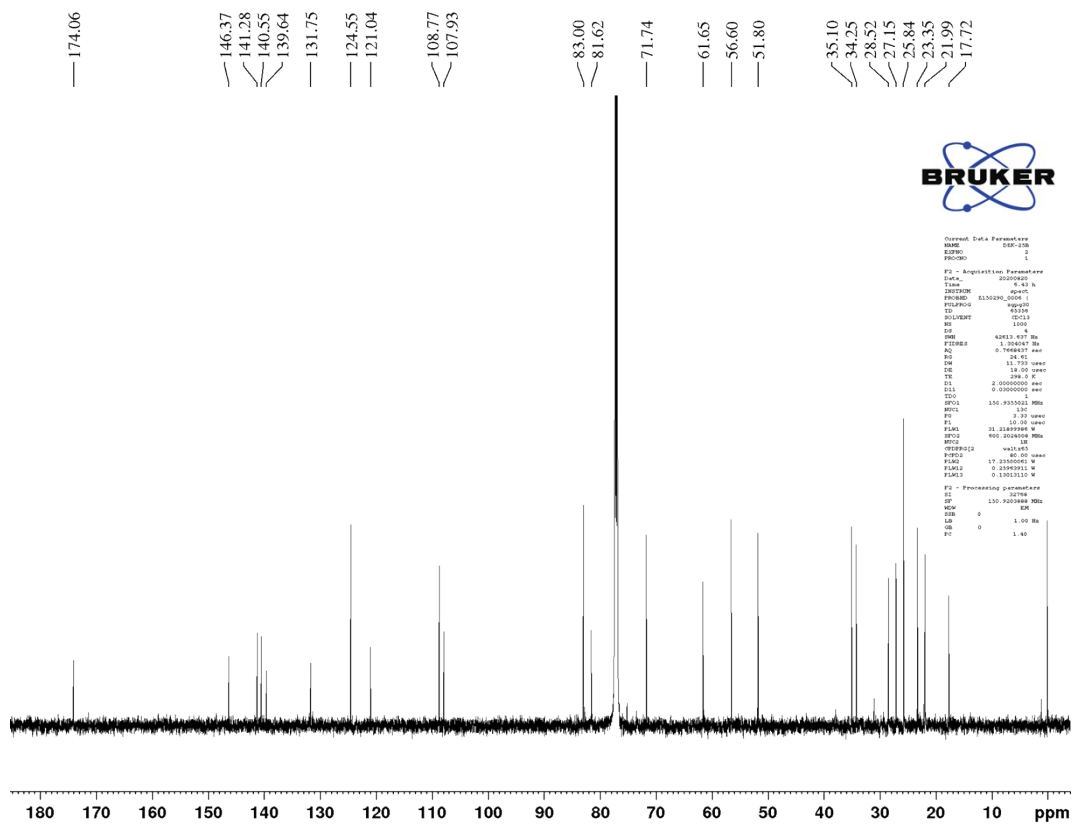

Figure S2.9 <sup>13</sup>C NMR spectrum (150 MHz, CDCl<sub>3</sub>) of compound 2a

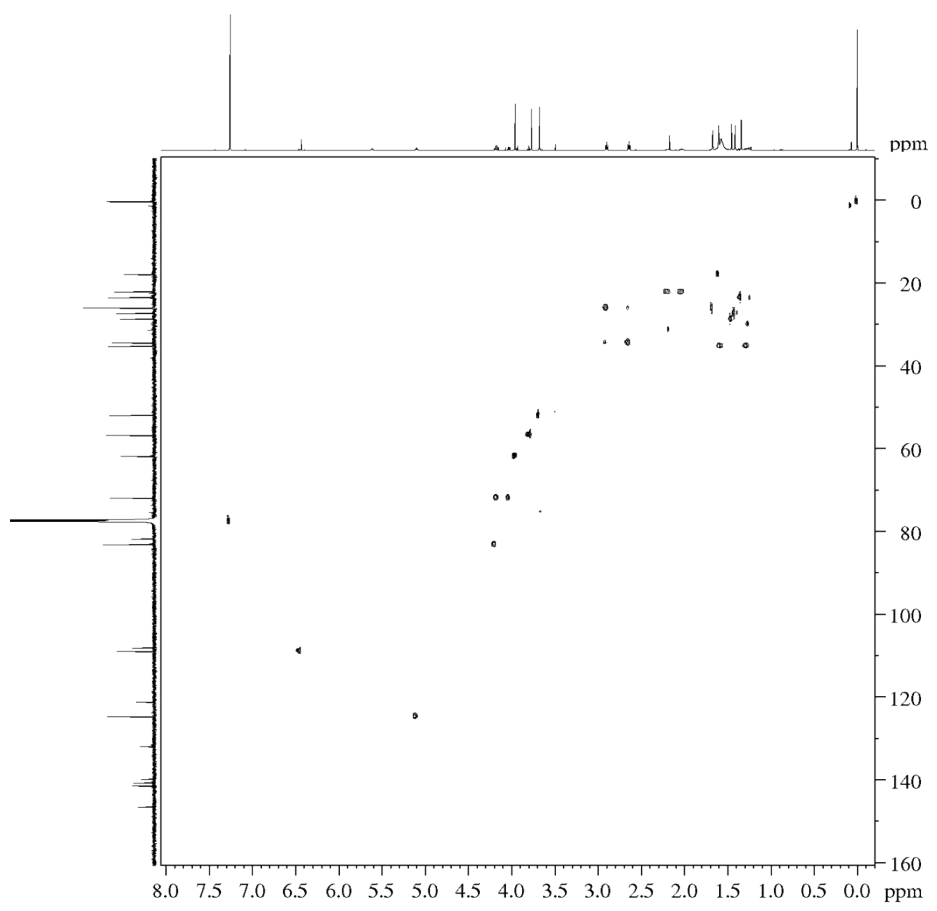

Figure S2.10 HSQC spectrum (600 MHz, CDCl<sub>3</sub>) of compound 2a

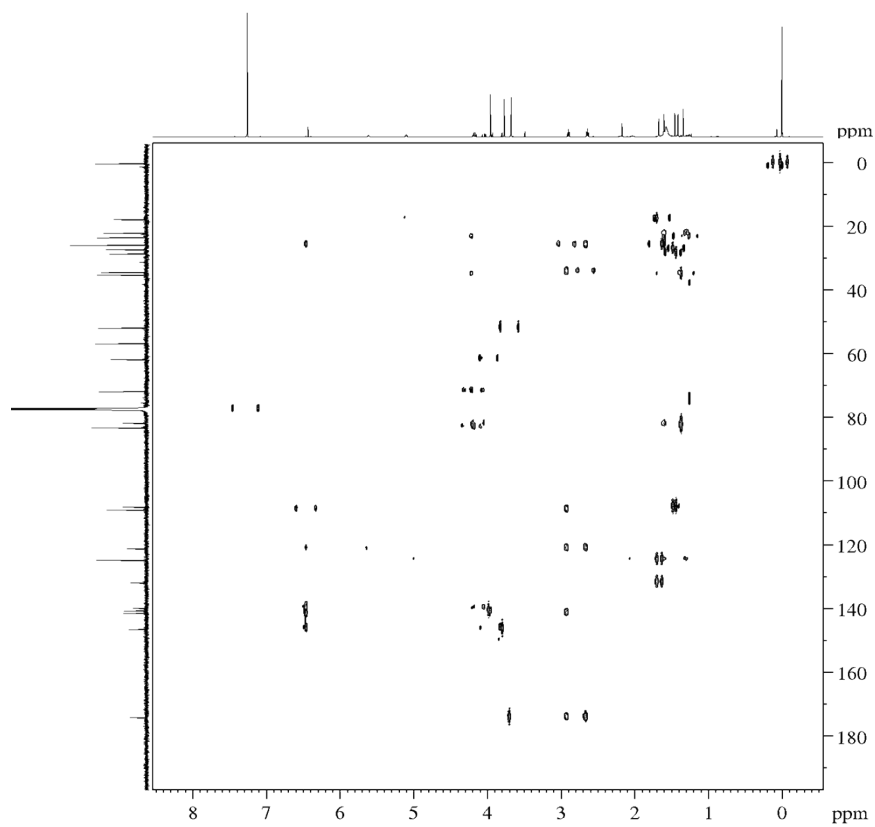

**Figure S2.11** HMBC spectrum (600 MHz, CDCl<sub>3</sub>) of compound **2a**

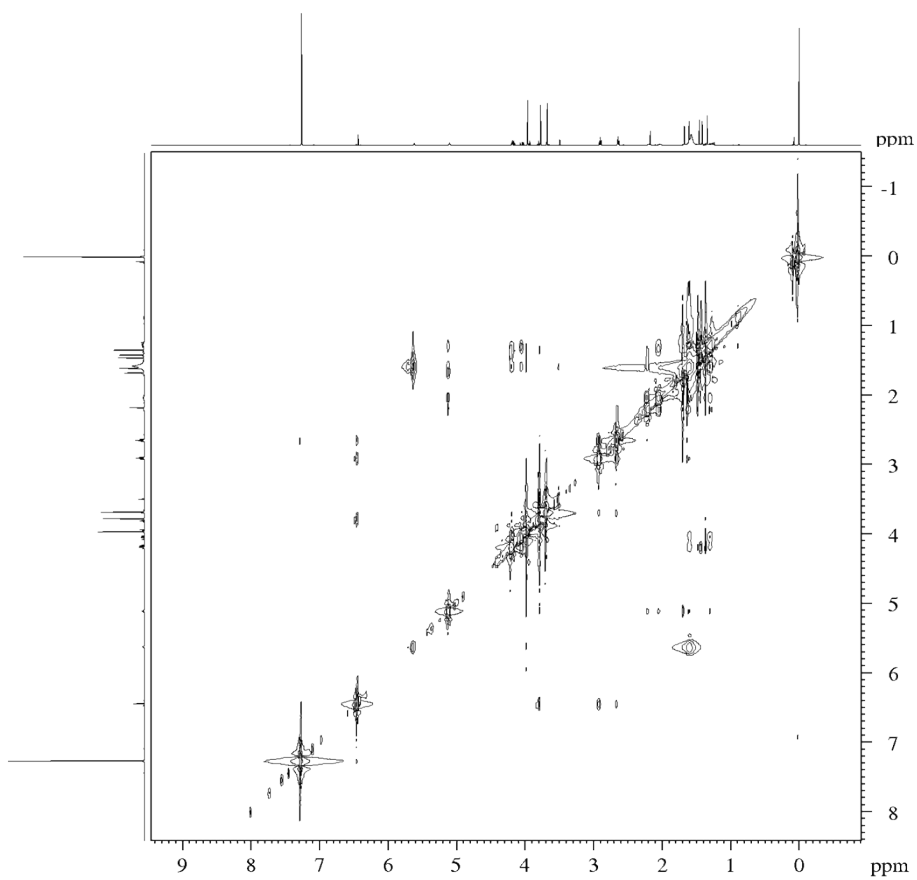

**Figure S2.12** NOESY spectrum of compound **2a**

# Spectrum Peak Pick Report

FIELD FIELD TEXT

Data Set: 没有

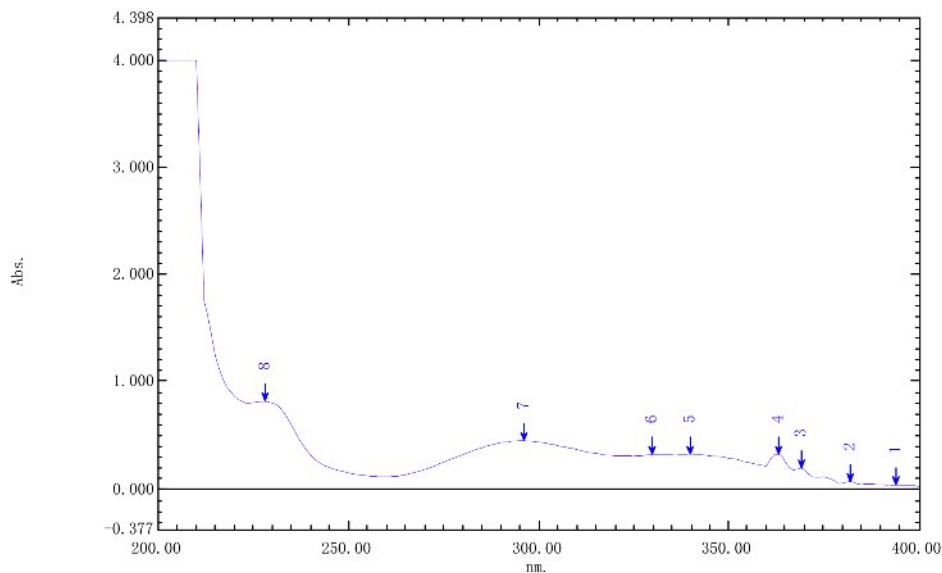

测定属性  
 波长范围 (nm.): 200.00到400.00  
 扫描速度: 中速  
 采样间隔: 1.0  
 自动采样间隔: 停用  
 扫描模式: 单的

试样准备属性  
 重量:  
 体积:  
 稀释:  
 光程长:  
 附加信息:

仪器属性  
 仪器类型: UV-1700  
 测定方式: 吸收值  
 狭缝宽: 1.0 nm  
 光源改变波长: 360.0 nm  
 S/R 转换: 标准

附件属性  
 附件: 无

| No. | P/V | Wavelength | Abs. | 描述 |
|-----|-----|------------|------|----|
| 1   | ●   | 394.00     | .035 |    |
| 2   | ●   | 382.00     | .064 |    |
| 3   | ●   | 369.00     | .193 |    |
| 4   | ●   | 363.00     | .316 |    |
| 5   | ●   | 340.00     | .324 |    |
| 6   | ●   | 330.00     | .317 |    |
| 7   | ●   | 296.00     | .448 |    |
| 8   | ●   | 228.00     | .816 |    |
| 9   | ●   | 392.00     | .026 |    |
| 10  | ●   | 379.00     | .046 |    |
| 11  | ●   | 367.00     | .177 |    |
| 12  | ●   | 360.00     | .210 |    |
| 13  | ●   | 332.00     | .317 |    |
| 14  | ●   | 325.00     | .303 |    |
| 15  | ●   | 260.00     | .112 |    |
| 16  | ●   | 224.00     | .799 |    |

FIELD TEXT

Fig. S3.1 UV spectrum of compound 3

## Single Mass Analysis

Tolerance = 10.0 PPM / DBE: min = -1.5, max = 50.0

Element prediction: Off

Number of isotope peaks used for i-FIT = 3

Monoisotopic Mass, Even Electron Ions

32 formula(e) evaluated with 1 results within limits (up to 50 closest results for each mass)

Elements Used:

C: 18-21 H: 0-50 O: 0-8 S: 0-1

DZK-27 68 (0.398) Cm (68)

1: TOF MS ES+

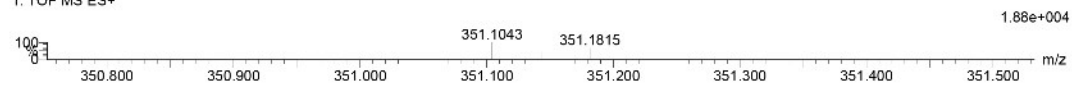

Minimum: -1.5  
Maximum: 20.0 10.0 50.0

| Mass     | Calc. Mass | mDa  | PPM  | DBE | i-FIT | Norm | Conf(%) | Formula    |
|----------|------------|------|------|-----|-------|------|---------|------------|
| 351.1438 | 351.1444   | -0.6 | -1.7 | 7.5 | 47.7  | n/a  | n/a     | C18 H23 O7 |

DZK-27 68 (0.398) Cm (68)

1: TOF MS ES+

100

351.1043

1.88e4

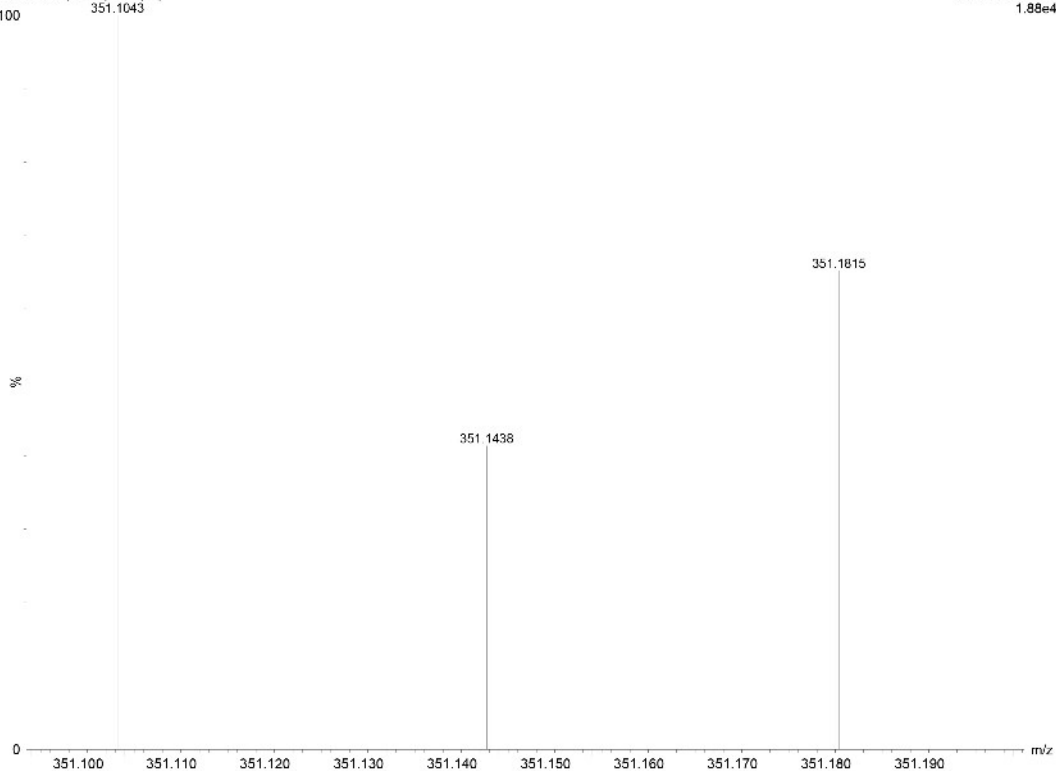

Fig. S3.2 HRESIMS spectrum of compound 3

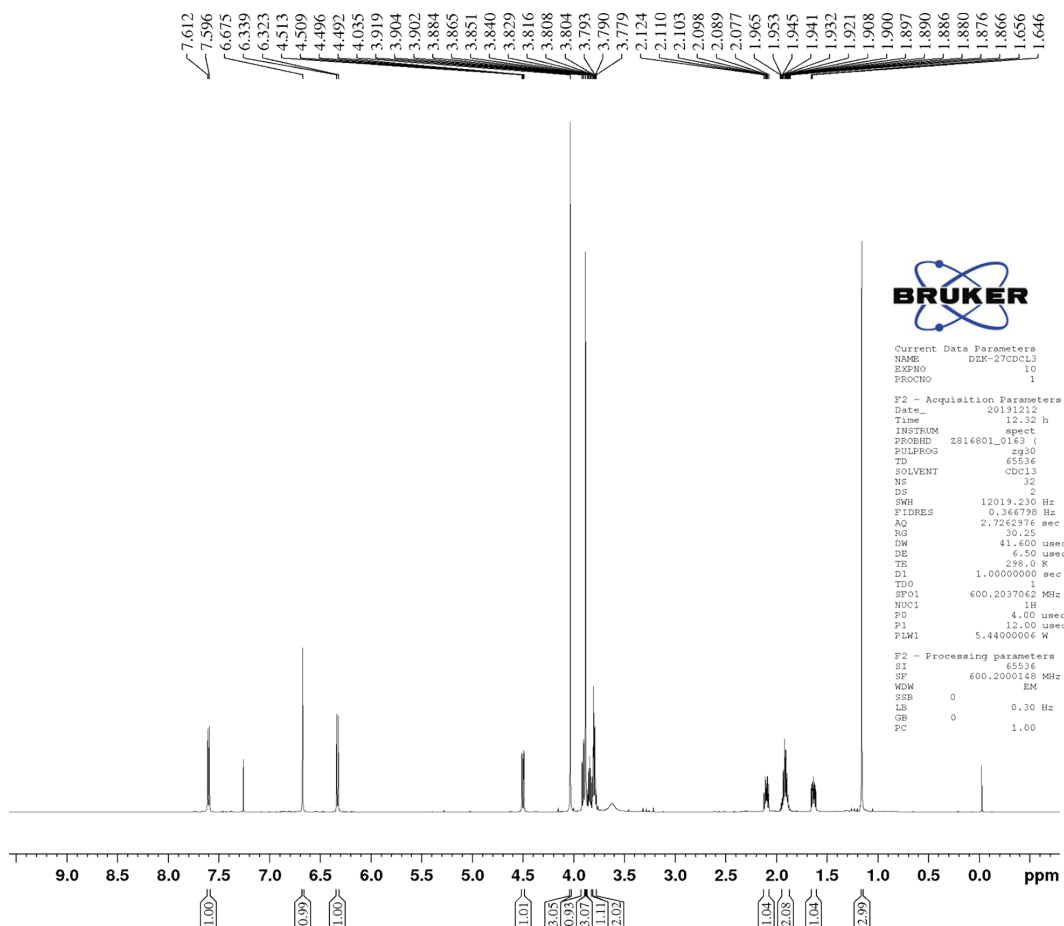

Fig. S3.3  $^1\text{H}$  NMR spectrum (600 MHz,  $\text{CDCl}_3$ ) of compound 3

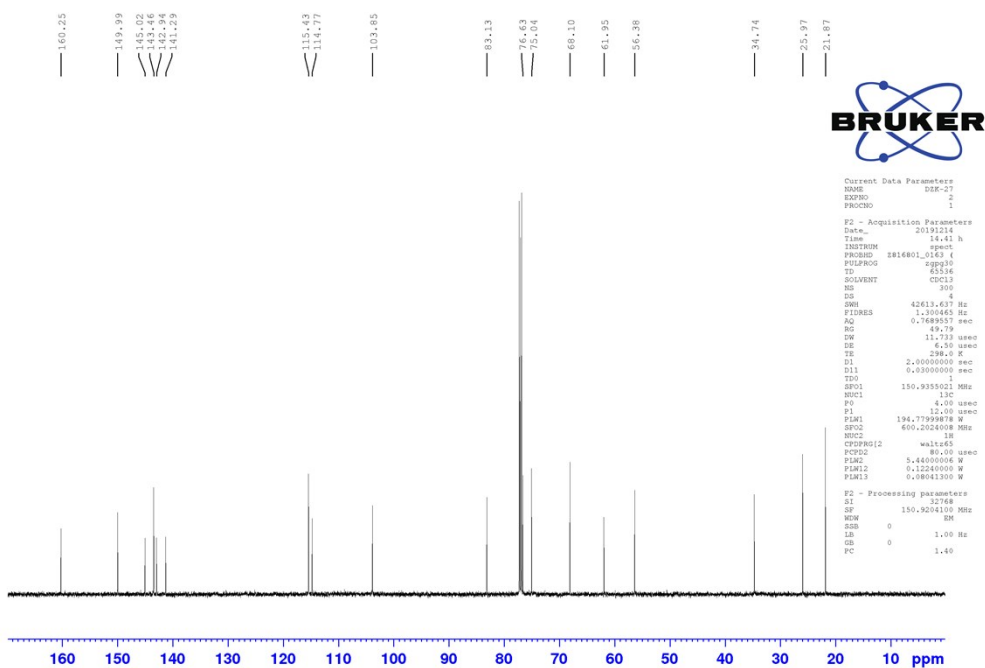

Figure S3.4  $^{13}\text{C}$  NMR spectrum (150 MHz,  $\text{CDCl}_3$ ) of compound 3

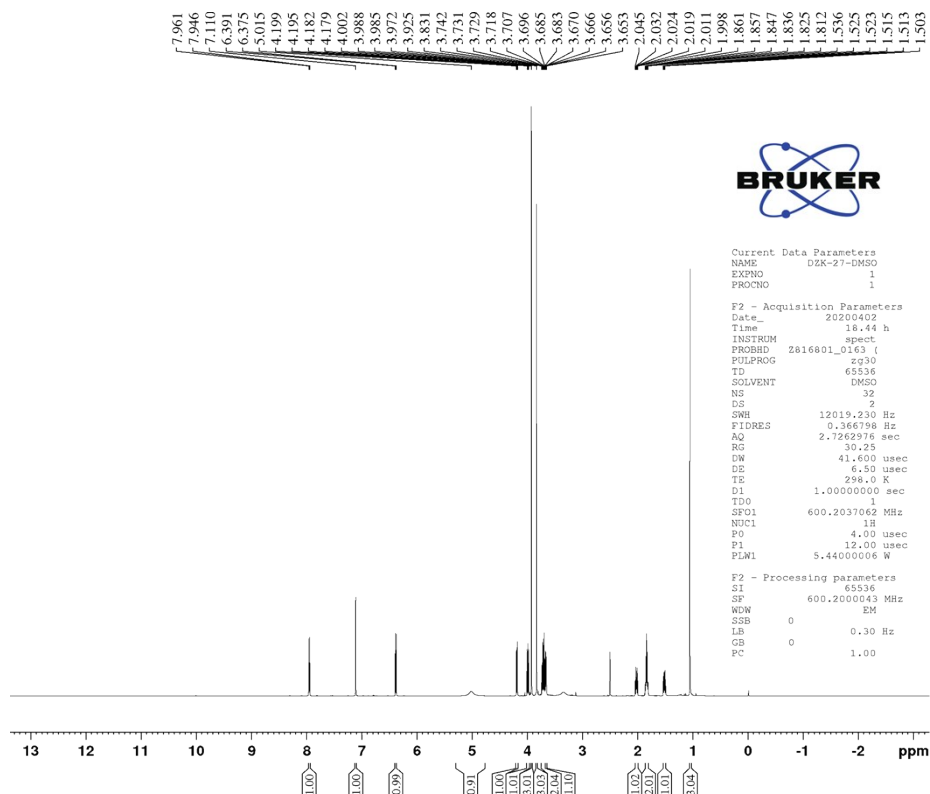

Fig. S3.5  $^1\text{H}$  NMR spectrum (600 MHz,  $\text{DMSO-}d_6$ ) of compound 3

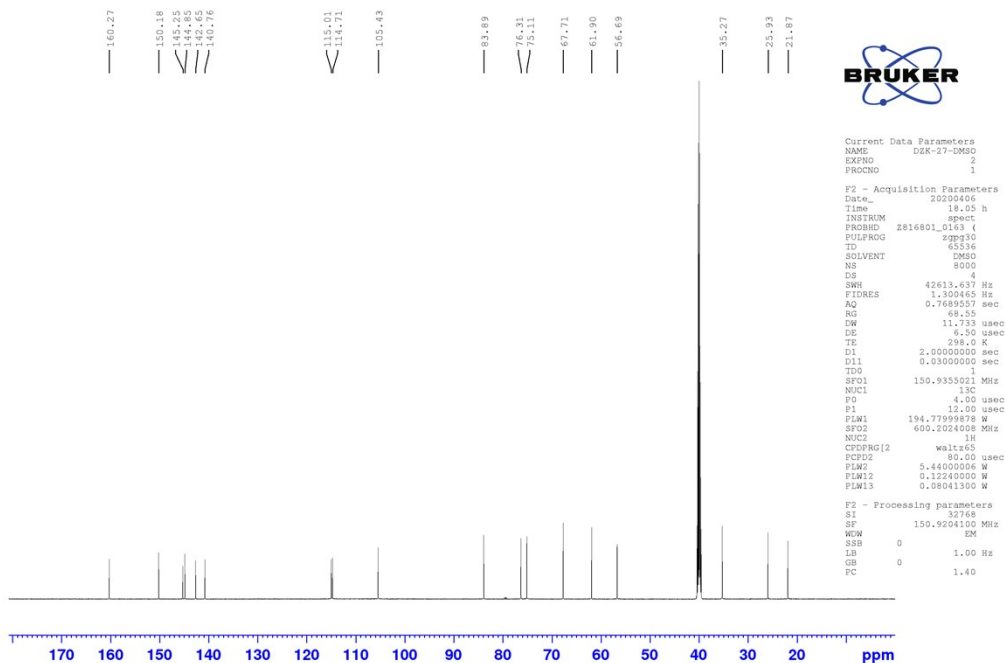

Figure S3.6  $^{13}\text{C}$  NMR spectrum (150 MHz,  $\text{DMSO-}d_6$ ) of compound 3

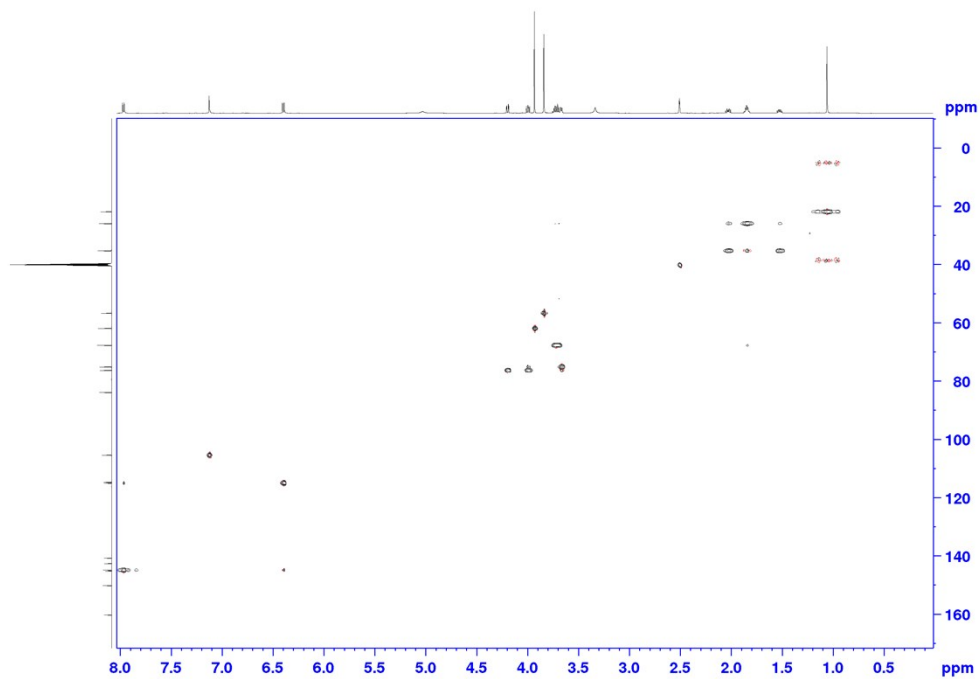

**Figure S3.7** HSQC spectrum (150 MHz, DMSO- $d_6$ ) of compound **3**

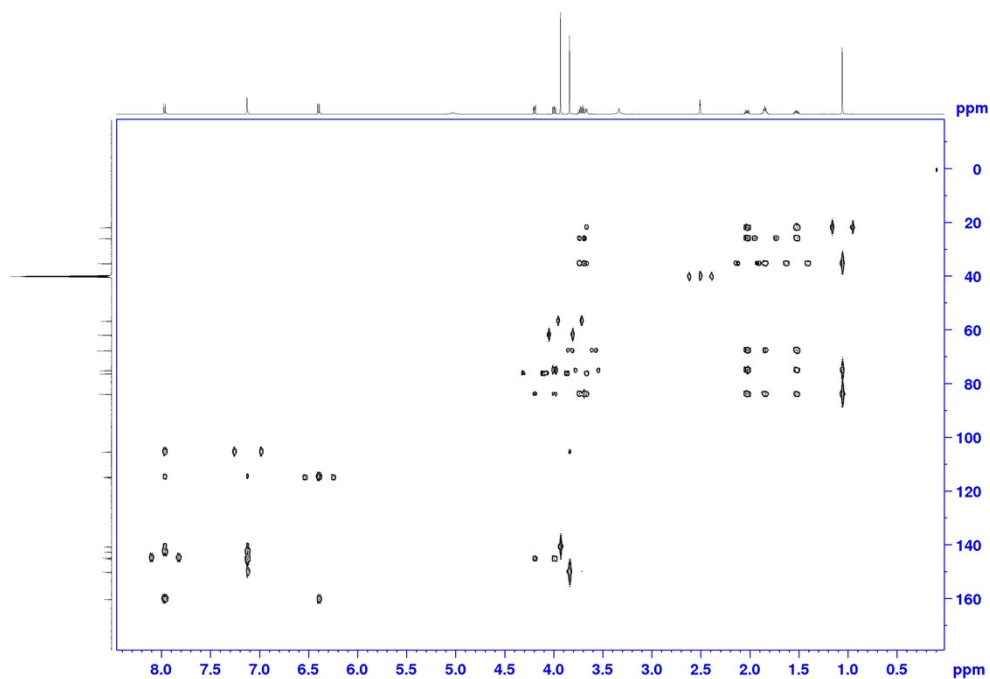

**Figure S3.8** HMBC spectrum (150 MHz, DMSO- $d_6$ ) of compound **3**





| Functional<br>B3LYP |      | Solvent?<br>PCM |          | Basis Set<br>6-311+ <i>c</i> (d, p) |          | Type of Data<br>Unscaled Shifts |          |
|---------------------|------|-----------------|----------|-------------------------------------|----------|---------------------------------|----------|
|                     |      | DP4+            | 0.00%    | 100.00%                             | -        | -                               | -        |
| Nuclei              | sp2? | Experimental    | Isomer 1 | Isomer 2                            | Isomer 3 | Isomer 4                        | Isomer 5 |
| C                   | x    | 159.8           | 174.9    | 175.0                               |          |                                 |          |
| C                   | x    | 149.7           | 166.9339 | 166.8152                            |          |                                 |          |
| C                   | x    | 144.8           | 165.0869 | 165.538                             |          |                                 |          |
| C                   | x    | 144.4           | 161.9222 | 162.3606                            |          |                                 |          |
| C                   | x    | 142.2           | 160.6986 | 160.8472                            |          |                                 |          |
| C                   | x    | 140.3           | 157.1928 | 157.062                             |          |                                 |          |
| C                   | x    | 114.5           | 129.9657 | 130.2141                            |          |                                 |          |
| C                   | x    | 114.2           | 128.0281 | 127.9499                            |          |                                 |          |
| C                   | x    | 105             | 117.0567 | 117.2583                            |          |                                 |          |
| C                   |      | 83.4            | 99.09457 | 99.06178                            |          |                                 |          |
| C                   |      | 75.8            | 94.1119  | 93.78059                            |          |                                 |          |
| C                   |      | 74.6            | 90.2547  | 90.61629                            |          |                                 |          |
| C                   |      | 67.2            | 82.1649  | 82.16784                            |          |                                 |          |
| C                   |      | 61.5            | 71.7203  | 71.58025                            |          |                                 |          |
| C                   |      | 56.2            | 65.71487 | 65.73771                            |          |                                 |          |
| C                   |      | 34.8            | 50.07366 | 45.83079                            |          |                                 |          |
| C                   |      | 25.5            | 39.66333 | 40.18812                            |          |                                 |          |
| C                   |      | 21.4            | 31.46886 | 36.3597                             |          |                                 |          |
| H                   | x    | 7.6             | 7.71836  | 7.73361                             |          |                                 |          |
| H                   | x    | 6.67            | 6.69335  | 6.65221                             |          |                                 |          |
| H                   | x    | 6.33            | 6.104    | 6.14962                             |          |                                 |          |
| H                   |      | 4.5             | 4.91778  | 4.91059                             |          |                                 |          |
| H                   |      | 4.03            | 4.47103  | 4.40674                             |          |                                 |          |
| H                   |      | 4.03            | 4.26026  | 4.18832                             |          |                                 |          |
| H                   |      | 4.03            | 4.07224  | 4.06286                             |          |                                 |          |
| H                   |      | 3.91            | 4.06789  | 3.97103                             |          |                                 |          |
| H                   |      | 3.88            | 3.85228  | 3.92898                             |          |                                 |          |
| H                   |      | 3.88            | 3.7734   | 3.89182                             |          |                                 |          |
| H                   |      | 3.88            | 3.7704   | 3.81882                             |          |                                 |          |
| H                   |      | 3.84            | 3.7623   | 3.76351                             |          |                                 |          |
| H                   |      | 3.8             | 3.73329  | 3.66965                             |          |                                 |          |
| H                   |      | 3.8             | 3.63924  | 3.63044                             |          |                                 |          |
| H                   |      | 2.1             | 3.41419  | 3.41201                             |          |                                 |          |
| H                   |      | 1.91            | 2.08571  | 2.11019                             |          |                                 |          |
| H                   |      | 1.63            | 1.78198  | 1.72141                             |          |                                 |          |
| H                   |      | 1.16            | 1.77546  | 1.71433                             |          |                                 |          |
| H                   |      | 1.16            | 1.57957  | 1.41128                             |          |                                 |          |
| H                   |      | 1.16            | 1.25057  | 1.35528                             |          |                                 |          |
| H                   |      | 1.05            | 0.77683  | 1.06572                             |          |                                 |          |
| H                   |      | 1.05            | 0.75846  | 1.05783                             |          |                                 |          |

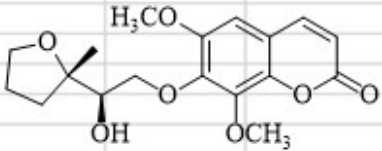

**3A (Isomer 1)**



**3B (Isomer 2)**

Figure S3.10 Results of DP4+ analysis of compound 3

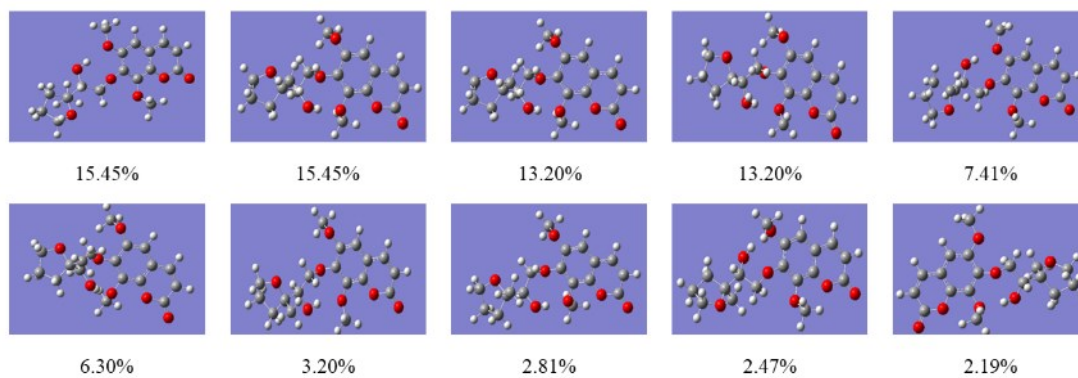

**Figure S3.11** The low-energy conformers of the **3a**

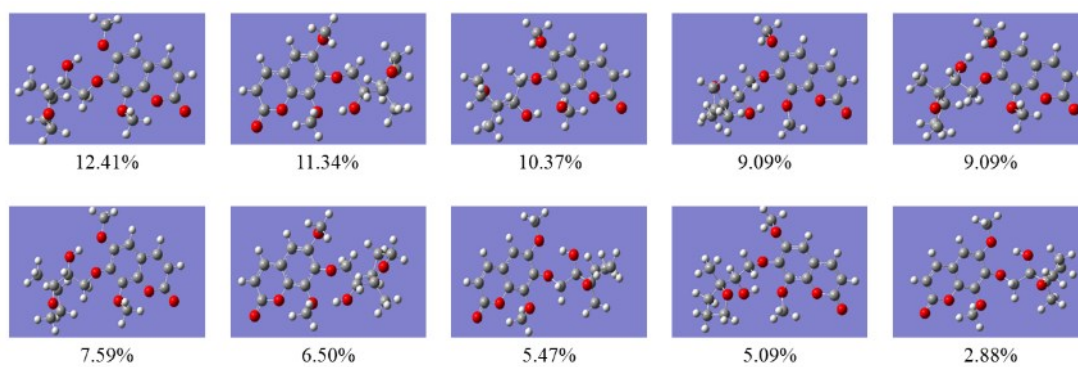

**Figure S3.12** The low-energy conformers of the **3b**

# Spectrum Peak Pick Report

FIELD FIELD TEXT

Data Set: 没有

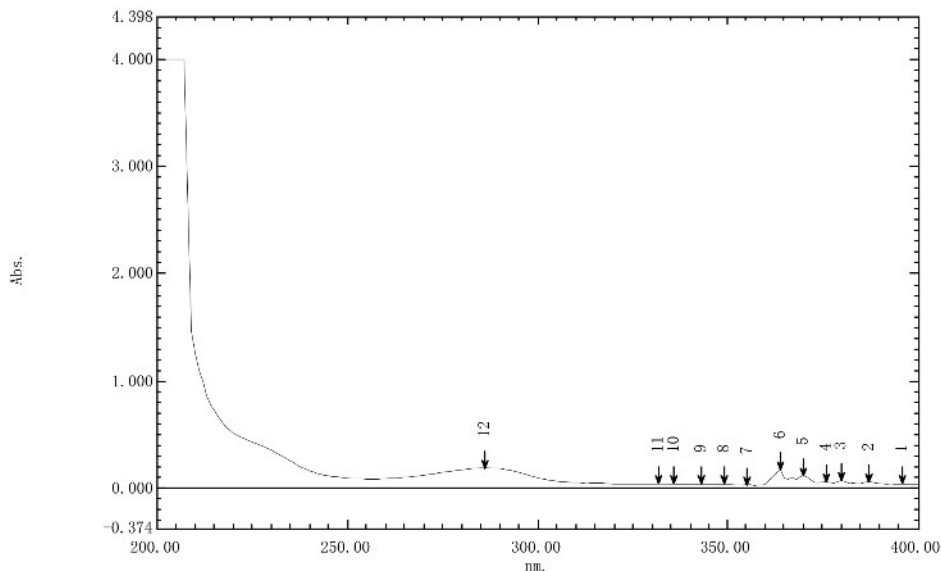

测定属性  
 波长范围 (nm.): 200.00到400.00  
 扫描速度: 中速  
 采样间隔: 1.0  
 自动采样间隔: 停用  
 扫描模式: 单一的

试样准备属性  
 重量:  
 体积:  
 稀释:  
 光程长:  
 附加信息:

仪器属性  
 仪器类型: UV-1700  
 测定方式: 吸收值  
 狭缝宽: 1.0 nm  
 光源改变波长: 360.0 nm  
 S/R 转换: 标准

附件属性  
 附件: 无

| No. | P/V | Wavelength | Abs. | 描述 |
|-----|-----|------------|------|----|
| 1   | ●   | 396.00     | .036 |    |
| 2   | ●   | 387.00     | .059 |    |
| 3   | ●   | 380.00     | .066 |    |
| 4   | ●   | 376.00     | .059 |    |
| 5   | ●   | 370.00     | .116 |    |
| 6   | ●   | 364.00     | .167 |    |
| 7   | ●   | 355.00     | .030 |    |
| 8   | ●   | 349.00     | .033 |    |
| 9   | ●   | 343.00     | .034 |    |
| 10  | ●   | 336.00     | .036 |    |
| 11  | ●   | 332.00     | .037 |    |
| 12  | ●   | 286.00     | .187 |    |
| 13  | ●   | 393.00     | .025 |    |
| 14  | ●   | 385.00     | .039 |    |
| 15  | ●   | 378.00     | .046 |    |
| 16  | ●   | 374.00     | .047 |    |
| 17  | ●   | 368.00     | .078 |    |
| 18  | ●   | 357.00     | .023 |    |
| 19  | ●   | 353.00     | .027 |    |
| 20  | ●   | 346.00     | .030 |    |
| 21  | ●   | 338.00     | .030 |    |
| 22  | ●   | 334.00     | .035 |    |
| 23  | ●   | 327.00     | .035 |    |
| 24  | ●   | 256.00     | .083 |    |

FIELD TEXT

Fig. S4.1 UV spectrum of compound 4

Single Mass Analysis

Tolerance = 10.0 PPM / DBE: min = -1.5, max = 50.0

Element prediction: Off

Number of isotope peaks used for i-FIT = 3

Monoisotopic Mass, Even Electron Ions

9 formula(e) evaluated with 1 results within limits (up to 50 closest results for each mass)

Elements Used:

C: 19-19 H: 0-50 O: 0-8

DZK-36 75 (0.434)

1: TOF MS ES+

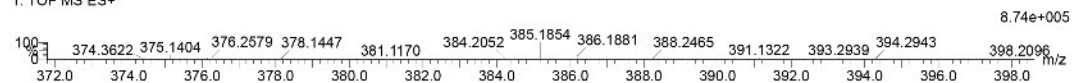

Minimum: -1.5  
Maximum: 20.0 10.0 50.0

| Mass     | Calc. Mass | mda  | PPM  | DBE | i-FIT | Norm | Conf(%) | Formula    |
|----------|------------|------|------|-----|-------|------|---------|------------|
| 385.1854 | 385.1862   | -0.8 | -2.1 | 5.5 | 890.9 | n/a  | n/a     | C19 H29 O8 |

DZK-36 75 (0.434)

100

385.1854

1: TOF MS ES+

8.74e5

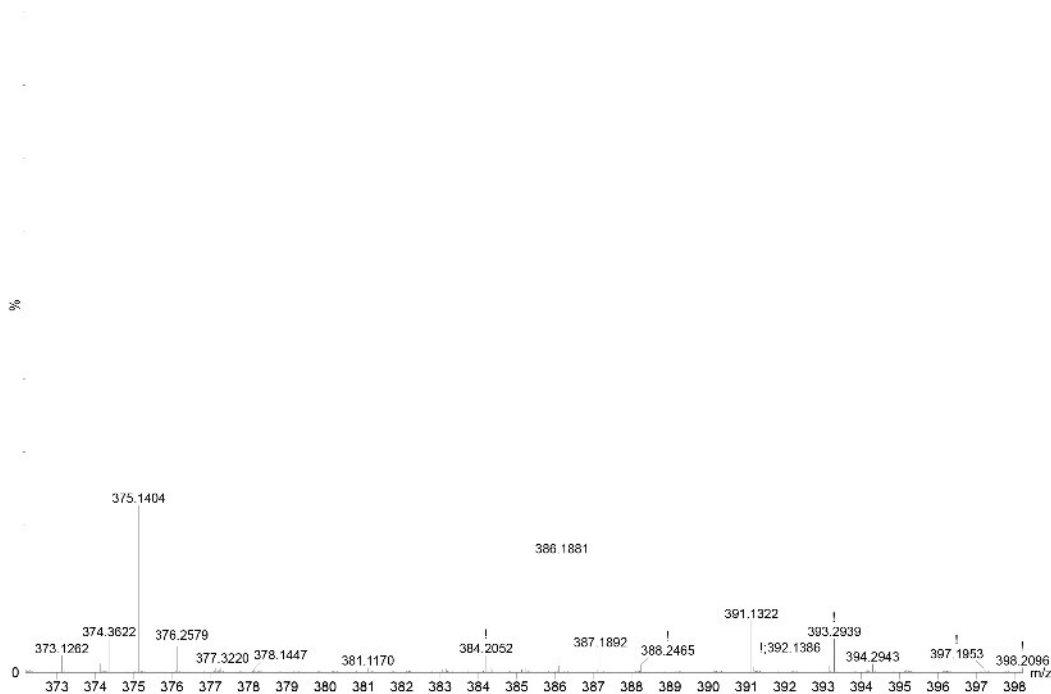

Fig. S4.2 HRESIMS spectrum of compound 4

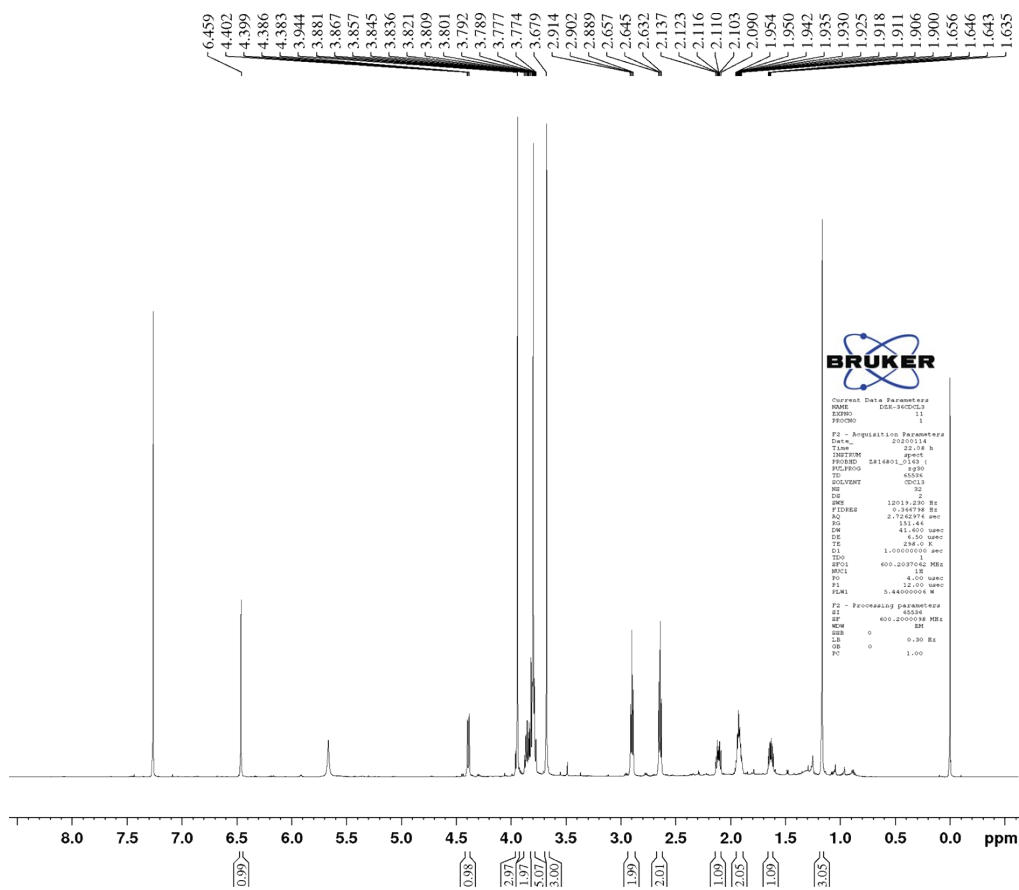

Fig. S4.3  $^1\text{H}$  NMR spectrum (600 MHz,  $\text{CDCl}_3$ ) of compound 4

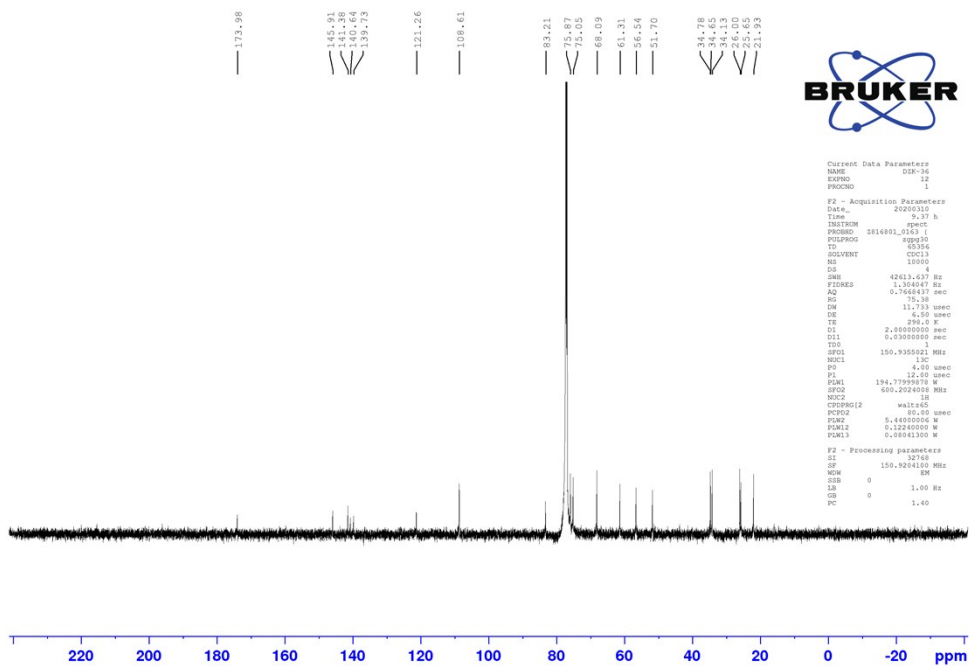

Figure S4.4  $^{13}\text{C}$  NMR spectrum (125 MHz,  $\text{CDCl}_3$ ) of compound 4

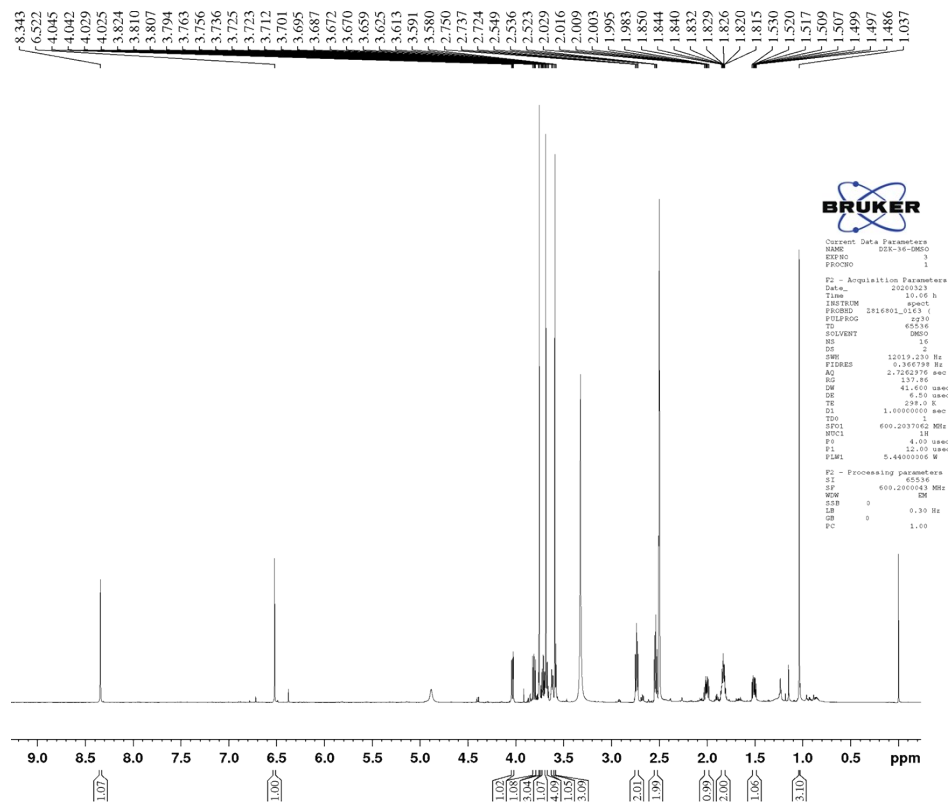

Figure S4.5  $^1\text{H}$  NMR spectrum (600 MHz,  $\text{DMSO-}d_6$ ) of compound 4

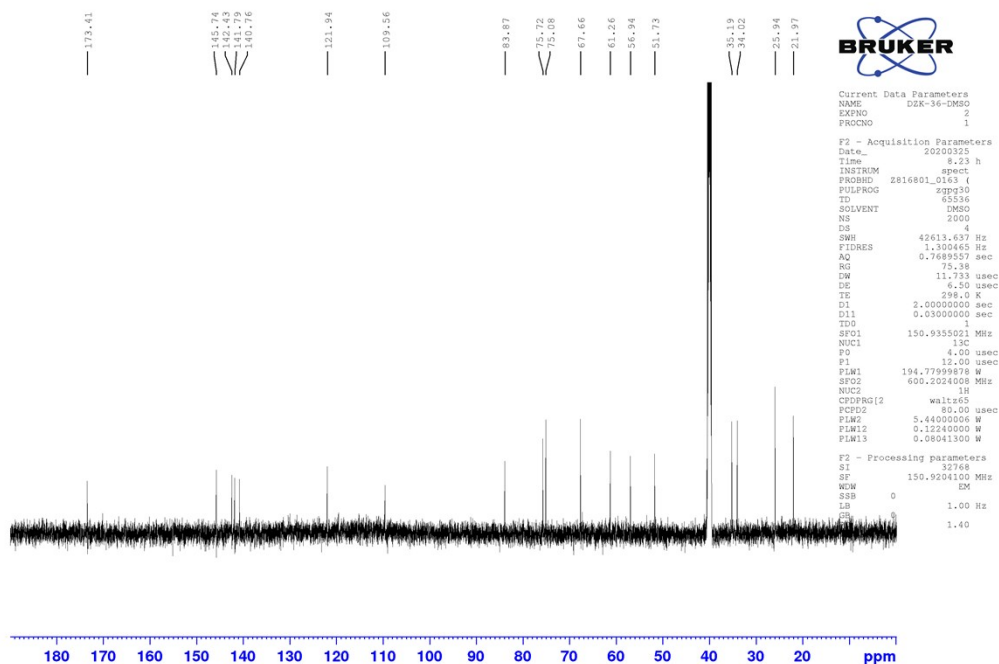

Figure S4.6  $^{13}\text{C}$  NMR spectrum (150 MHz,  $\text{DMSO-}d_6$ ) of compound 4

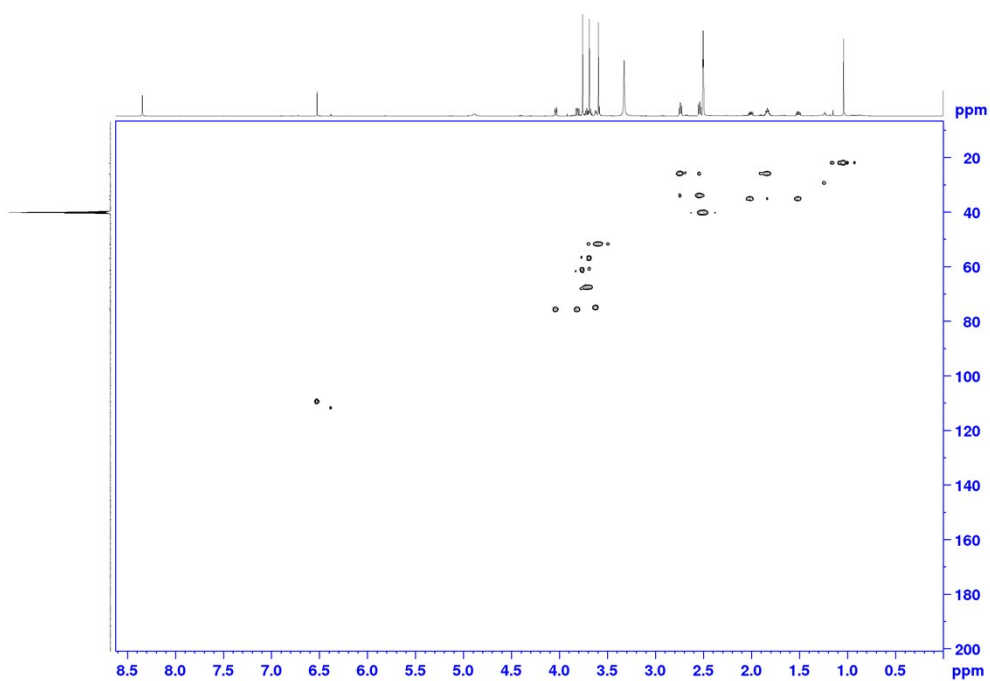

**Figure S4.7** HSQC spectrum (600 MHz, DMSO- $d_6$ ) of compound 4

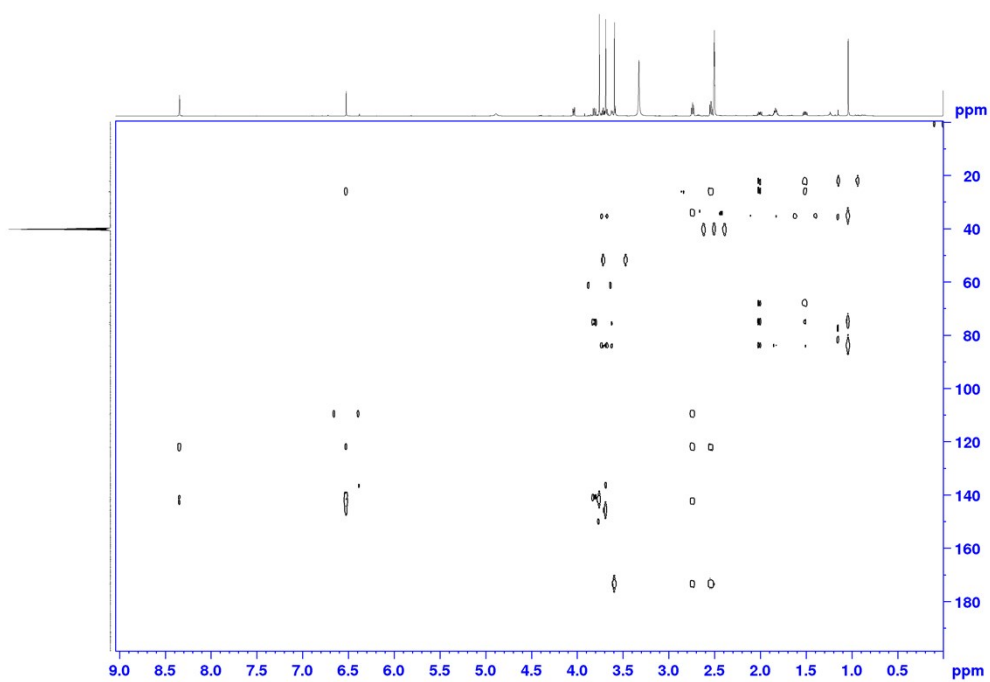

**Figure S4.8** HMBC spectrum (600 MHz, DMSO- $d_6$ ) of compound 4



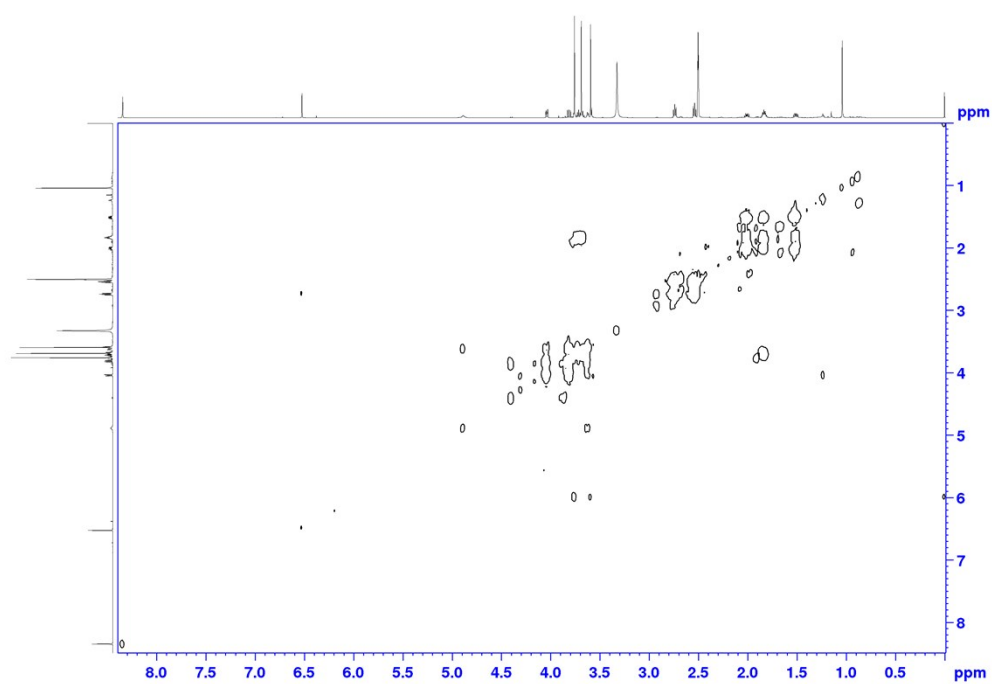

**Figure S4.9**  $^1\text{H}$ - $^1\text{H}$  COSY spectrum (600 MHz,  $\text{DMSO-}d_6$ ) of compound **4**

| Functional B3LYP |      | Solvent? PCM |          | Basis Set 6-311+G(d,p) |          | Type of Data Unscaled Shifts |          |
|------------------|------|--------------|----------|------------------------|----------|------------------------------|----------|
|                  |      | DP4+         | 0.00%    | 100.00%                | -        | -                            | -        |
| Nuclei           | sp2? | Experiment   | Isomer 1 | Isomer 2               | Isomer 3 | Isomer 4                     | Isomer 5 |
| C                | x    | 174.11       | 192.8    | 192.8                  |          |                              |          |
| C                | x    | 146.03       | 170.3584 | 170.327                |          |                              |          |
| C                | x    | 141.51       | 169.7085 | 169.955                |          |                              |          |
| C                | x    | 140.77       | 154.619  | 154.6937               |          |                              |          |
| C                | x    | 139.87       | 153.0821 | 152.4927               |          |                              |          |
| C                | x    | 121.86       | 117.4827 | 118.114                |          |                              |          |
| C                | x    | 108.74       | 117.4639 | 117.2879               |          |                              |          |
| C                |      | 83.35        | 98.76766 | 96.6766                |          |                              |          |
| C                |      | 76           | 92.9867  | 89.6866                |          |                              |          |
| C                |      | 75.18        | 90.19046 | 90.36065               |          |                              |          |
| C                |      | 68.22        | 82.02282 | 81.98159               |          |                              |          |
| C                |      | 61.45        | 65.53452 | 65.4296                |          |                              |          |
| C                |      | 56.67        | 65.37688 | 65.2725                |          |                              |          |
| C                |      | 51.84        | 63.01482 | 62.95871               |          |                              |          |
| C                |      | 34.78        | 50.67735 | 50.53293               |          |                              |          |
| C                |      | 34.26        | 50.28783 | 46.36262               |          |                              |          |
| C                |      | 26.13        | 44.61705 | 44.52254               |          |                              |          |
| C                |      | 25.78        | 39.707   | 40.63714               |          |                              |          |
| C                |      | 22.07        | 31.35834 | 36.37506               |          |                              |          |
| H                | x    | 6.46         | 6.49893  | 6.54602                |          |                              |          |
| H                |      | 4.39         | 4.8662   | 4.88804                |          |                              |          |
| H                |      | 3.94         | 4.41917  | 4.37661                |          |                              |          |
| H                |      | 3.94         | 4.05364  | 4.04149                |          |                              |          |
| H                |      | 3.94         | 3.9679   | 3.93475                |          |                              |          |
| H                |      | 3.85         | 3.8398   | 3.84429                |          |                              |          |
| H                |      | 3.8          | 3.74739  | 3.73117                |          |                              |          |
| H                |      | 3.8          | 3.71874  | 3.70427                |          |                              |          |
| H                |      | 3.8          | 3.71593  | 3.67153                |          |                              |          |
| H                |      | 3.8          | 3.67508  | 3.64635                |          |                              |          |
| H                |      | 3.78         | 3.61909  | 3.63119                |          |                              |          |
| H                |      | 3.68         | 3.61204  | 3.61104                |          |                              |          |
| H                |      | 3.68         | 3.6088   | 3.60252                |          |                              |          |
| H                |      | 3.68         | 3.59345  | 3.5944                 |          |                              |          |
| H                |      | 2.9          | 3.45283  | 3.44383                |          |                              |          |
| H                |      | 2.9          | 2.95583  | 3.03333                |          |                              |          |
| H                |      | 2.64         | 2.65457  | 2.68096                |          |                              |          |
| H                |      | 2.64         | 2.61478  | 2.5945                 |          |                              |          |
| H                |      | 2.11         | 2.45723  | 2.46365                |          |                              |          |
| H                |      | 1.93         | 2.44626  | 2.43119                |          |                              |          |
| H                |      | 1.93         | 2.02228  | 2.03543                |          |                              |          |
| H                |      | 1.64         | 1.78861  | 1.75635                |          |                              |          |
| H                |      | 1.16         | 1.77864  | 1.64419                |          |                              |          |
| H                |      | 1.16         | 1.61697  | 1.48514                |          |                              |          |
| H                |      | 1.16         | 1.31765  | 1.35825                |          |                              |          |

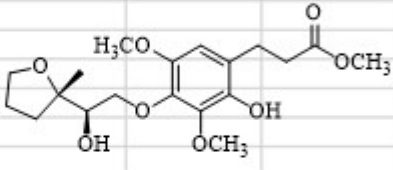

**4A (Isomer 1)**



**4B (Isomer 2)**

Figure S4.10 Results of DP4+ analysis of compound 4

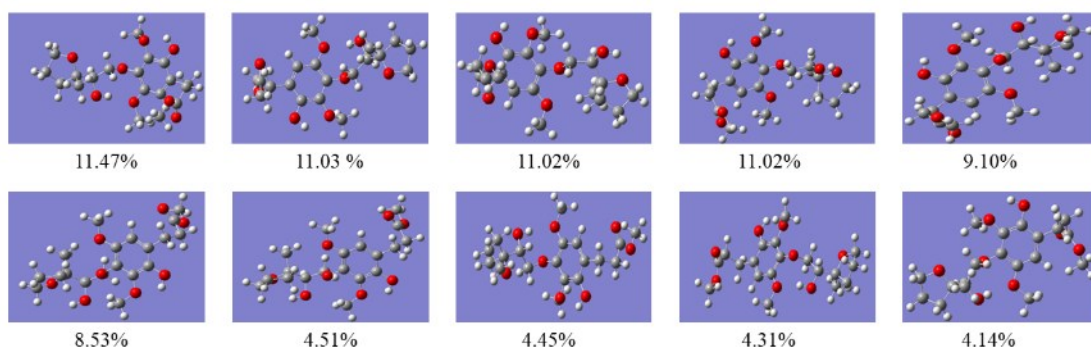

**Figure S4.11** The low-energy conformers of the **4a**

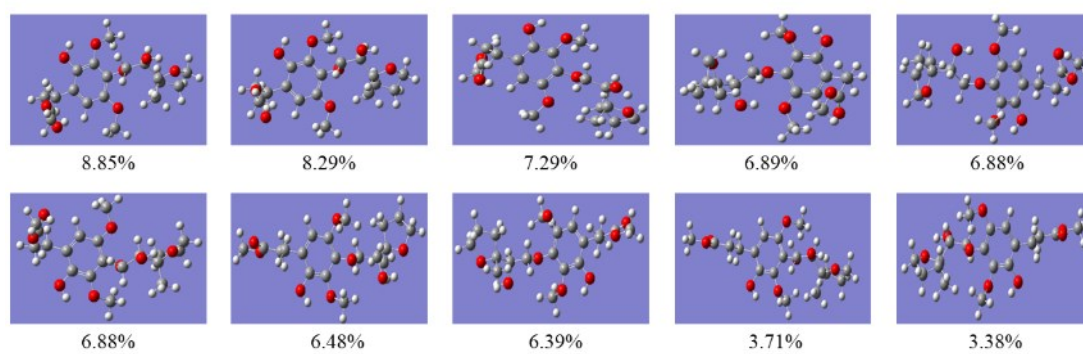

**Figure S4.12** The low-energy conformers of the **4b**

# Spectrum Peak Pick Report

FIELD FIELD TEXT

Data Set: 没有

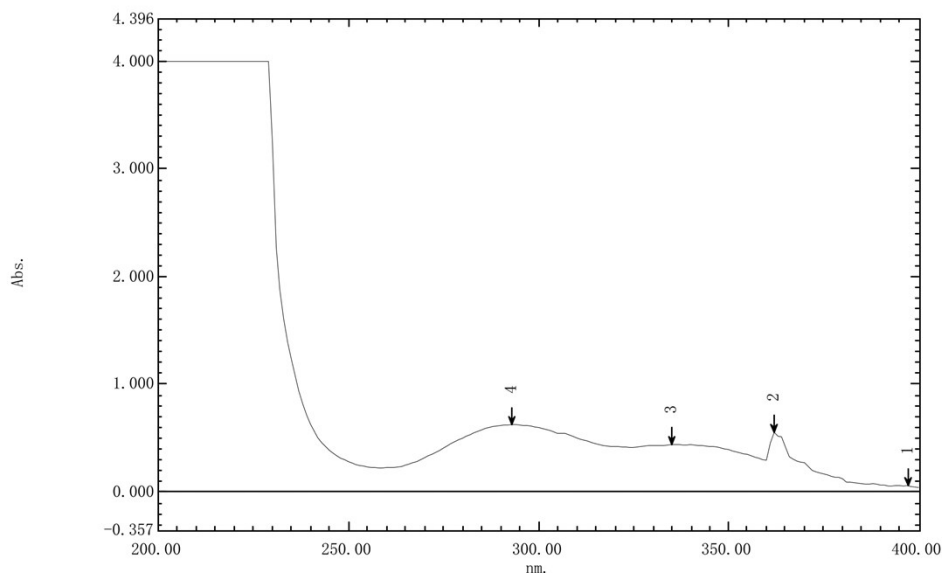

测定属性  
波长范围 (nm.): 200.00到400.00  
扫描速度: 中速  
采样间隔: 1.0  
自动采样间隔: 停用  
扫描模式: 单一的

试样准备属性  
重量:  
体积:  
稀释:  
光程长:  
附加信息:

仪器属性  
仪器类型: UV-1700  
测定方式: 吸收值  
狭缝宽: 1.0 nm  
光源改变波长: 360.0 nm  
S/R 转换: 标准

附件属性  
附件: 无

| No. | P/V | Wavelength | Abs. | 描述 |
|-----|-----|------------|------|----|
| 1   | ⊕   | 397.00     | .057 |    |
| 2   | ⊕   | 362.00     | .552 |    |
| 3   | ⊕   | 335.00     | .437 |    |
| 4   | ⊕   | 293.00     | .622 |    |
| 5   | ⊕   | 392.00     | .050 |    |
| 6   | ⊕   | 360.00     | .291 |    |
| 7   | ⊕   | 325.00     | .411 |    |
| 8   | ⊕   | 259.00     | .220 |    |

FIELD TEXT

Figure S5.1 UV spectrum of compound 5

## Mass Spectrum Molecular Formula Report

|                      |                                                |                   |                       |
|----------------------|------------------------------------------------|-------------------|-----------------------|
| <b>Analysis Info</b> |                                                | Acquisition Date  | 4/30/2019 12:44:58 PM |
| Analysis Name        | D:\Data\20190430CEYANG\AAS-65_1-D_3_01_13688.d | Instrument / Ser# | Bruker Customer       |
| Method               | 20190425yezhi.m                                | Operator          | microTOF-Q 125        |
| Sample Name          | AAS-65                                         |                   |                       |
| Comment              |                                                |                   |                       |

|                              |          |                       |           |
|------------------------------|----------|-----------------------|-----------|
| <b>Acquisition Parameter</b> |          |                       |           |
| Source Type                  | ESI      | Ion Polarity          | Positive  |
| Focus                        | Active   | Set Capillary         | 4500 V    |
| Scan Begin                   | 50 m/z   | Set End Plate Offset  | -500 V    |
| Scan End                     | 1500 m/z | Set Collision Cell RF | 400.0 Vpp |
|                              |          | Set Nebulizer         | 1.2 Bar   |
|                              |          | Set Dry Heater        | 180 °C    |
|                              |          | Set Dry Gas           | 8.0 l/min |
|                              |          | Set Divert Valve      | Source    |

**Generate Molecular Formula Parameter**

|                  |  |                        |  |         |  |
|------------------|--|------------------------|--|---------|--|
| Formula, min.    |  | Tolerance              |  | Charge  |  |
| Formula, max.    |  | Minimum                |  | Maximum |  |
| Measured m/z     |  | Electron Configuration |  | Maximum |  |
| Check Valence    |  | Minimum                |  |         |  |
| Nitrogen Rule    |  |                        |  |         |  |
| Filter H/C Ratio |  |                        |  |         |  |
| Estimate Carbon  |  |                        |  |         |  |

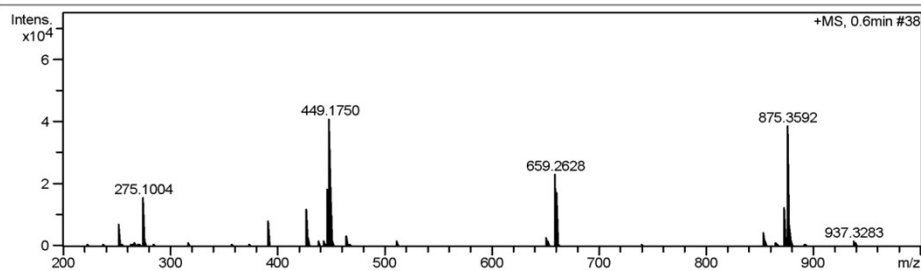

**Figure S5.2 HRESIMS spectrum of compound 5**

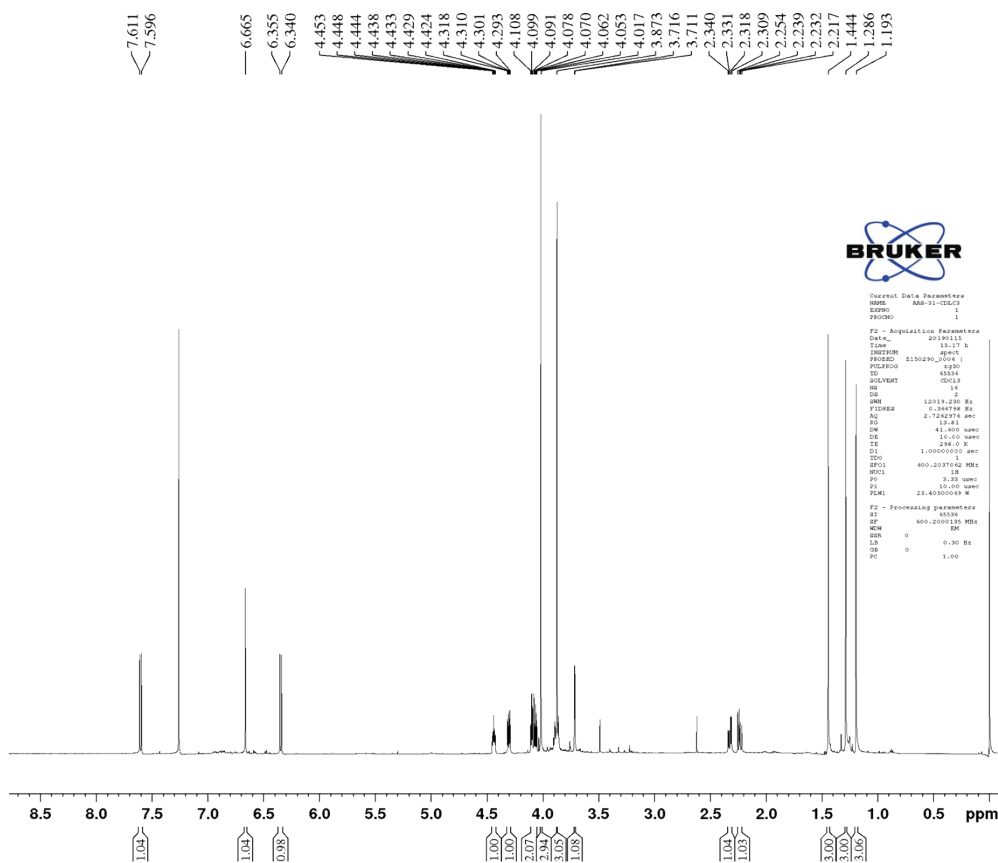

**Figure S5.3 <sup>1</sup>H NMR spectrum (600 MHz, CDCl<sub>3</sub>) of compound 5**

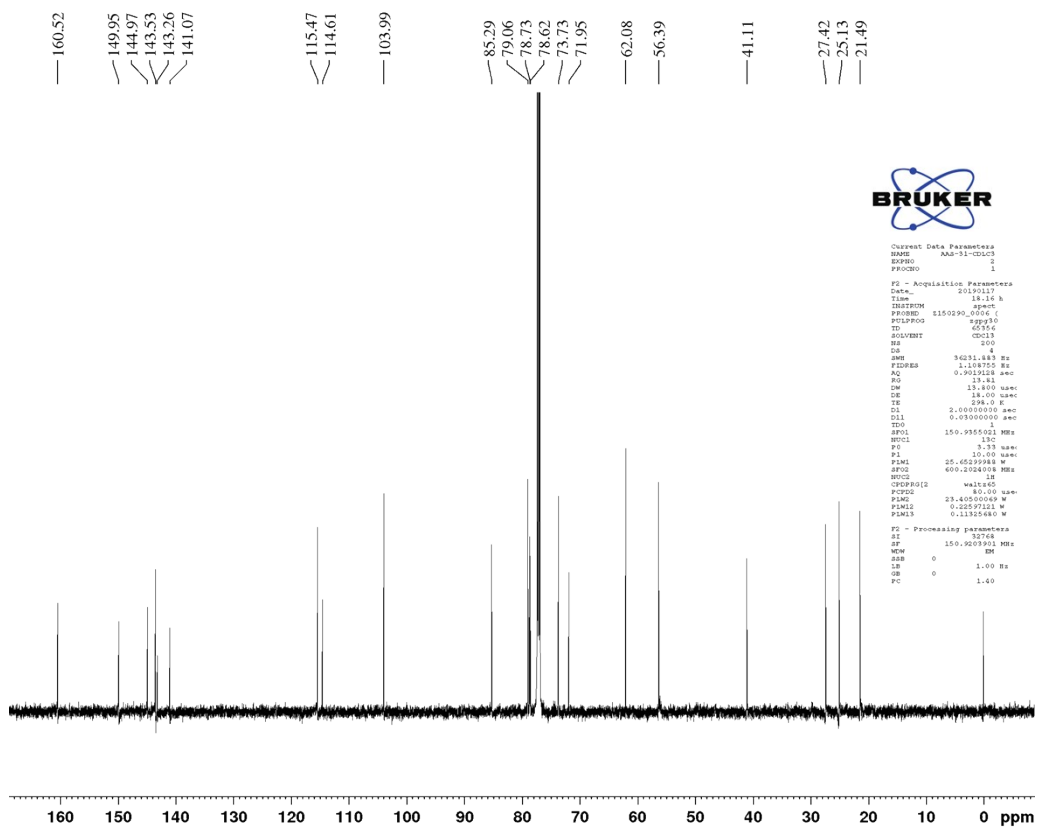

Figure S5.4  $^{13}\text{C}$  NMR spectrum (150 MHz,  $\text{CDCl}_3$ ) of compound **5**

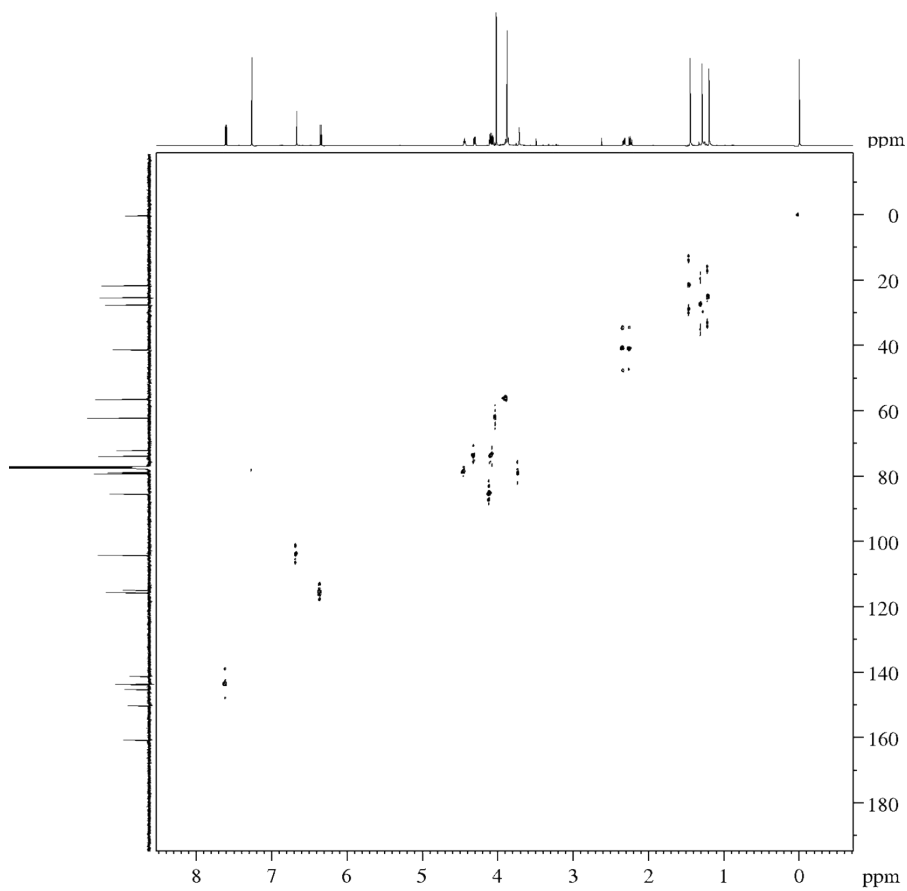

Figure S5.5 HSQC spectrum (600 MHz,  $\text{CDCl}_3$ ) of compound **5**

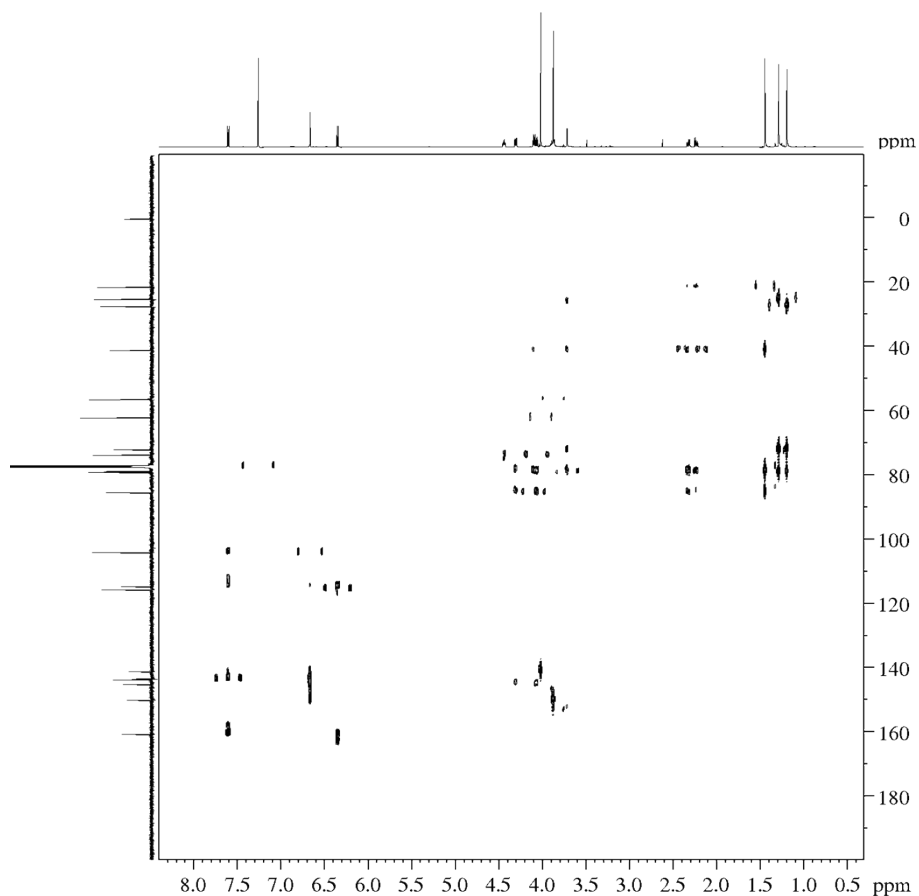

Figure S5.6 HMBC spectrum (600 MHz, CDCl<sub>3</sub>) of compound 5

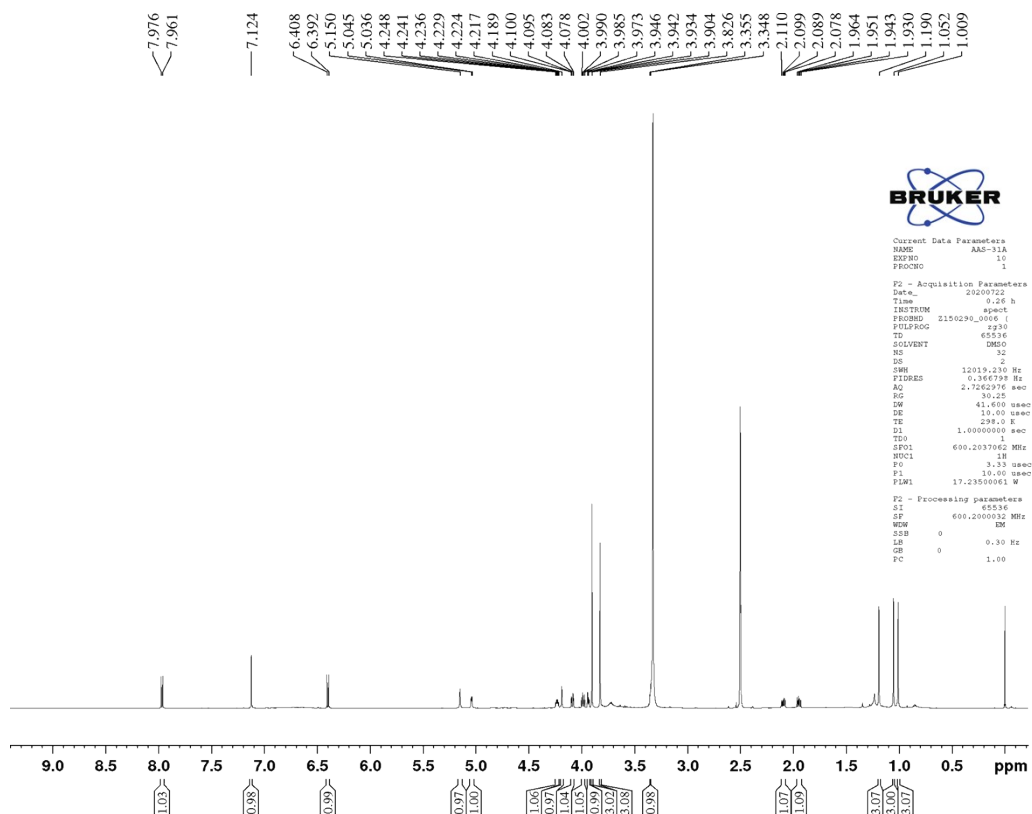

Figure S5.7 <sup>1</sup>H NMR spectrum (600 MHz, DMSO-*d*<sub>6</sub>) of compound 5

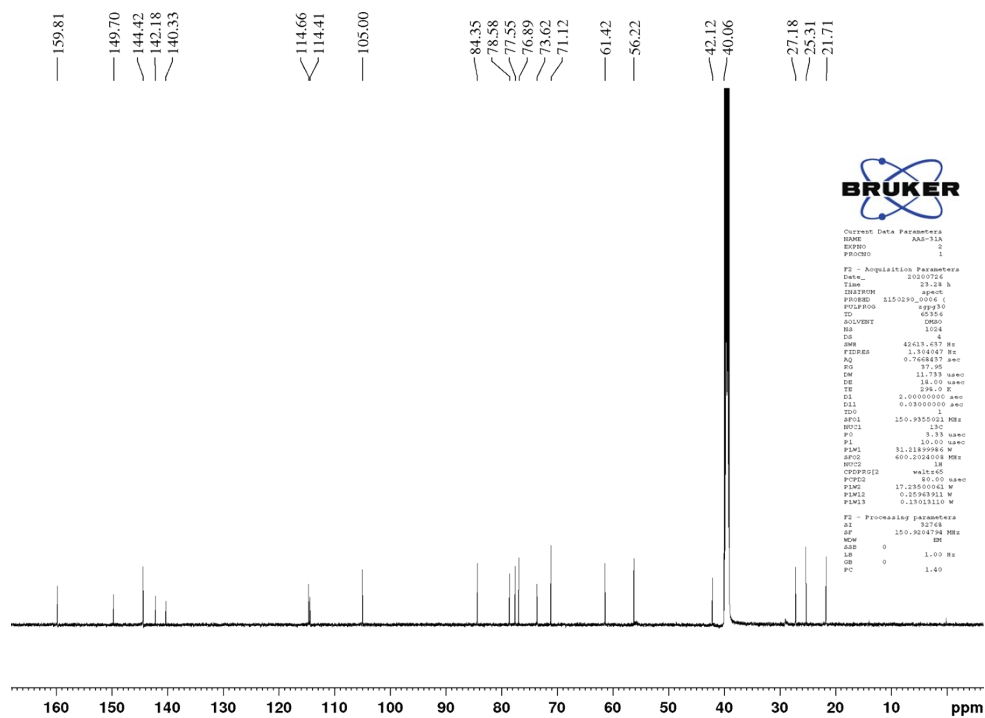

Figure S5.8  $^{13}\text{C}$  NMR spectrum (150 MHz,  $\text{DMSO-}d_6$ ) of compound **5**

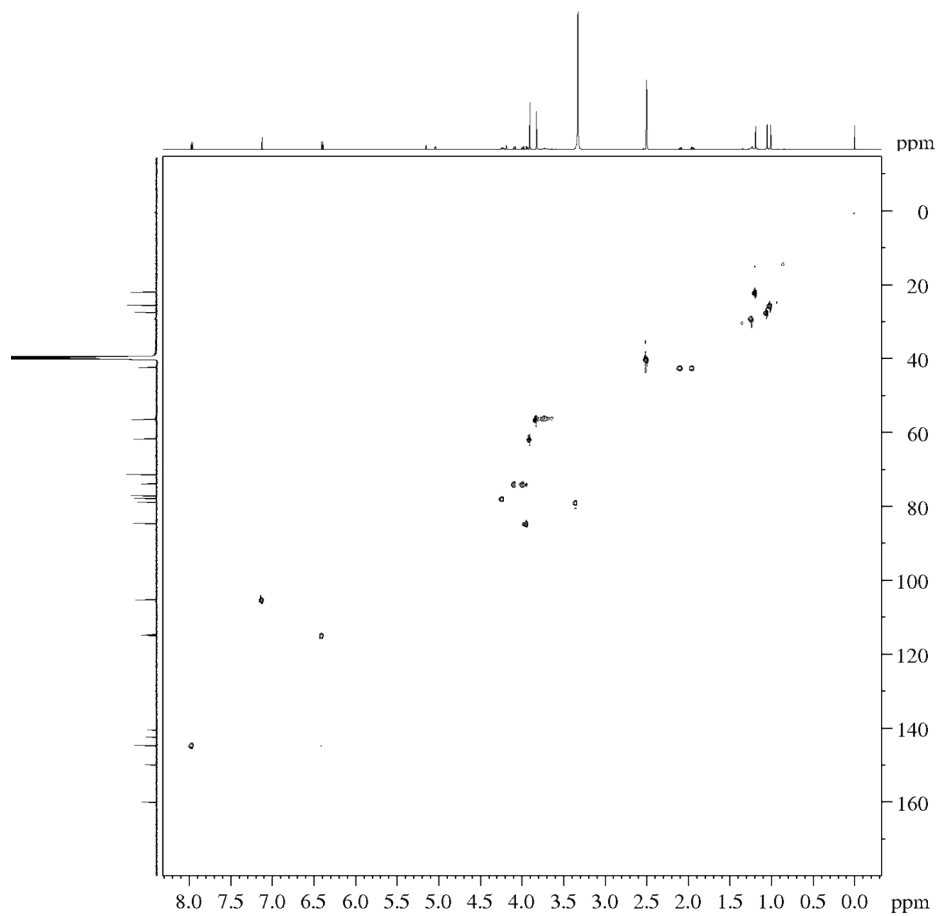

Figure S5.9 HSQC spectrum (600 MHz,  $\text{DMSO-}d_6$ ) of compound **5**



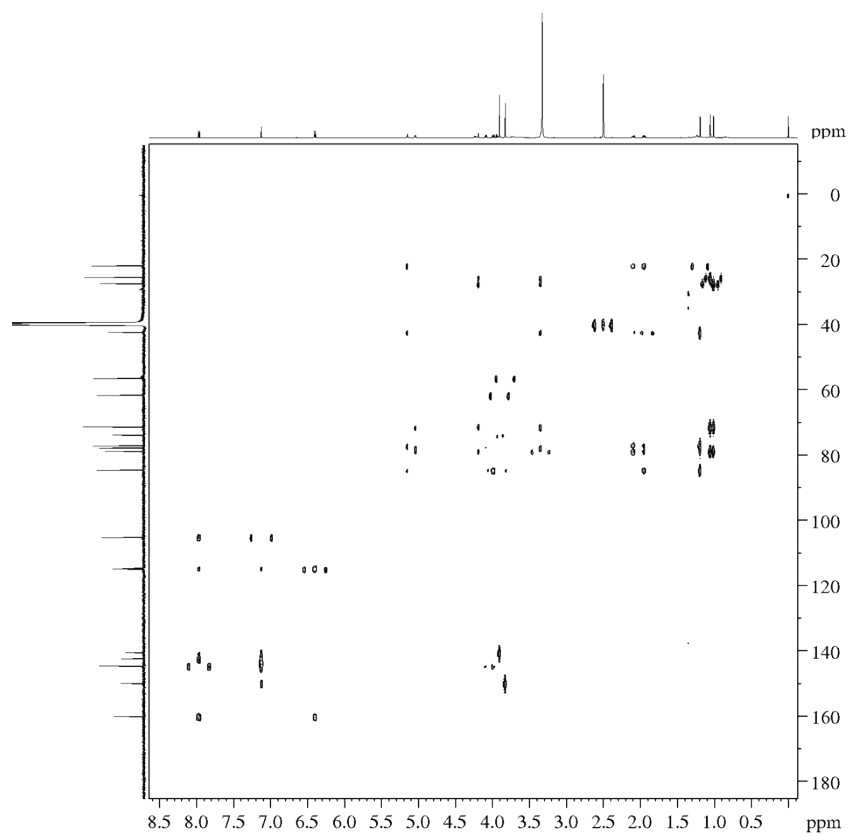

**Figure S5.10** HMBC spectrum (600 MHz,  $\text{DMSO-}d_6$ ) of compound **5**

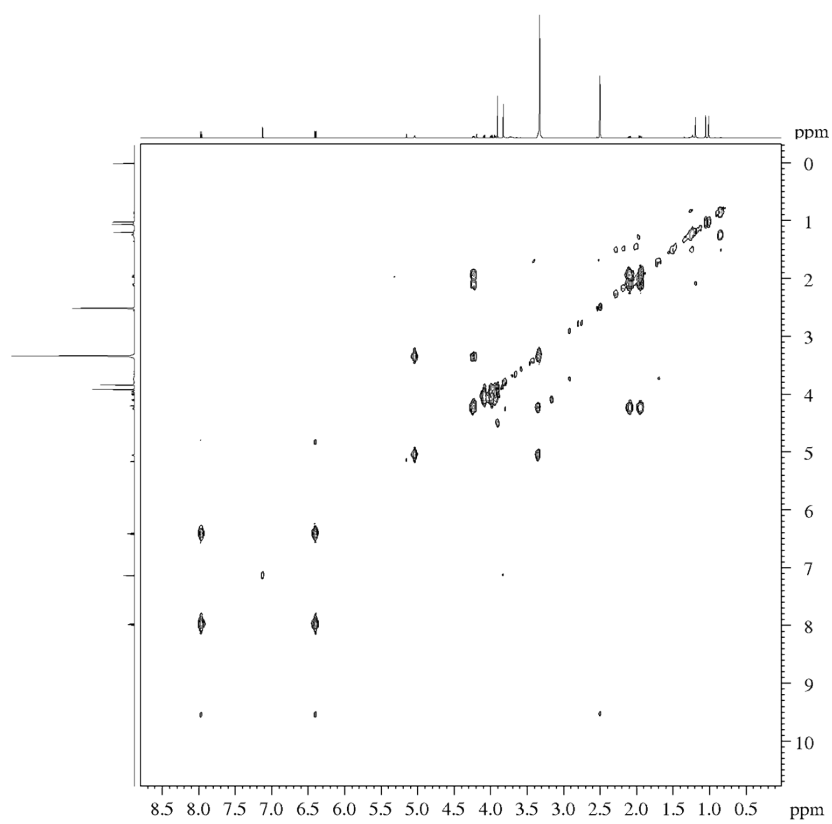

**Figure S5.11**  $^1\text{H}$ - $^1\text{H}$  COSY spectrum (600 MHz,  $\text{DMSO-}d_6$ ) of compound **5**

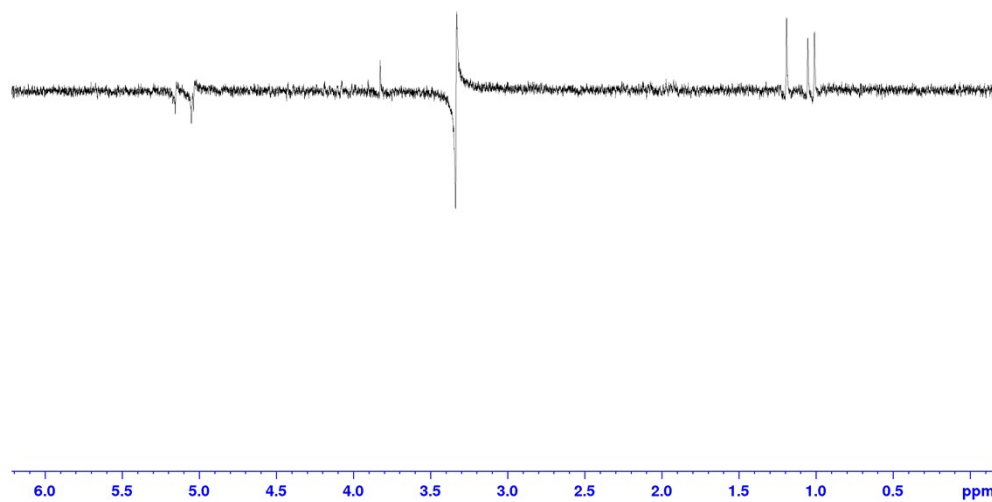

**Figure S5.12** 1D NOESY spectrum (600 MHz, DMSO- $d_6$ ) of compound **5**: selective excitation at  $\delta_{\text{H}}$  5.12 (5'-OH), full spectrum

| Functional B3LYP |      | Solvent? PCM |             | Basis Set 6-311+G (d, p) |          | Type of Data Unscaled Shifts |          |
|------------------|------|--------------|-------------|--------------------------|----------|------------------------------|----------|
|                  |      | DP4+         | 0.00%       | 100.00%                  | -        | -                            | -        |
| Nuclei           | sp2? | Experiment   | Isomer 1    | Isomer 2                 | Isomer 3 | Isomer 4                     | Isomer 5 |
| C                | x    | 160.52       | 168.2       | 168.3                    |          |                              |          |
| C                | x    | 149.95       | 158.0048    | 158.0329                 |          |                              |          |
| C                | x    | 144.97       | 156.6379    | 156.1129                 |          |                              |          |
| C                | x    | 143.54       | 154.8346    | 153.9685                 |          |                              |          |
| C                | x    | 143.26       | 153.4626    | 153.3754                 |          |                              |          |
| C                | x    | 141.07       | 150.228     | 150.2183                 |          |                              |          |
| C                | x    | 115.47       | 150.0541    | 122.9936                 |          |                              |          |
| C                | x    | 114.61       | 119.8703    | 120.3344                 |          |                              |          |
| C                | x    | 103.99       | 111.1762    | 109.1907                 |          |                              |          |
| C                |      | 85.29        | 94.40885309 | 94.40885309              |          |                              |          |
| C                |      | 79.06        | 90.85250608 | 90.85250608              |          |                              |          |
| C                |      | 78.73        | 84.63819817 | 84.63819817              |          |                              |          |
| C                |      | 78.62        | 81.95009739 | 81.95009739              |          |                              |          |
| C                |      | 73.73        | 80.06880265 | 80.06880265              |          |                              |          |
| C                |      | 71.95        | 78.83146441 | 78.83146441              |          |                              |          |
| C                |      | 62.08        | 63.45079407 | 63.45079407              |          |                              |          |
| C                |      | 56.4         | 58.10961073 | 58.10961073              |          |                              |          |
| C                |      | 41.11        | 47.36325484 | 47.36325484              |          |                              |          |
| C                |      | 27.43        | 27.3492086  | 27.3492086               |          |                              |          |
| C                |      | 25.13        | 26.43771076 | 26.43771076              |          |                              |          |
| C                |      | 21.5         | 26.08646431 | 26.08646431              |          |                              |          |
| H                | x    | 7.97         | 8.97        | 8.7839                   |          |                              |          |
| H                | x    | 7.12         | 7.9166      | 8.2284                   |          |                              |          |
| H                | x    | 6.4          | 7.366       | 7.1956                   |          |                              |          |
| H                |      | 4.23         | 7.02672223  | 6.89883263               |          |                              |          |
| H                |      | 4.09         | 6.65895849  | 6.83086538               |          |                              |          |
| H                |      | 3.99         | 6.31574757  | 6.30806312               |          |                              |          |
| H                |      | 3.94         | 5.62334185  | 6.28820193               |          |                              |          |
| H                |      | 3.9          | 5.52972158  | 6.22670327               |          |                              |          |
| H                |      | 3.9          | 5.49796781  | 6.1365072                |          |                              |          |
| H                |      | 3.9          | 5.43914671  | 6.08912693               |          |                              |          |
| H                |      | 3.84         | 5.32355889  | 5.88091041               |          |                              |          |
| H                |      | 3.84         | 5.22840201  | 5.83347355               |          |                              |          |
| H                |      | 3.84         | 5.07513711  | 5.73683761               |          |                              |          |
| H                |      | 3.35         | 4.97952293  | 5.72433249               |          |                              |          |
| H                |      | 2.09         | 4.93334971  | 5.71066903               |          |                              |          |
| H                |      | 1.95         | 4.92939646  | 5.37067494               |          |                              |          |
| H                |      | 1.18         | 4.73180577  | 4.51012289               |          |                              |          |
| H                |      | 1.18         | 3.71106121  | 4.28657508               |          |                              |          |
| H                |      | 1.18         | 3.24037063  | 3.99850835               |          |                              |          |
| H                |      | 1.05         | 2.66553159  | 3.93028256               |          |                              |          |
| H                |      | 1.05         | 2.62056587  | 3.91434128               |          |                              |          |
| H                |      | 1.05         | 2.55237927  | 3.49100913               |          |                              |          |
| H                |      | 1.01         | 2.44925192  | 3.490956                 |          |                              |          |
| H                |      | 1.01         | 2.44545436  | 3.44238113               |          |                              |          |
| H                |      | 1.01         | 2.39277685  | 3.43790513               |          |                              |          |

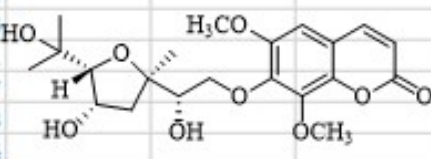

**5A (Isomer 1)**



**5B (Isomer 2)**

Figure S5.13 Results of DP4+ analysis of compound 5

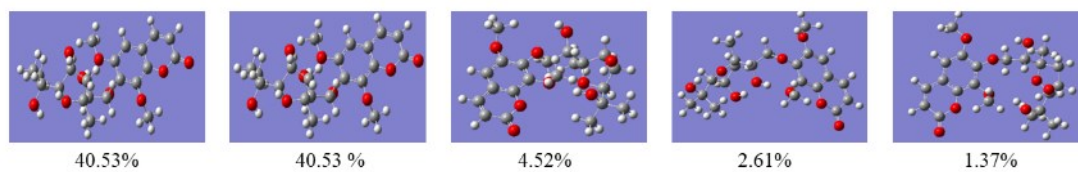

**Figure S5.14** The low-energy conformers of the **5a**

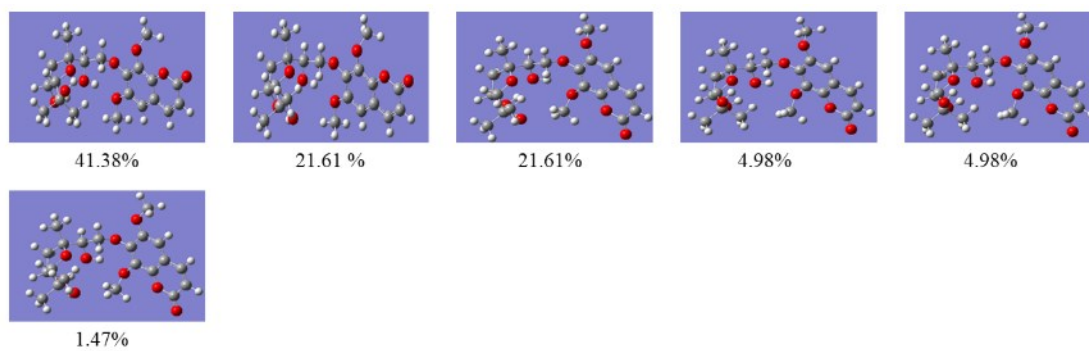

**Figure S5.15** The low-energy conformers of the **5b**

# Spectrum Peak Pick Report

FIELD FIELD TEXT

Data Set: 没有

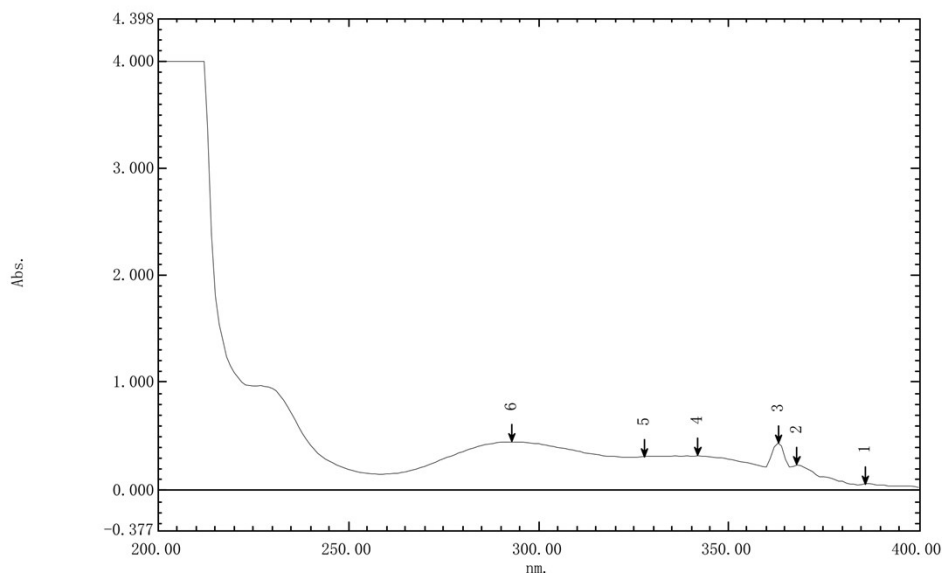

测定属性  
波长范围 (nm.): 200.00到400.00  
扫描速度: 中速  
采样间隔: 1.0  
自动采样间隔: 停用  
扫描模式: 单一的

试样准备属性  
重量:  
体积:  
稀释:  
光程长:  
附加信息:

仪器属性  
仪器类型: UV-1700  
测定方式: 吸收值  
狭缝宽: 1.0 nm  
光源改变波长: 360.0 nm  
S/R 转换: 标准

附件属性  
附件: 无

| No. | P/V | Wavelength | Abs. | 描述 |
|-----|-----|------------|------|----|
| 1   | ⊕   | 386.00     | .056 |    |
| 2   | ⊕   | 368.00     | .231 |    |
| 3   | ⊕   | 363.00     | .433 |    |
| 4   | ⊕   | 342.00     | .315 |    |
| 5   | ⊕   | 328.00     | .313 |    |
| 6   | ⊕   | 293.00     | .445 |    |
| 7   | ⊕   | 384.00     | .043 |    |
| 8   | ⊕   | 366.00     | .210 |    |
| 9   | ⊕   | 360.00     | .212 |    |
| 10  | ⊕   | 330.00     | .309 |    |
| 11  | ⊕   | 322.00     | .301 |    |
| 12  | ⊕   | 259.00     | .145 |    |

FIELD TEXT

Figure S6.1 UV spectrum of compound 6

## Mass Spectrum Molecular Formula Report

|                      |                                                 |                   |                      |
|----------------------|-------------------------------------------------|-------------------|----------------------|
| <b>Analysis Info</b> |                                                 | Acquisition Date  | 4/10/2019 1:24:26 PM |
| Analysis Name        | D:\Data\20190410CEYANG\AAS-52A_1-D_5_01_13480.d | Instrument / Ser# | Bruker Customer      |
| Method               | 20190328yezhi.m                                 | Operator          | micrOTOF-Q 125       |
| Sample Name          | AAS-52A                                         |                   |                      |
| Comment              |                                                 |                   |                      |

|                              |          |                       |           |
|------------------------------|----------|-----------------------|-----------|
| <b>Acquisition Parameter</b> |          |                       |           |
| Source Type                  | ESI      | Ion Polarity          | Positive  |
| Focus                        | Active   | Set Capillary         | 4500 V    |
| Scan Begin                   | 50 m/z   | Set End Plate Offset  | -500 V    |
| Scan End                     | 1500 m/z | Set Collision Cell RF | 400.0 Vpp |
|                              |          | Set Nebulizer         | 1.2 Bar   |
|                              |          | Set Dry Heater        | 180 °C    |
|                              |          | Set Dry Gas           | 8.0 l/min |
|                              |          | Set Divert Valve      | Source    |

|                                             |                        |         |
|---------------------------------------------|------------------------|---------|
| <b>Generate Molecular Formula Parameter</b> |                        |         |
| Formula, min.                               |                        |         |
| Formula, max.                               |                        |         |
| Measured m/z                                | Tolerance              | Charge  |
| Check Valence                               | Minimum                | Maximum |
| Nitrogen Rule                               | Electron Configuration |         |
| Filter H/C Ratio                            | Minimum                | Maximum |
| Estimate Carbon                             |                        |         |

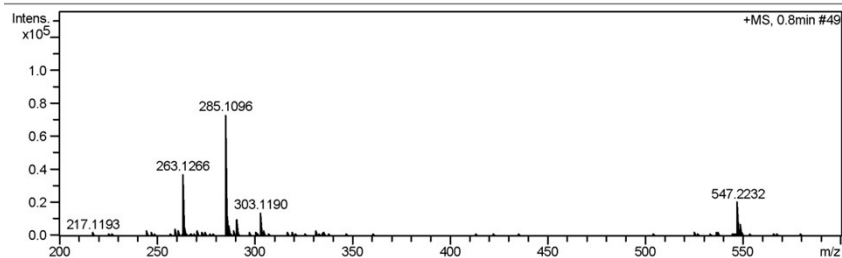

**Figure S6.2** HRESIMS spectrum of compound **6**

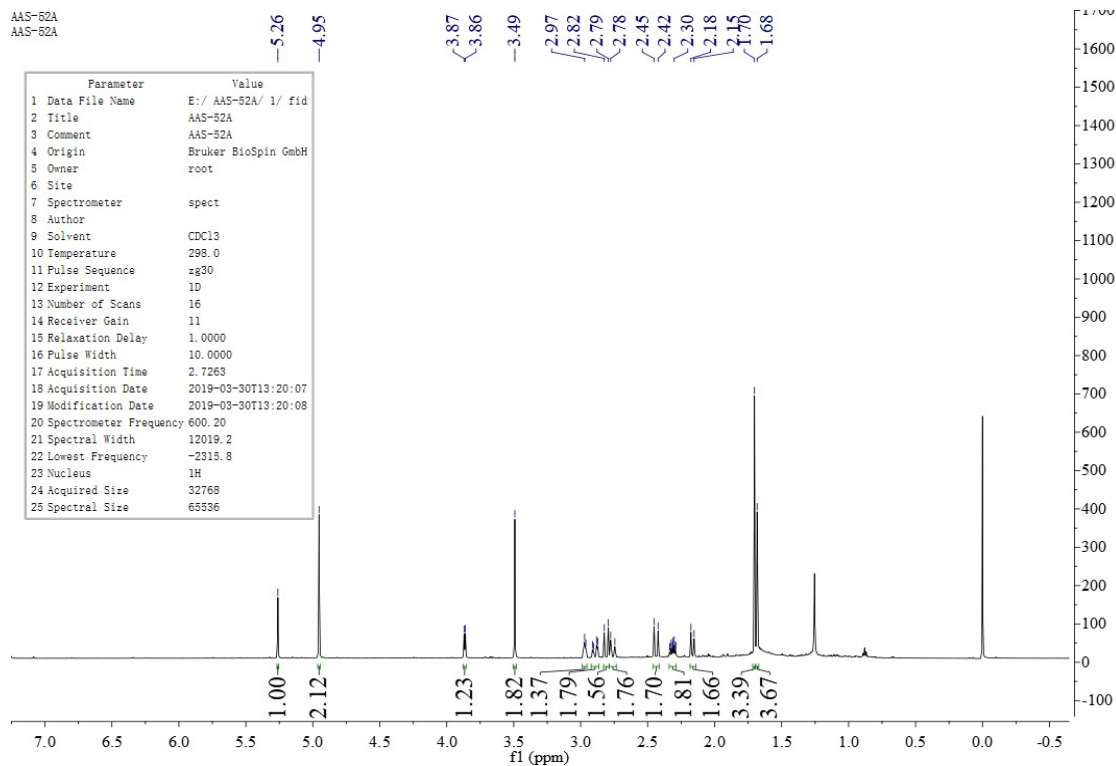

**Figure S6.3**  $^1\text{H}$  NMR spectrum (600 MHz,  $\text{DMSO-}d_6$ ) of compound **6**

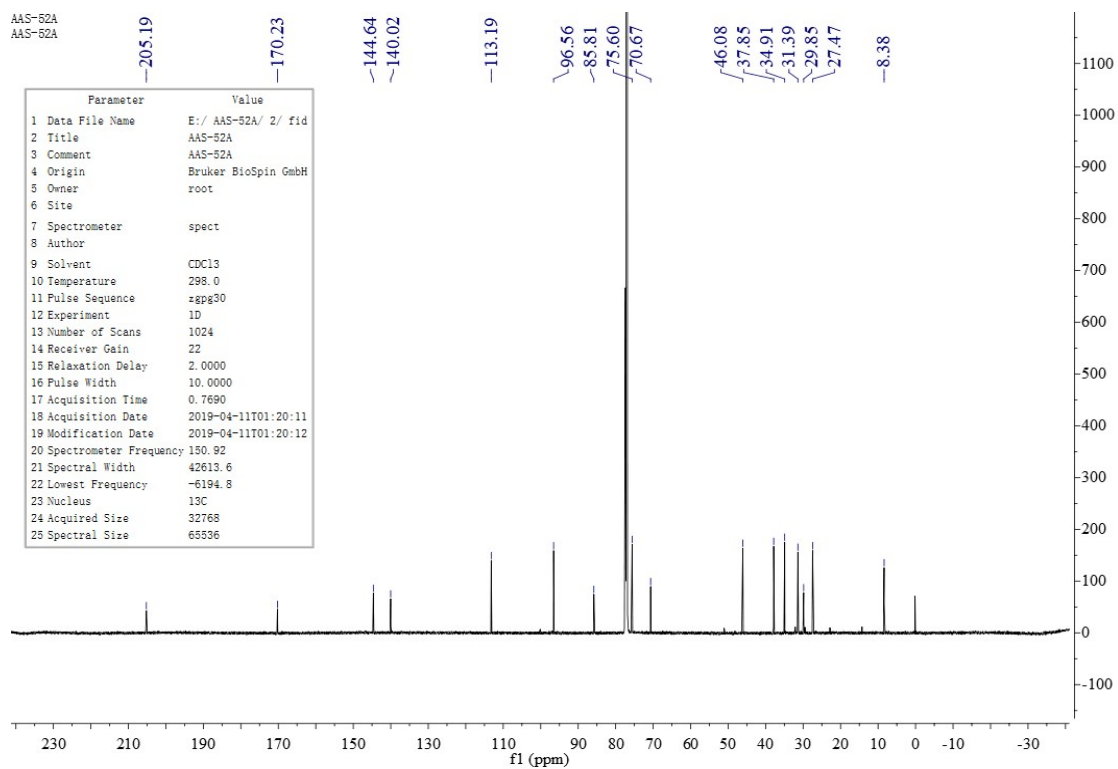

**Figure S6.4**  $^{13}\text{C}$  NMR spectrum (150 MHz,  $\text{DMSO-}d_6$ ) of compound **6**

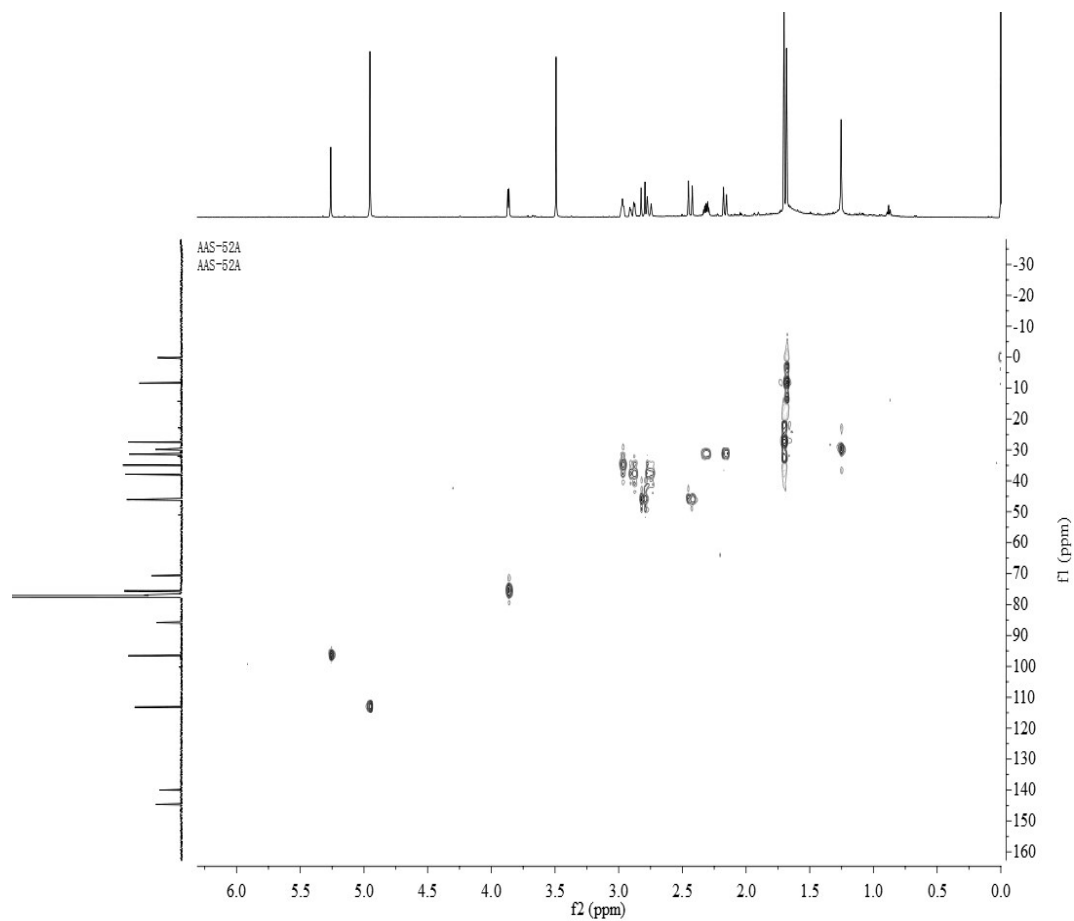

**Figure S6.5** HSQC spectrum (600 MHz,  $\text{DMSO-}d_6$ ) of compound **6**

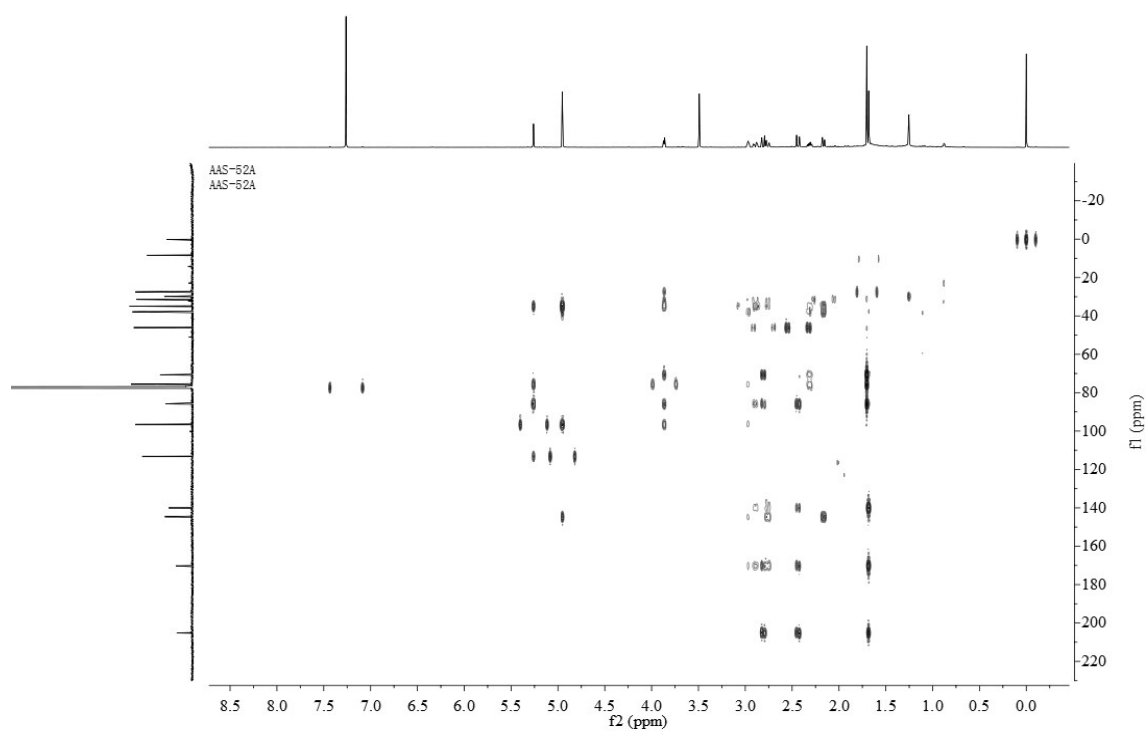

**Figure S6.6** HMBC spectrum (600 MHz, DMSO-*d*<sub>6</sub>) of compound **6**

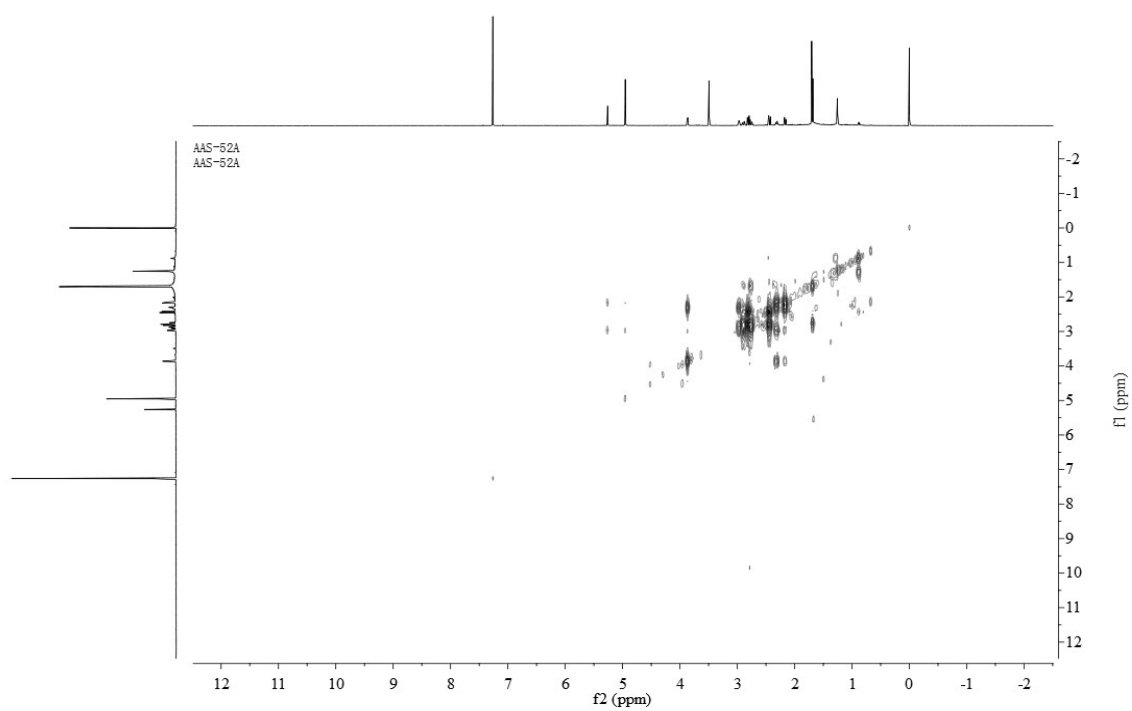

**Figure S6.7** <sup>1</sup>H-<sup>1</sup>H COSY spectrum of compound **6**



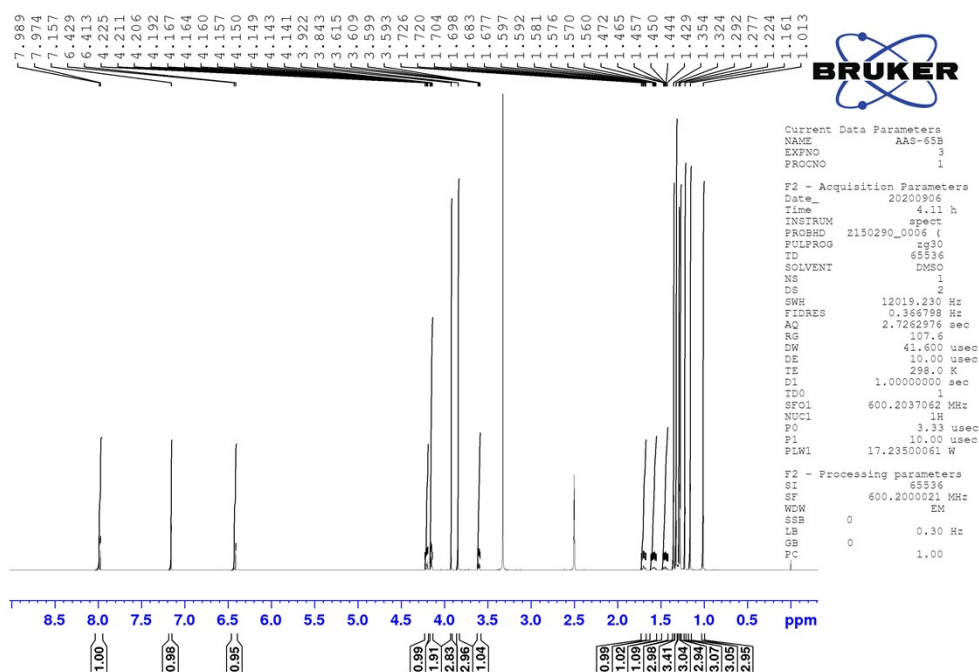

Figure S6.8  $^1\text{H}$  NMR spectrum (600 MHz,  $\text{DMSO-}d_6$ ) of compound 6a

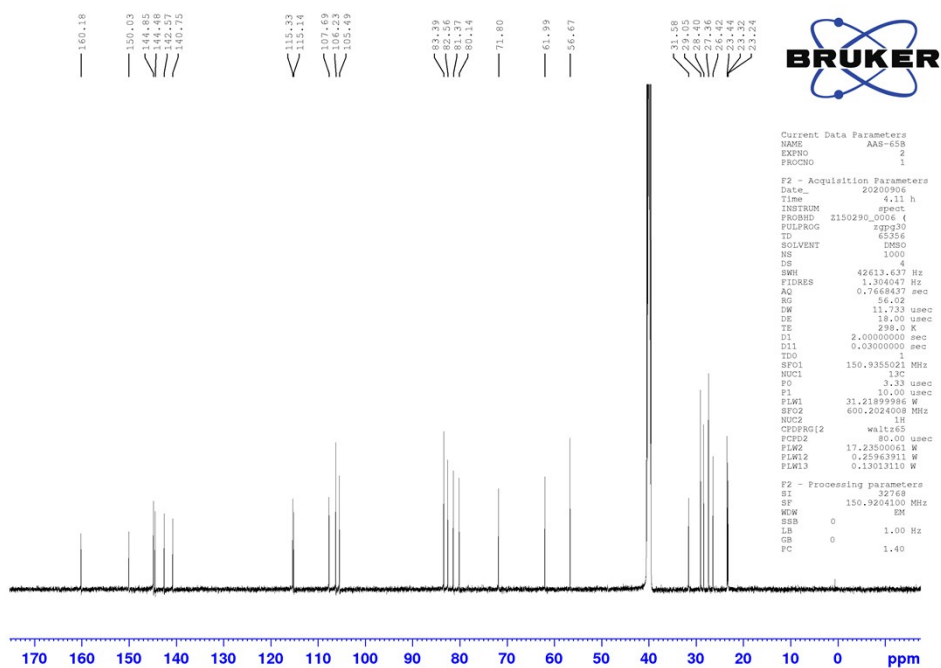

Figure S6.9  $^{13}\text{C}$  NMR spectrum (150 MHz,  $\text{DMSO-}d_6$ ) of compound 6a

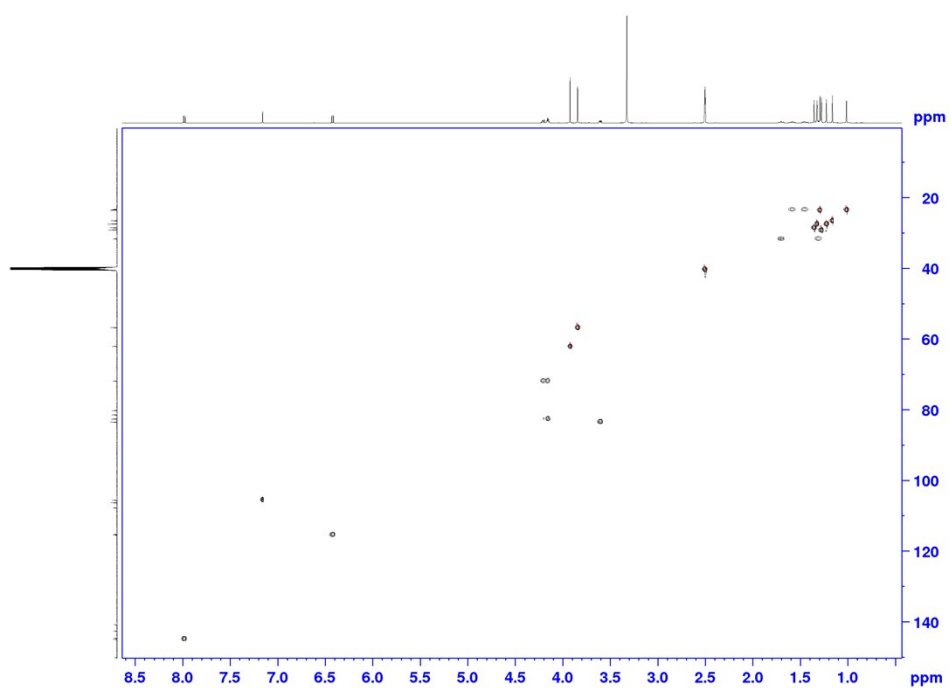

**Figure S6.10** HSQC spectrum (600 MHz, DMSO-*d*<sub>6</sub>) of compound **6a**

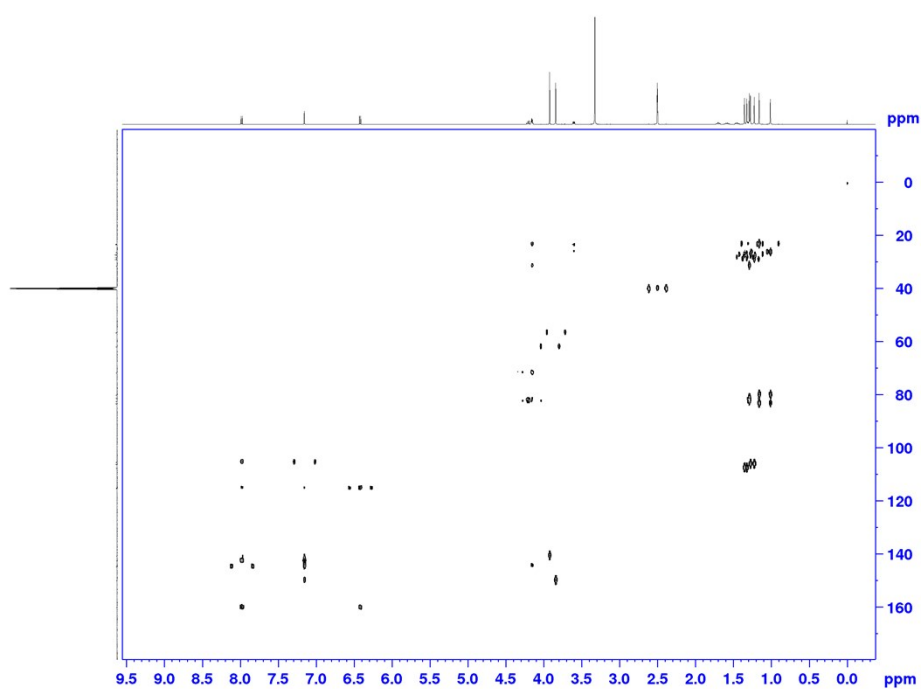

**Figure S6.11** HMBC spectrum (600 MHz, DMSO-*d*<sub>6</sub>) of compound **6a**

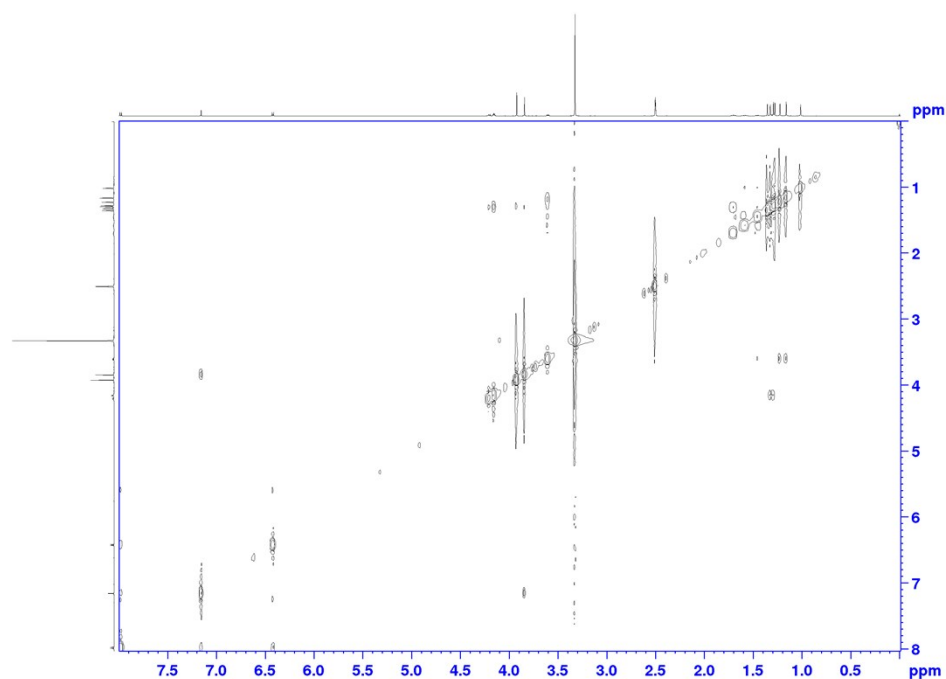

**Figure S6.12** NOESY spectrum of compound **6a**

**Table S1**  $^1\text{H}$  NMR spectroscopic data for compounds **1**, **5**, **7**, **8**.

| NO.                | <b>1</b> <sup>a</sup>                        | <b>5</b> <sup>b</sup>                        | <b>7</b> <sup>a</sup> | <b>8</b> <sup>a</sup> |
|--------------------|----------------------------------------------|----------------------------------------------|-----------------------|-----------------------|
| 3                  | 6.36 (d, 9.5)                                | 6.40 (d, 9.5)                                | 6.33 (d, 9.5)         | 6.34 (d, 9.5)         |
| 4                  | 7.63 (d, 9.5)                                | 7.97 (d, 9.5)                                | 7.60 (d, 9.5)         | 7.61 (d, 9.5)         |
| 5                  | 6.70 (s)                                     | 7.12 (s)                                     | 6.55 (s)              | 6.65 (s)              |
| 1'                 | 4.56 (dd, 10.6, 2.5)<br>4.06 (dd, 10.6, 7.9) | 4.09 (dd, 10.6, 2.7)<br>3.99 (dd, 10.6, 7.0) | 4.67 (d, 6.9)         | 4.67 (d, 6.9)         |
| 2'                 | 3.71 (dd, 7.9, 2.5)                          | 3.94 (dd, 7.0, 2.7)                          | 5.55 (dq, 6.9, 1.5)   | 5.55 (1H, m)          |
| 4'                 | 1.61 (m), 1.41 (m)                           | 2.09 (dd, 12.5, 6.7)<br>1.95 (dd, 12.5, 8.0) | 2.03 (m)              | 1.77 (d, 1.5)         |
| 5'                 | 2.15 (m), 2.06 (m)                           | 4.23 (m)                                     | 2.05 (m)              | 1.71 (d, 1.5)         |
| 6'                 | 5.11 (t, 7.0)                                | 3.35 (m)                                     | 5.06 (m)              | -                     |
| 7'                 | -                                            | -                                            | -                     | -                     |
| 8'                 | 1.67 (s)                                     | 1.05 (s)                                     | 1.66 (d, 1.5)         | -                     |
| 9'                 | 1.25 (s)                                     | 1.18 (s)                                     | 1.69 (d, 1.5)         | -                     |
| 10'                | 1.61 (s)                                     | 1.01 (s)                                     | 1.58 (d, 1.5)         | -                     |
| 6-OCH <sub>3</sub> | 3.87 (s)                                     | 3.84 (s)                                     | 3.88 (s)              | 3.89 (s)              |
| 8-OCH <sub>3</sub> | 4.01 (s)                                     | 3.90 (s)                                     | 4.03 (s)              | 4.03 (s)              |
| 2'-OH              | -                                            | 5.15 (s)                                     | -                     | -                     |
| 6'-OH              | -                                            | 5.04 (d, 5.2)                                | -                     | -                     |
| 7'-OH              | -                                            | 4.19 (s)                                     | -                     | -                     |

<sup>a</sup> Recorded in CDCl<sub>3</sub> and 600 MHz. o: The abbreviation for overlapped.

<sup>b</sup> Recorded in DMSO-*d*<sub>6</sub> and 600 MHz.

**Table S2** <sup>13</sup>C NMR spectroscopic data for compounds **1**, **5**, **7**, **8**.

| NO.                | <b>1</b> <sup>a</sup> | <b>5</b> <sup>b</sup> | <b>7</b> <sup>a</sup> | <b>8</b> <sup>a</sup> |
|--------------------|-----------------------|-----------------------|-----------------------|-----------------------|
| 2                  | 160.2                 | 159.8                 | 160.7                 | 160.7                 |
| 3                  | 115.4                 | 114.6                 | 115.3                 | 115.2                 |
| 4                  | 143.5                 | 144.4                 | 143.6                 | 143.6                 |
| 5                  | 103.9                 | 105.0                 | 103.6                 | 103.7                 |
| 6                  | 149.7                 | 149.7                 | 150.8                 | 150.8                 |
| 7                  | 144.7                 | 144.4                 | 145.0                 | 145.0                 |
| 8                  | 141.0                 | 140.3                 | 141.9                 | 141.1                 |
| 9                  | 142.9                 | 142.2                 | 142.7                 | 143.1                 |
| 10                 | 114.8                 | 114.4                 | 114.6                 | 114.3                 |
| 1'                 | 76.1                  | 73.6                  | 70.4                  | 70.4                  |
| 2'                 | 75.1                  | 84.4                  | 119.7                 | 120.1                 |
| 3'                 | 73.4                  | 78.6                  | 143.1                 | 139.4                 |
| 4'                 | 38.0                  | 42.1                  | 39.7                  | 26.0                  |
| 5'                 | 22.1                  | 77.6                  | 26.5                  | 18.1                  |
| 6'                 | 124.3                 | 76.9                  | 23.9                  |                       |
| 7'                 | 131.8                 | 71.1                  | 131.9                 |                       |
| 8'                 | 25.7                  | 25.3                  | 25.8                  |                       |
| 9'                 | 23.3                  | 21.7                  | 16.4                  |                       |
| 10'                | 17.7                  | 27.2                  | 17.6                  |                       |
| 6-OCH <sub>3</sub> | 56.4                  | 56.2                  | 56.4                  | 56.4                  |
| 8-OCH <sub>3</sub> | 62.0                  | 61.4                  | 61.8                  | 61.8                  |

<sup>a</sup> Recorded in CDCl<sub>3</sub> and 150 MHz.

<sup>b</sup> Recorded in DMSO-*d*<sub>6</sub> and 150 MHz.

**Table S3** <sup>1</sup>H NMR (600MHz) and <sup>13</sup>C NMR (150MHz) spectroscopic data for compounds **1a**, **2a** (in CDCl<sub>3</sub>).

| NO. | <b>2a</b>           |                     | <b>1a</b>           |                     |
|-----|---------------------|---------------------|---------------------|---------------------|
|     | $\delta_{\text{H}}$ | $\delta_{\text{C}}$ | $\delta_{\text{H}}$ | $\delta_{\text{C}}$ |
| 2   | -                   | 174.1               | -                   | 160.6               |
| 3   | 2.64 (t, 7.6)       | 34.3                | 6.35 (d, 9.5)       | 115.6               |
| 4   | 2.90 (t, 7.6)       | 25.8                | 7.60 (d, 9.5)       | 143.5               |
| 5   | 6.44 (s)            | 108.8               | 6.60 (s)            | 103.8               |
| 6   | -                   | 146.4               | -                   | 150.3               |
| 7   | -                   | 139.6               | -                   | 145.0               |
| 8   | -                   | 140.5               | -                   | 141.5               |
| 9   | -                   | 141.3               | -                   | 143.1               |
| 10  | -                   | 121.0               | -                   | 114.8               |

|                    |                                              |       |                                              |       |
|--------------------|----------------------------------------------|-------|----------------------------------------------|-------|
| 1'                 | 4.16 (m)<br>4.03 (dd, 9.2, 36)               | 71.7  | 4.33 (dd, 10.1, 7.0)<br>4.11 (dd, 10.1, 4.9) | 72.2  |
| 2'                 | 4.19 (m)                                     | 83.0  | 4.21 (dd, 7.0, 4.9)                          | 82.7  |
| 3'                 | -                                            | 81.6  | -                                            | 81.7  |
| 4'                 | 1.59 (dd, 12.7, 7.5)<br>1.29 (dd, 12.7, 6.0) | 35.1  | 1.58 (m), 1.31 (m)                           | 35.1  |
| 5'                 | 2.17 (m), 2.03 (m)                           | 22.0  | 2.20 (m), 2.03 (m)                           | 22.0  |
| 6'                 | 5.10 (t, 7.4)                                | 125.6 | 5.11 (t, 7.2)                                | 124.5 |
| 7'                 | -                                            | 131.7 | -                                            | 131.8 |
| 8'                 | 1.67 (s)                                     | 25.8  | 1.67 (s)                                     | 25.8  |
| 9'                 | 1.34 (s)                                     | 23.4  | 1.34 (s)                                     | 23.5  |
| 10'                | 1.60 (s)                                     | 17.7  | 1.61 (s)                                     | 17.7  |
| 1''                | -                                            | 107.9 | -                                            | 108.1 |
| 2''                | 1.41 (s)                                     | 27.2  | 1.42 (s)                                     | 27.2  |
| 3''                | 1.45 (s)                                     | 28.5  | 1.45 (s)                                     | 28.5  |
| 2-OCH <sub>3</sub> | 3.68 (s)                                     | 51.8  | -                                            | -     |
| 6-OCH <sub>3</sub> | 3.77 (s)                                     | 56.6  | 3.87 (s)                                     | 56.4  |
| 8-OCH <sub>3</sub> | 3.95 (s)                                     | 61.8  | 4.03 (s)                                     | 62.1  |

**Table S4** <sup>1</sup>H NMR (600MHz) and <sup>13</sup>C NMR (150MHz) spectroscopic data for compounds **6a** (in DMSO-*d*<sub>6</sub>).

| NO. | <b>6a</b>                        |                     |
|-----|----------------------------------|---------------------|
|     | $\delta_{\text{H}}$              | $\delta_{\text{C}}$ |
| 2   | -                                | 159.7               |
| 3   | 6.42 (d, 9.5)                    | 114.6               |
| 4   | 7.98 (d, 9.5)                    | 144.0               |
| 5   | 7.16 (s)                         | 105.0               |
| 6   | -                                | 149.7               |
| 7   | -                                | 144.4               |
| 8   | -                                | 140.3               |
| 9   | -                                | 142.1               |
| 10  | -                                | 114.9               |
| 1'  | 4.21 (dd, 10.5, 8.2)<br>4.15 (o) | 71.3                |
| 2'  | 3.60 (8.2, 3.8)                  | 82.9                |
| 3'  | -                                | 79.7                |
| 4'  | 1.70 (dt, 12.9, 3.8)<br>1.31 (o) | 31.1                |
| 5'  | 1.58 (m), 1.45 (m)               | 22.8                |
| 6'  | 4.15 (o)                         | 82.1                |
| 7'  | -                                | 80.9                |
| 8'  | 1.01 (s)                         | 22.9                |
| 9'  | 1.16 (s)                         | 26.0                |

|                    |          |       |
|--------------------|----------|-------|
| 10'                | 1.29 (s) | 23.0  |
| 1"                 | -        | 105.8 |
| 2"                 | 1.23 (s) | 26.9  |
| 3"                 | 1.27 (s) | 27.9  |
| 1"                 | -        | 107.2 |
| 2"                 | 1.32 (s) | 26.9  |
| 3"                 | 1.35 (s) | 28.6  |
| 6-OCH <sub>3</sub> | 3.92 (s) | 61.5  |
| 8-OCH <sub>3</sub> | 3.84 (s) | 56.2  |

**Table S5** Cytotoxicity of compounds **1-8** against two human cancer cell lines.

| Compounds              | IC <sub>50</sub> (μM) ± SD <sup>a</sup> |              |
|------------------------|-----------------------------------------|--------------|
|                        | hep 3B                                  | hepG2        |
| <b>1</b>               | 27.86 ± 1.11                            | 38.55 ± 1.37 |
| <b>2</b>               | >50                                     | >50          |
| <b>3</b>               | >50                                     | >50          |
| <b>4</b>               | >50                                     | >50          |
| <b>5</b>               | >50                                     | >50          |
| <b>6</b>               | >50                                     | >50          |
| <b>7</b>               | >50                                     | >50          |
| <b>8</b>               | >50                                     | >50          |
| sorafenib <sup>b</sup> | 6.436 ± 0.70                            | 9.014 ± 0.62 |

a Cytotoxicity was expressed as the mean value of three experiments ± SD

b Sorafenib was used as positive control

**Table S6** DFT B3LYP/6-311+G(d, p) relative free energies and population for the most relevant conformers of **3a**

| Conformer   | $\Delta G^a$ | Population <sup>b</sup> |
|-------------|--------------|-------------------------|
| <b>3a-1</b> | 0.0000       | 0.1545                  |
| <b>3a-2</b> | 0.0001       | 0.1545                  |
| <b>3a-3</b> | 0.0001       | 0.1320                  |
| <b>3a-4</b> | 0.0002       | 0.1320                  |
| <b>3a-5</b> | 0.0007       | 0.0747                  |

|              |        |        |
|--------------|--------|--------|
| <b>3a-6</b>  | 0.0008 | 0.0630 |
| <b>3a-7</b>  | 0.0009 | 0.0320 |
| <b>3a-8</b>  | 0.0012 | 0.0281 |
| <b>3a-9</b>  | 0.0015 | 0.0247 |
| <b>3a-10</b> | 0.0018 | 0.0219 |

**Table S7** DFT B3LYP/6-311+G(d, p) relative free energies and population for the most relevant conformers of **3b**

| Conformer    | $\Delta G^a$ | Population <sup>b</sup> |
|--------------|--------------|-------------------------|
| <b>3b-1</b>  | 0.0000       | 0.1241                  |
| <b>3b-2</b>  | 0.0001       | 0.1134                  |
| <b>3b-3</b>  | 0.0002       | 0.1037                  |
| <b>3b-4</b>  | 0.0003       | 0.0909                  |
| <b>3b-5</b>  | 0.0003       | 0.0909                  |
| <b>3b-6</b>  | 0.0005       | 0.0759                  |
| <b>3b-7</b>  | 0.0006       | 0.0650                  |
| <b>3b-8</b>  | 0.0008       | 0.0547                  |
| <b>3b-9</b>  | 0.0008       | 0.0509                  |
| <b>3b-10</b> | 0.0013       | 0.0288                  |

**Table S8** DFT B3LYP/6-311+G(d, p) relative free energies and population for the most relevant conformers of **4a**

| Conformer   | $\Delta G^a$ | Population <sup>b</sup> |
|-------------|--------------|-------------------------|
| <b>4a-1</b> | 0.0000       | 0.1147                  |
| <b>4a-2</b> | 0.0000       | 0.1103                  |
| <b>4a-3</b> | 0.0000       | 0.1102                  |
| <b>4a-4</b> | 0.0000       | 0.1102                  |
| <b>4a-5</b> | 0.0002       | 0.0910                  |
| <b>4a-6</b> | 0.0003       | 0.0853                  |
| <b>4a-7</b> | 0.0009       | 0.0451                  |

|              |        |        |
|--------------|--------|--------|
| <b>4a-8</b>  | 0.0009 | 0.0445 |
| <b>4a-9</b>  | 0.0009 | 0.0431 |
| <b>4a-10</b> | 0.0010 | 0.0414 |

**Table S9** DFT B3LYP/6-311+G(d, p) relative free energies and population for the most relevant conformers of **4b**

| Conformer    | $\Delta G^a$ | Population <sup>b</sup> |
|--------------|--------------|-------------------------|
| <b>4b-1</b>  | 0.0000       | 0.0885                  |
| <b>4b-2</b>  | 0.0001       | 0.0829                  |
| <b>4b-3</b>  | 0.0002       | 0.0729                  |
| <b>4b-4</b>  | 0.0002       | 0.0689                  |
| <b>4b-5</b>  | 0.0002       | 0.0688                  |
| <b>4b-6</b>  | 0.0002       | 0.0688                  |
| <b>4b-7</b>  | 0.0003       | 0.0648                  |
| <b>4b-8</b>  | 0.0003       | 0.0639                  |
| <b>4b-9</b>  | 0.0008       | 0.0371                  |
| <b>4b-10</b> | 0.0009       | 0.0338                  |

**Table S10** DFT B3LYP/6-311+G(d, p) relative free energies and population for the most relevant conformers of **5a**

| Conformer   | $\Delta G^a$ | Population <sup>b</sup> |
|-------------|--------------|-------------------------|
| <b>5a-1</b> | 0.0000       | 0.4053                  |
| <b>5a-2</b> | 0.0000       | 0.4053                  |
| <b>5a-3</b> | 0.0020       | 0.0452                  |
| <b>5a-4</b> | 0.0026       | 0.0261                  |
| <b>5a-5</b> | 0.0032       | 0.0137                  |

**Table S11** DFT B3LYP/6-311+G(d, p) relative free energies and population for the most relevant conformers of **5b**

| Conformer | $\Delta G^a$ | Population <sup>b</sup> |
|-----------|--------------|-------------------------|
|-----------|--------------|-------------------------|



|             |        |        |
|-------------|--------|--------|
| <b>5b-1</b> | 0.0000 | 0.4138 |
| <b>5b-2</b> | 0.0006 | 0.2161 |
| <b>5b-3</b> | 0.0006 | 0.2161 |
| <b>5b-4</b> | 0.0020 | 0.0498 |
| <b>5b-5</b> | 0.0020 | 0.0498 |
| <b>5b-6</b> | 0.0032 | 0.0147 |

**Table S12** Calculated  $^{13}\text{C}$  chemical shift values (cal.) of structure **3a-5a**, **3b-5b**

| NO.                  | <b>3a</b> | <b>3b</b> | <b>4a</b> | <b>4b</b> | <b>5a</b> | <b>5b</b> |
|----------------------|-----------|-----------|-----------|-----------|-----------|-----------|
| 1                    | -         | -         | 117.5     | 117.3     | -         | -         |
| 2                    | 147.9     | 175.0     | 117.5     | 118.1     | 168.2     | 168.3     |
| 3                    | 128.0     | 127.9     | 169.7     | 169.9     | 120.5     | 123.0     |
| 4                    | 161.9     | 162.4     | 154.6     | 154.7     | 154.8     | 154.0     |
| 5                    | 117.1     | 117.3     | 153.1     | 152.5     | 111.2     | 109.2     |
| 6                    | 166.9     | 166.8     | 170.4     | 170.3     | 158.0     | 158.0     |
| 7                    | 165.1     | 166.5     | -         | -         | 156.6     | 156.1     |
| 8                    | 157.2     | 157.1     | -         | -         | 150.2     | 150.2     |
| 9                    | 160.7     | 160.8     | -         | -         | 153.5     | 153.4     |
| 10                   | 130.0     | 130.2     | -         | -         | 119.9     | 120.3     |
| 1'                   | 94.1      | 93.8      | 93.0      | 89.7      | 80.1      | 81.8      |
| 2'                   | 90.3      | 90.6      | 90.2      | 90.3      | 94.4      | 91.4      |
| 3'                   | 99.1      | 99.0      | 98.7      | 96.7      | 84.6      | 83.8      |
| 4'                   | 50.1      | 45.8      | 50.7      | 50.5      | 47.4      | 48.7      |
| 5'                   | 39.6      | 40.0      | 39.7      | 40.6      | 81.9      | 82.7      |
| 6'                   | 82.2      | 82.2      | 82.0      | 82.0      | 90.8      | 90.9      |
| 7'                   | 31.5      | 36.4      | 31.4      | 36.4      | 78.8      | 78.8      |
| 8'                   | -         | -         | -         | -         | 27.3      | 30.3      |
| 9'                   | -         | -         | -         | -         | 26.1      | 26.9      |
| 10'                  | -         | -         | -         | -         | 26.4      | 28.3      |
| 1''                  | -         | -         | 44.6      | 44.5      | -         | -         |
| 2''                  | -         | -         | 50.3      | 46.3      | -         | -         |
| 3''                  | -         | -         | 192.8     | 192.8     | -         | -         |
| 6-OCH <sub>3</sub>   | 65.7      | 65.7      | 65.4      | 65.3      | 58.1      | 58.1      |
| 8-OCH <sub>3</sub>   | 71.7      | 71.6      | 65.5      | 65.4      | 63.5      | 63.8      |
| 3''-OCH <sub>3</sub> | -         | -         | 63.0      | 63.0      | -         | -         |
